# Supplementary material for: Enantioselective synthesis of fluorene derivatives by chiral N-triflyl phosphoramide catalyzed double Friedel–Crafts alkylation reaction
Source: Royal Society of Chemistry journal article supplement (doi:10.1039/c2ob07168a), 2012-01-01
Supplement: c2ob07168a.pdf [file c2ob07168a.pdf]

*Supporting Information for*

**Enantioselective Synthesis of Fluorene Derivatives Catalyzed by  
Chiral *N*-Triflyl Phosphoramidate via Double Friedel-Crafts Reaction**

*Shou-Guo Wang, Long Han, Mi Zeng, Feng-Lai Sun, Wei Zhang and Shu-Li You\**

State Key Laboratory of Organometallic Chemistry  
Shanghai Institute of Organic Chemistry, Chinese Academy of Sciences  
345 Lingling Lu, Shanghai 200032, China  
Fax: (+86) 21-54925087  
E-mail: [slyou@sioc.ac.cn](mailto:slyou@sioc.ac.cn)

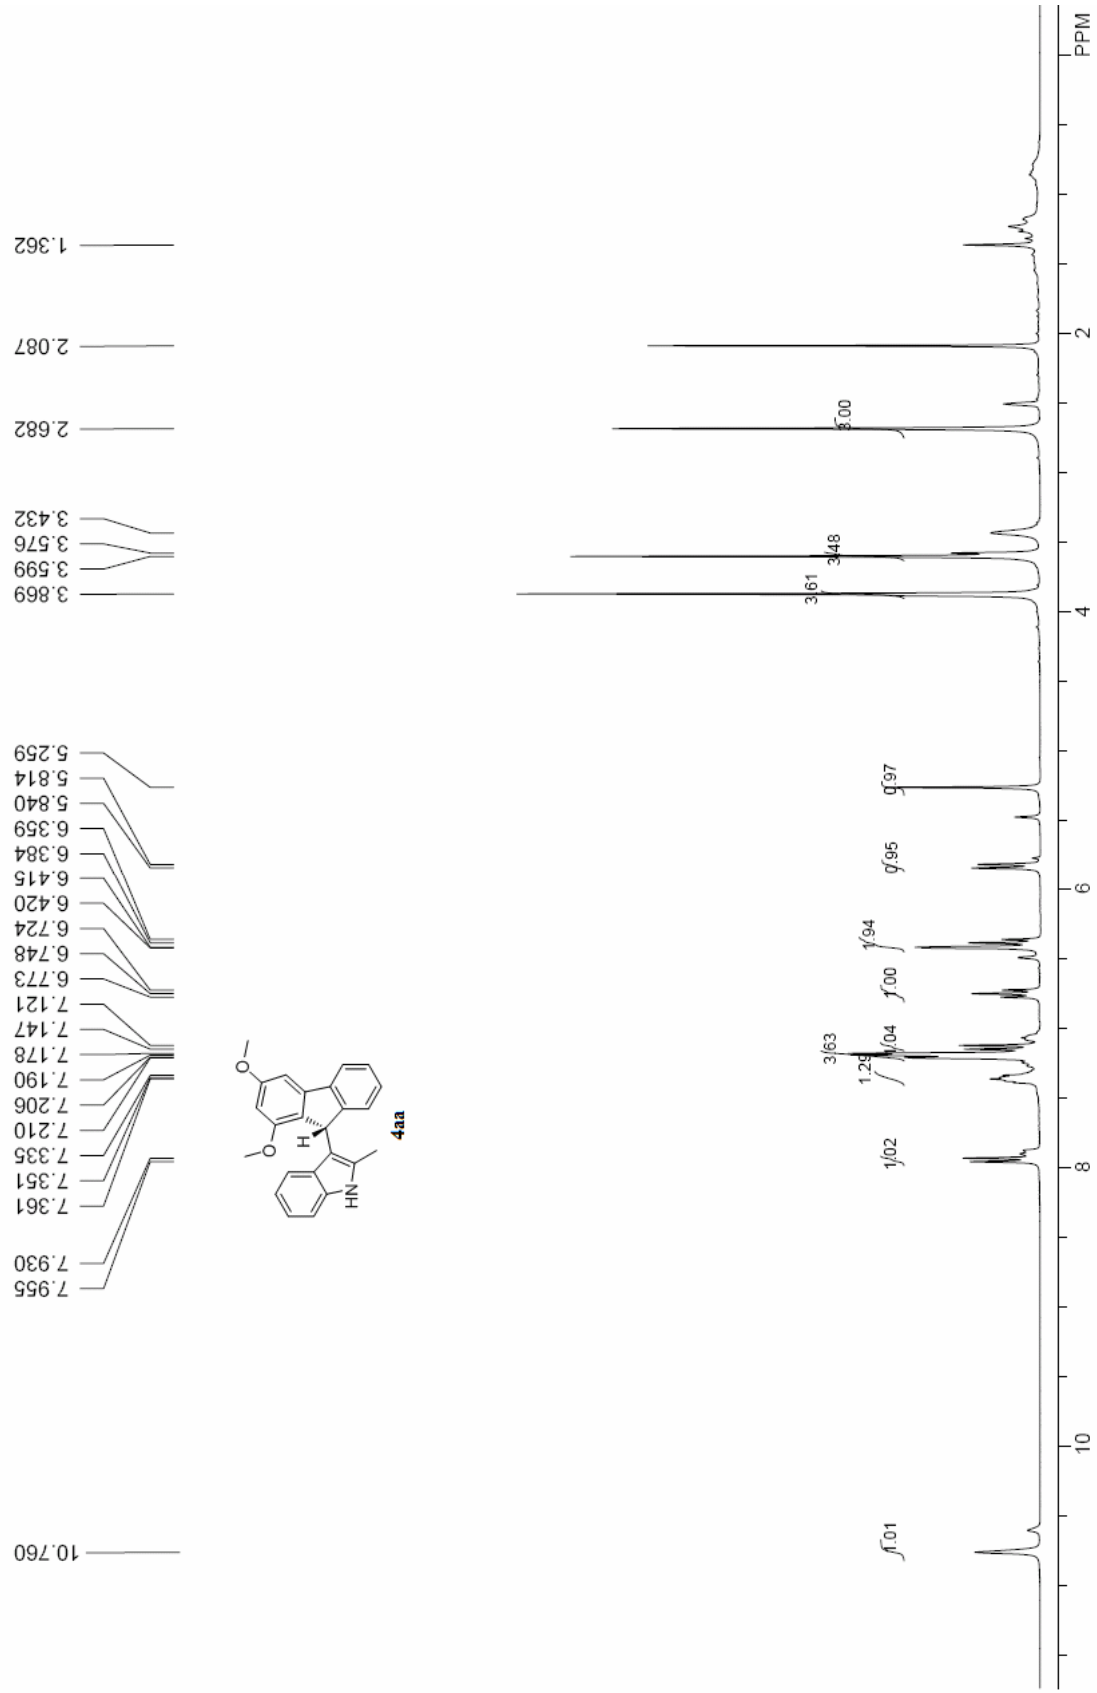

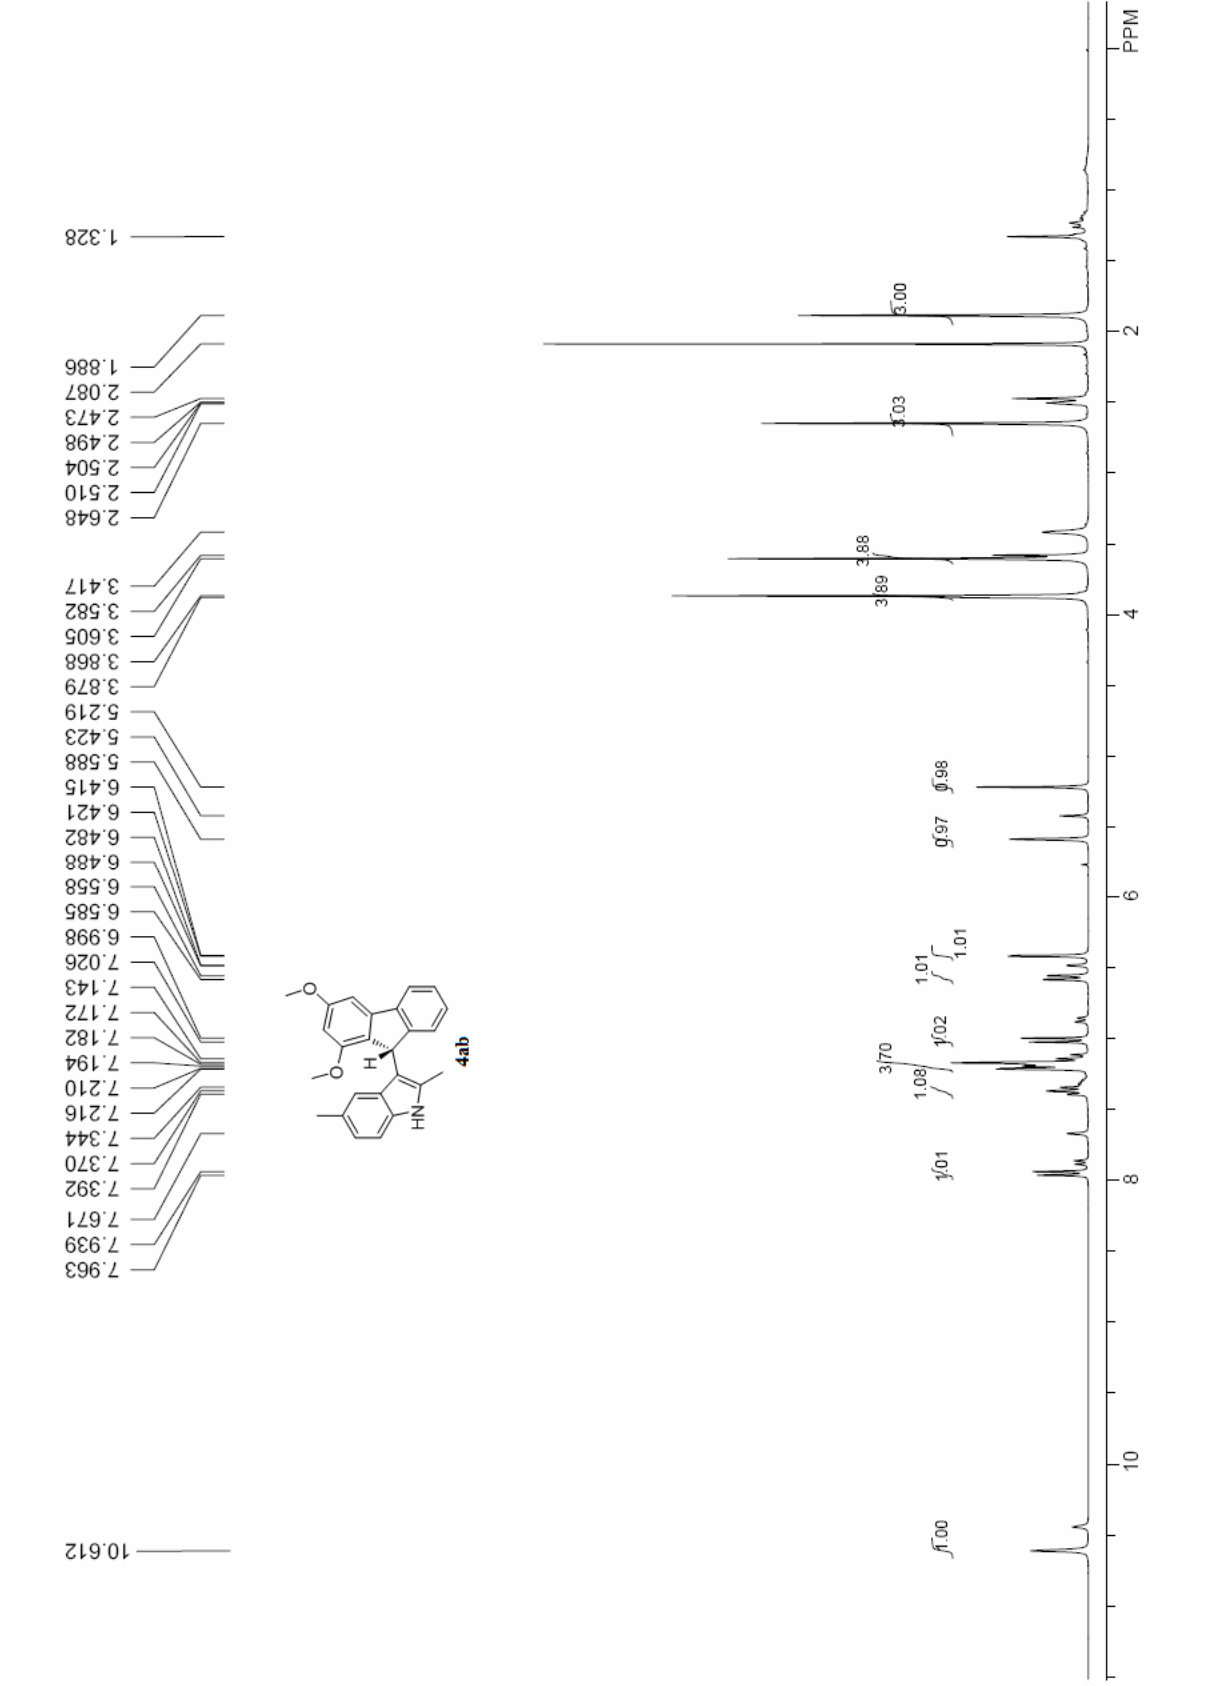

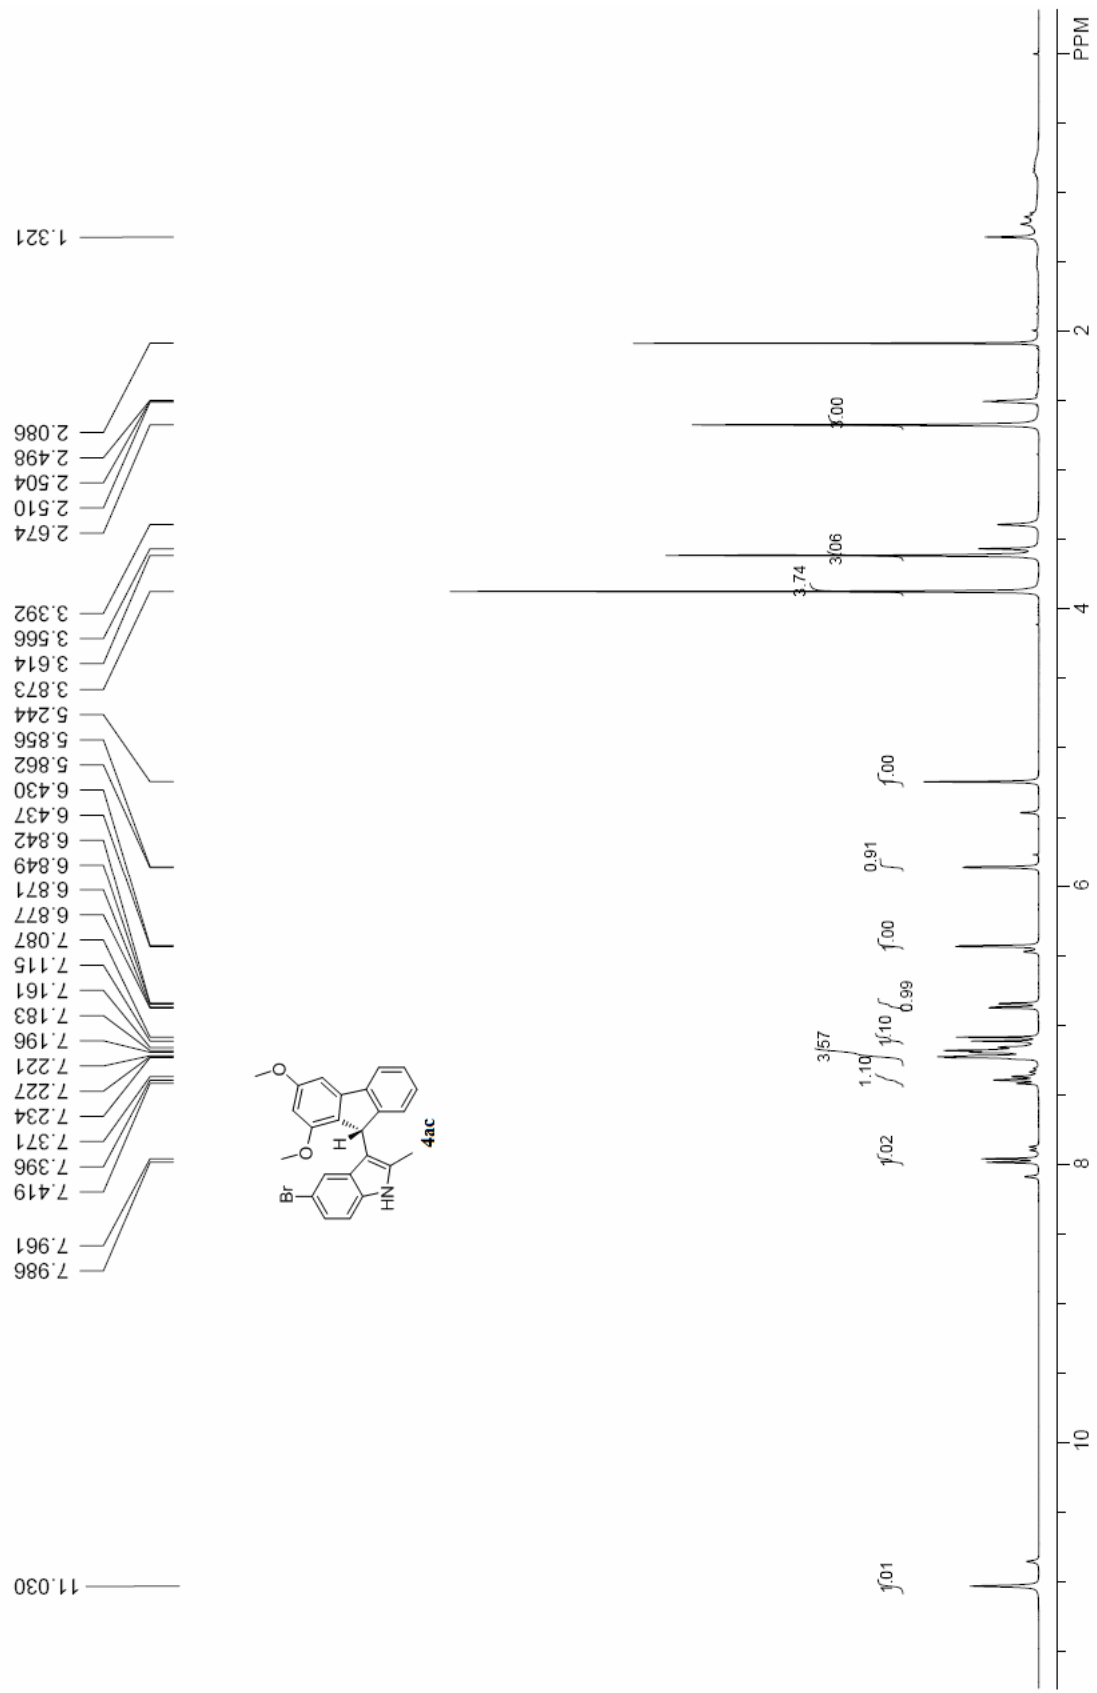

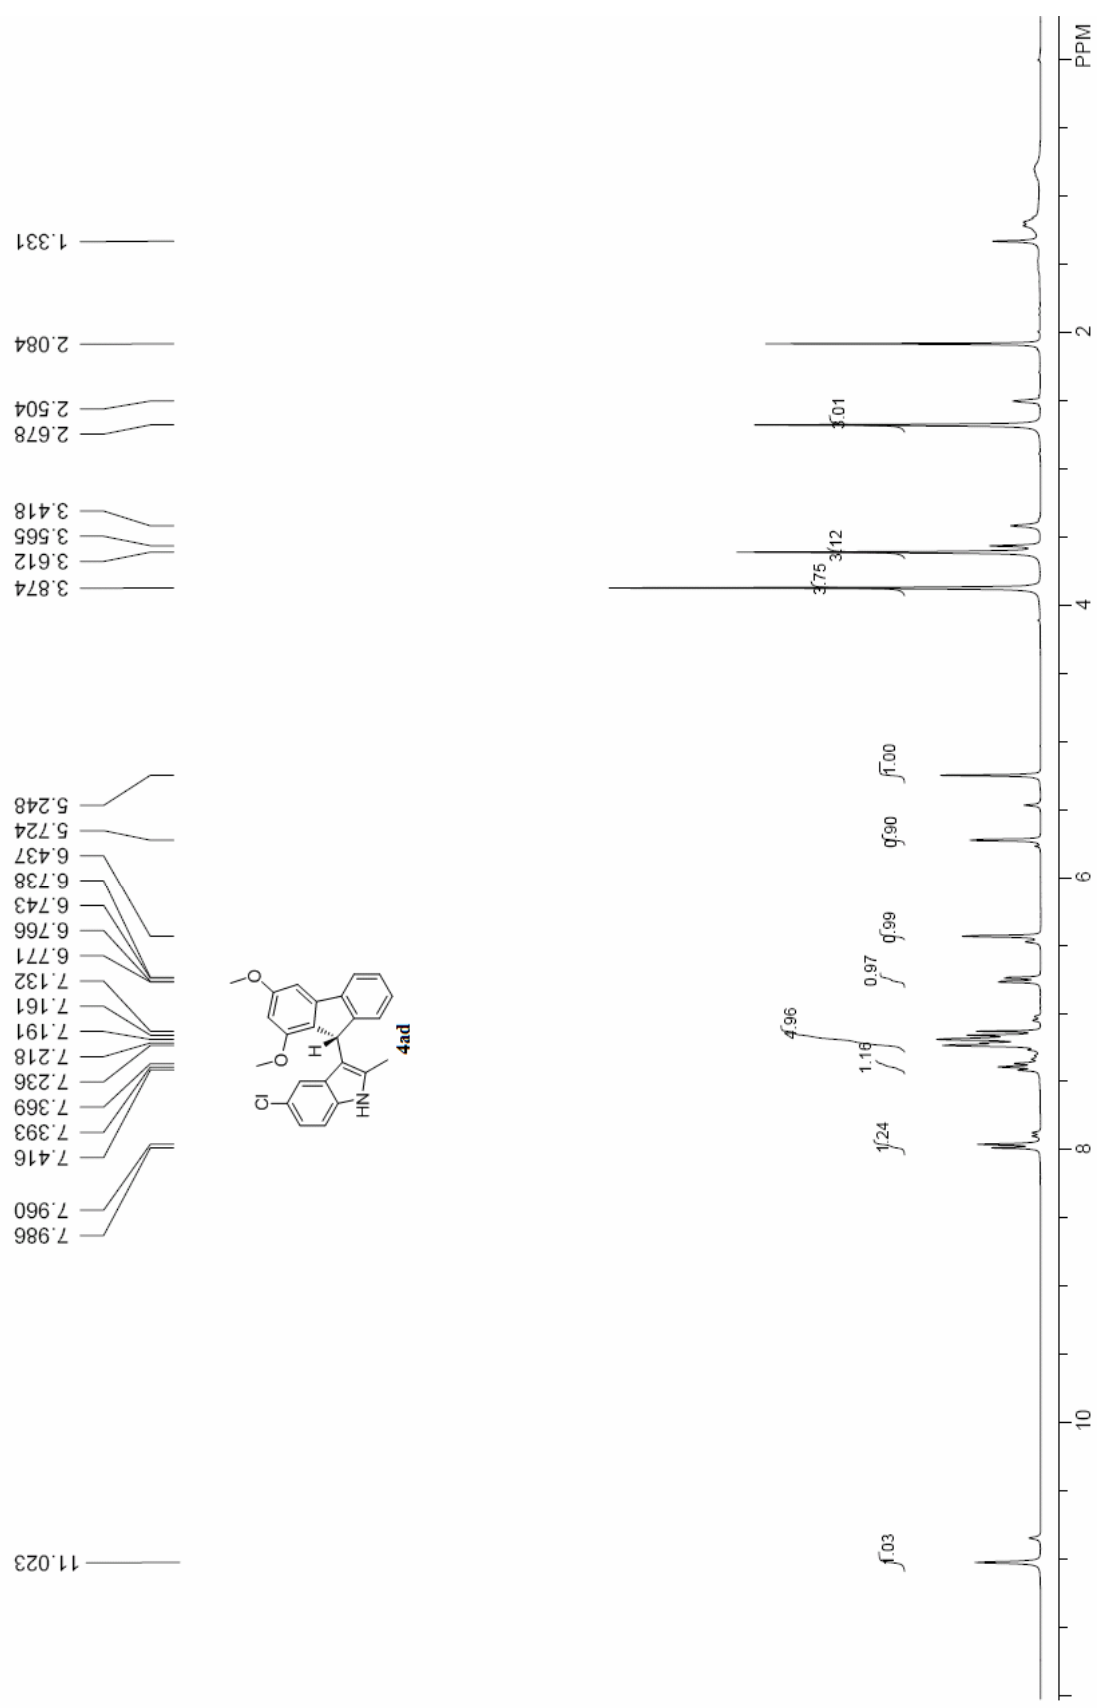

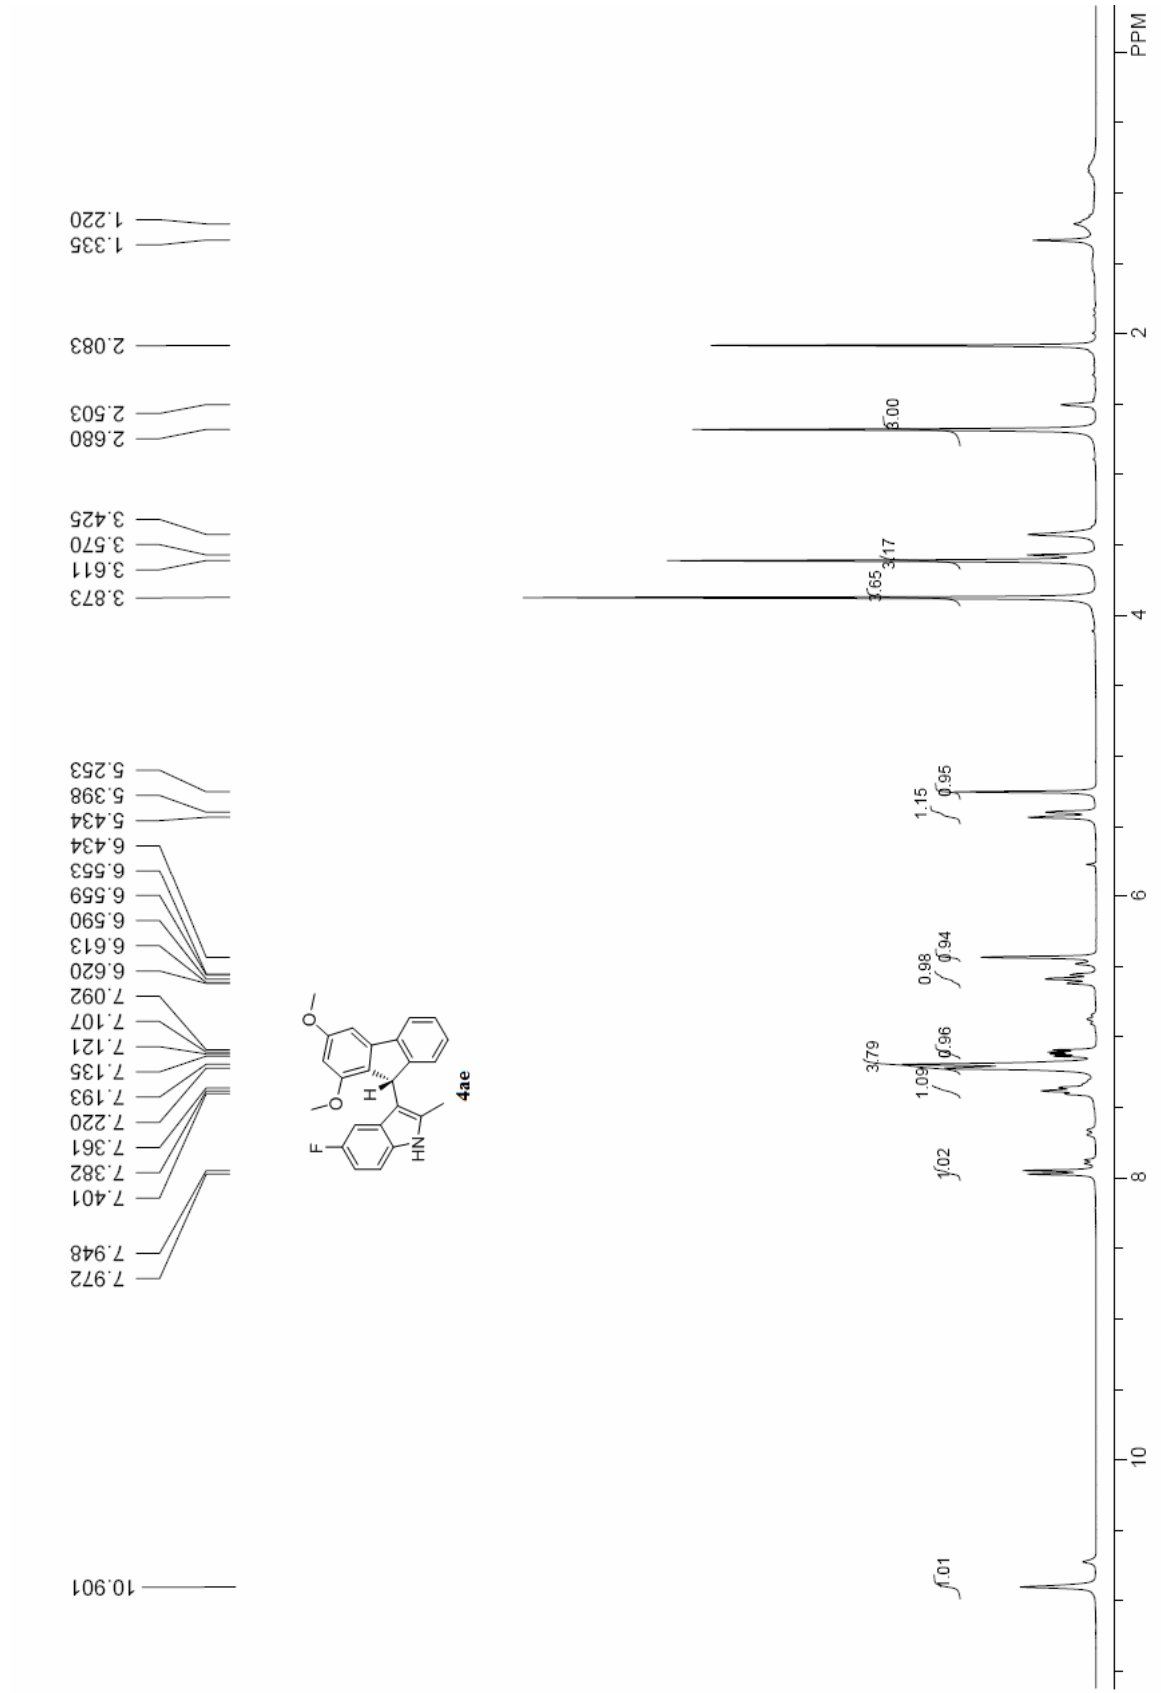

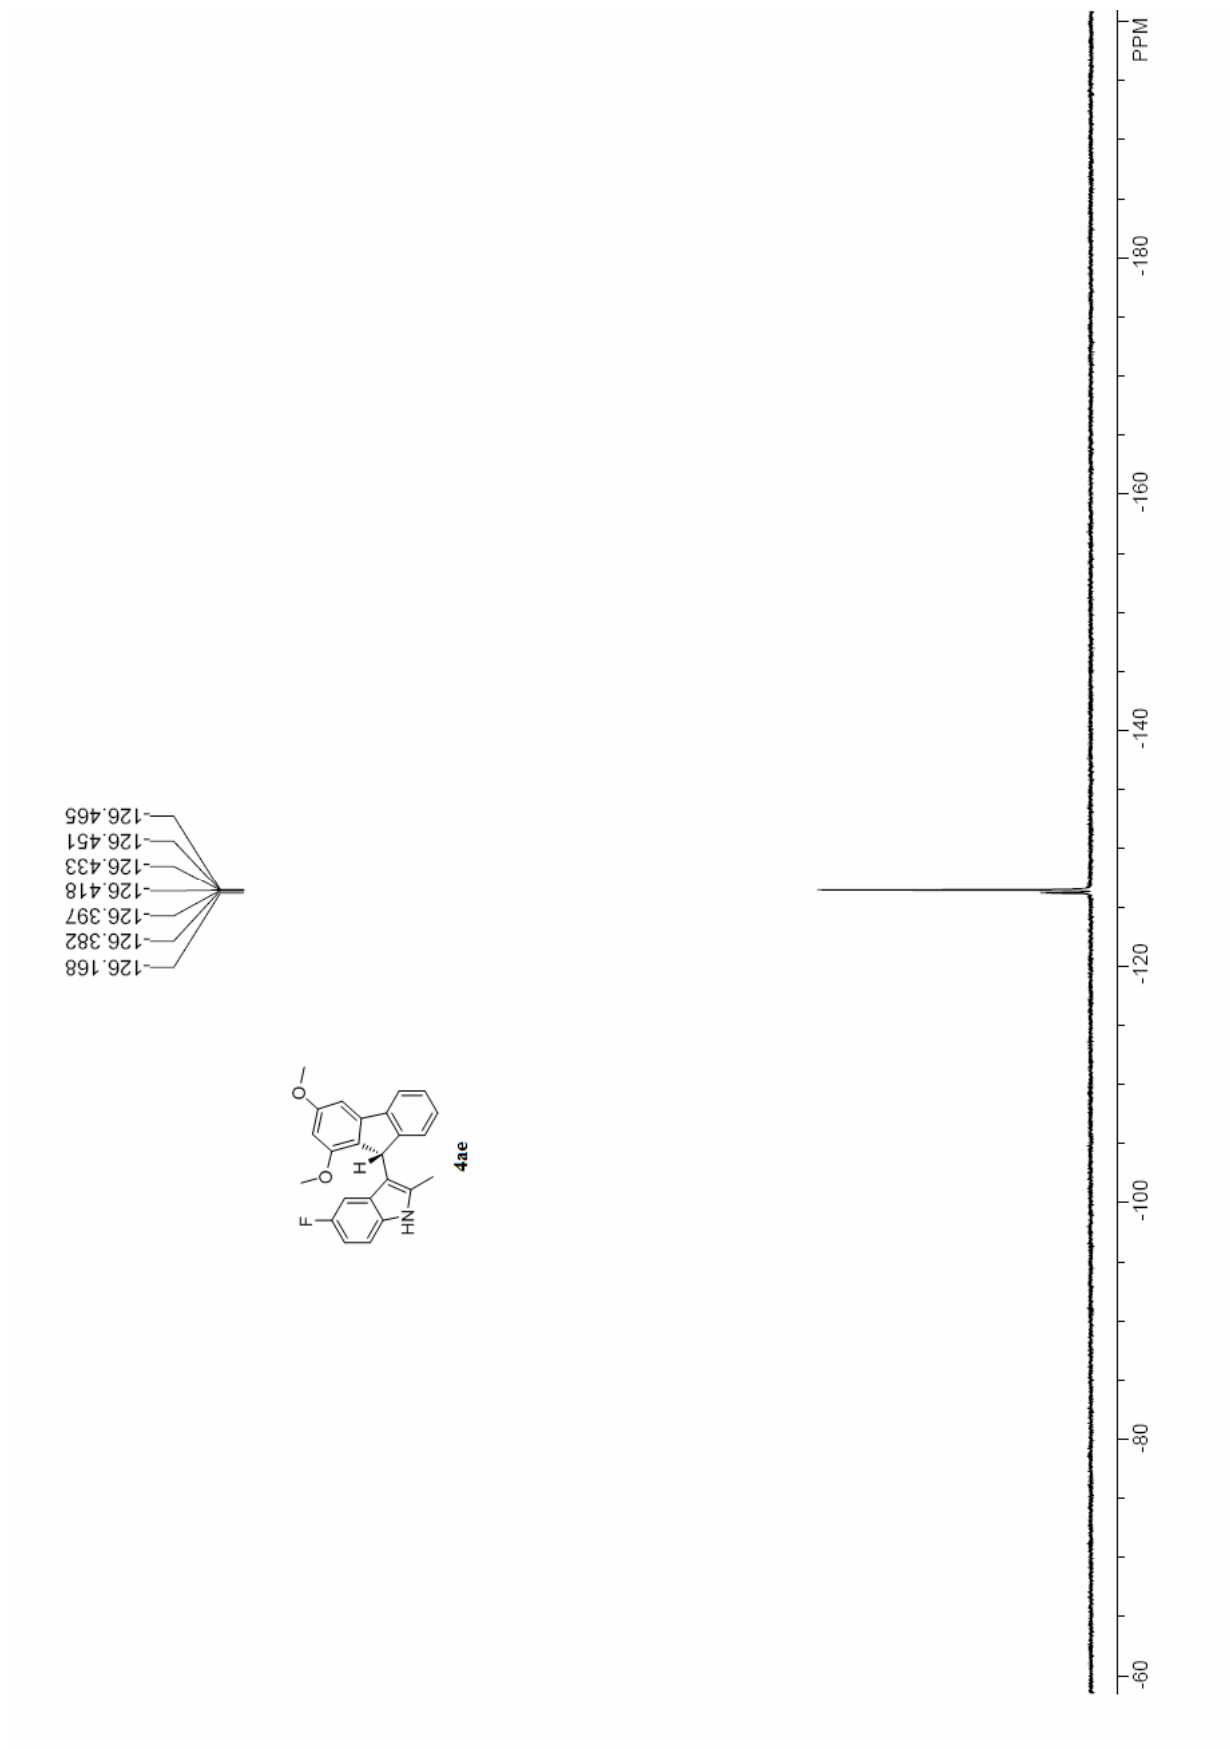

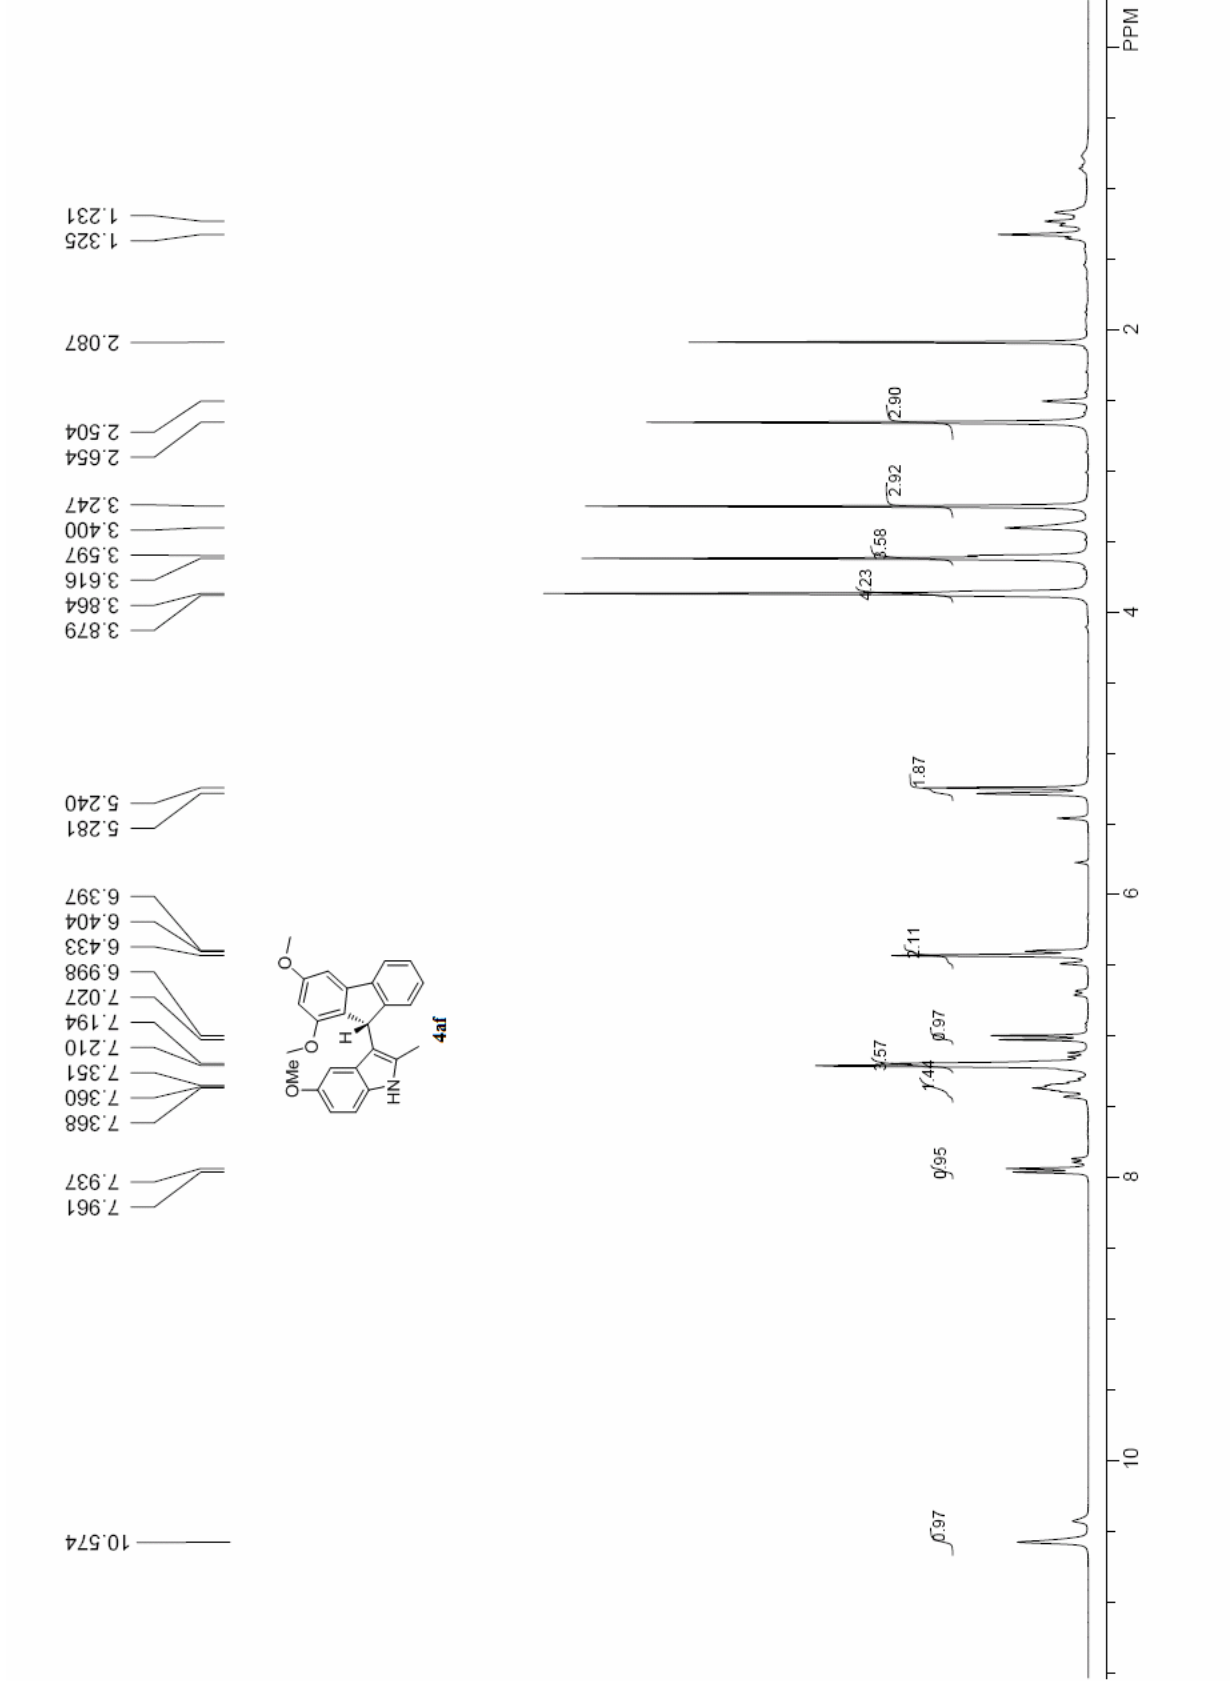



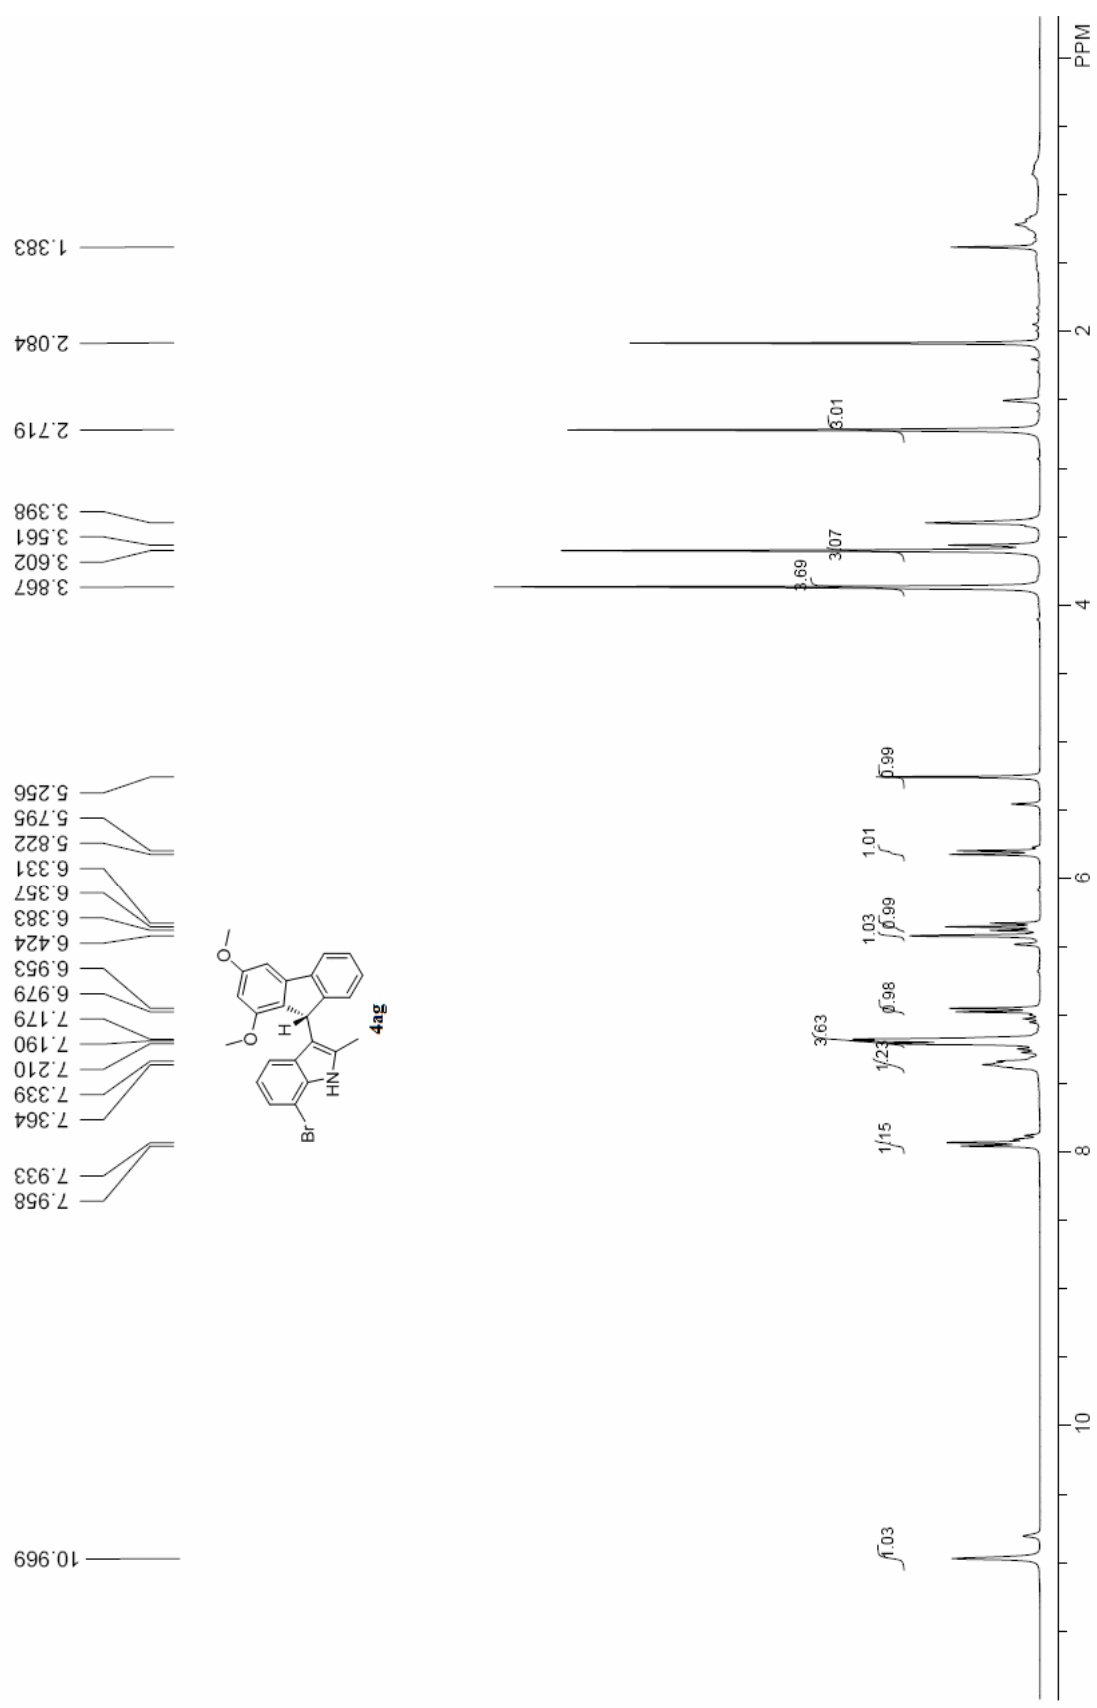

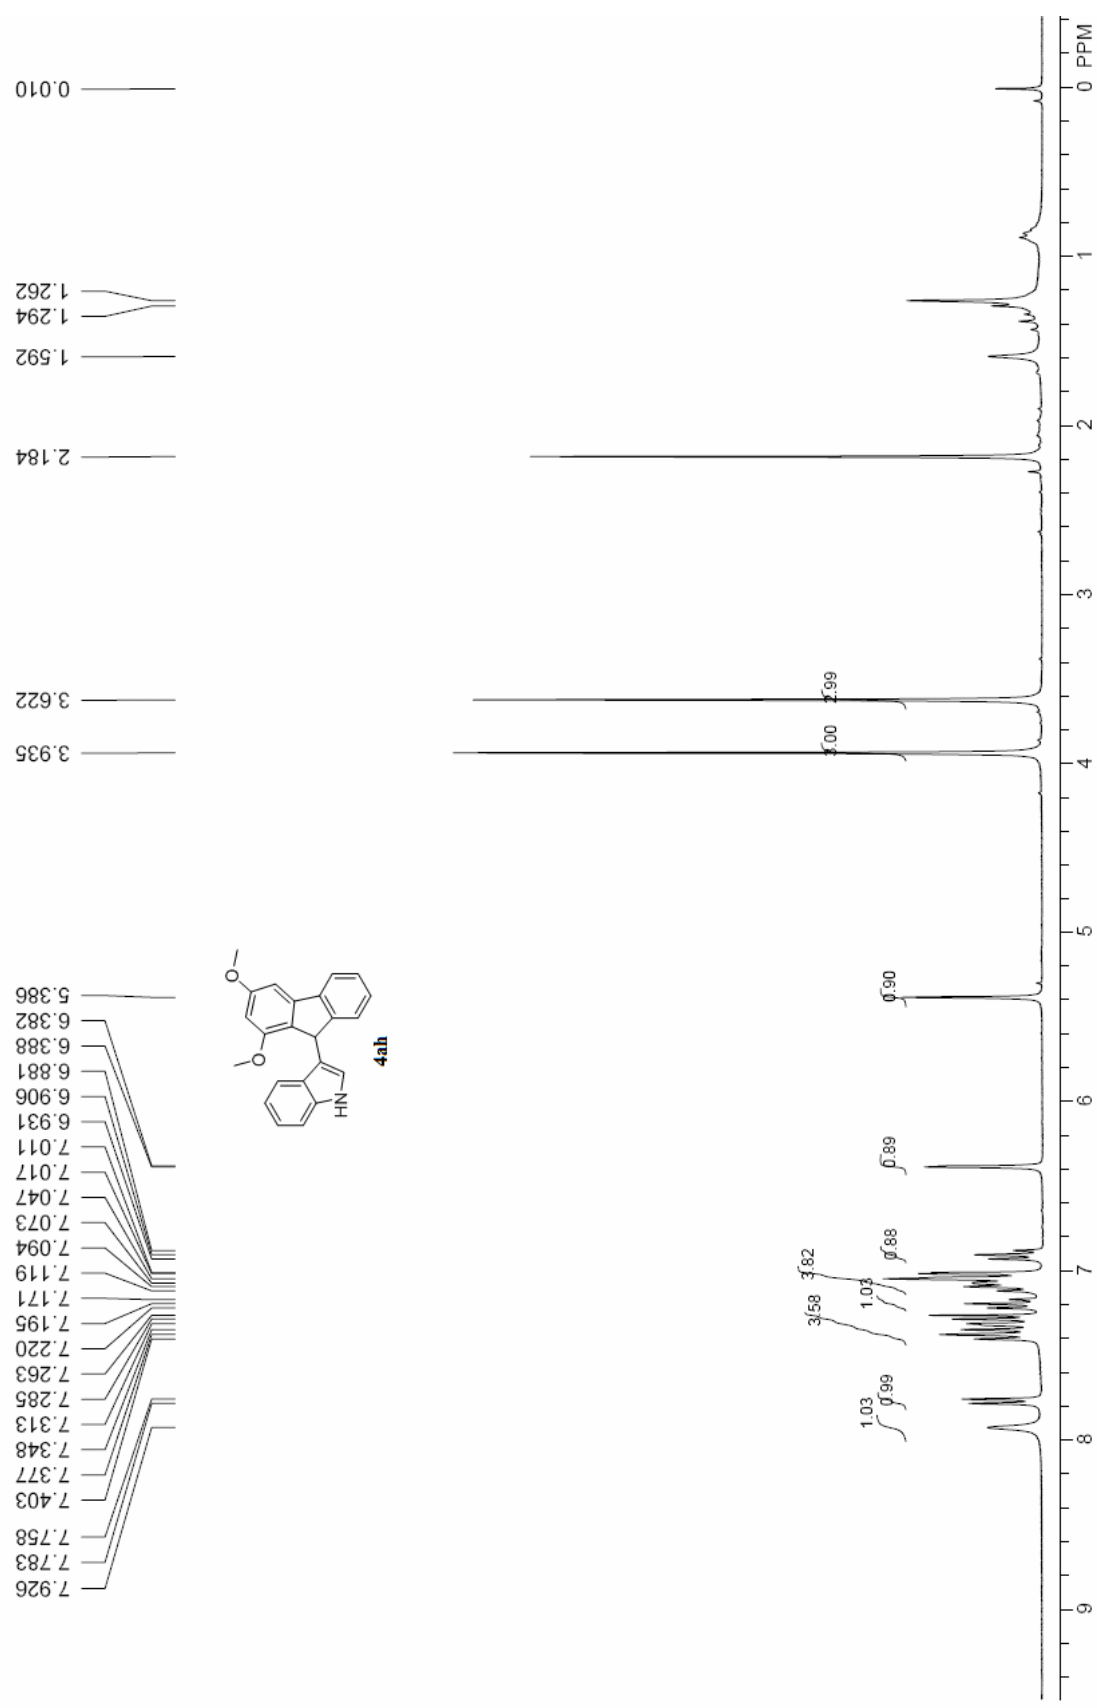

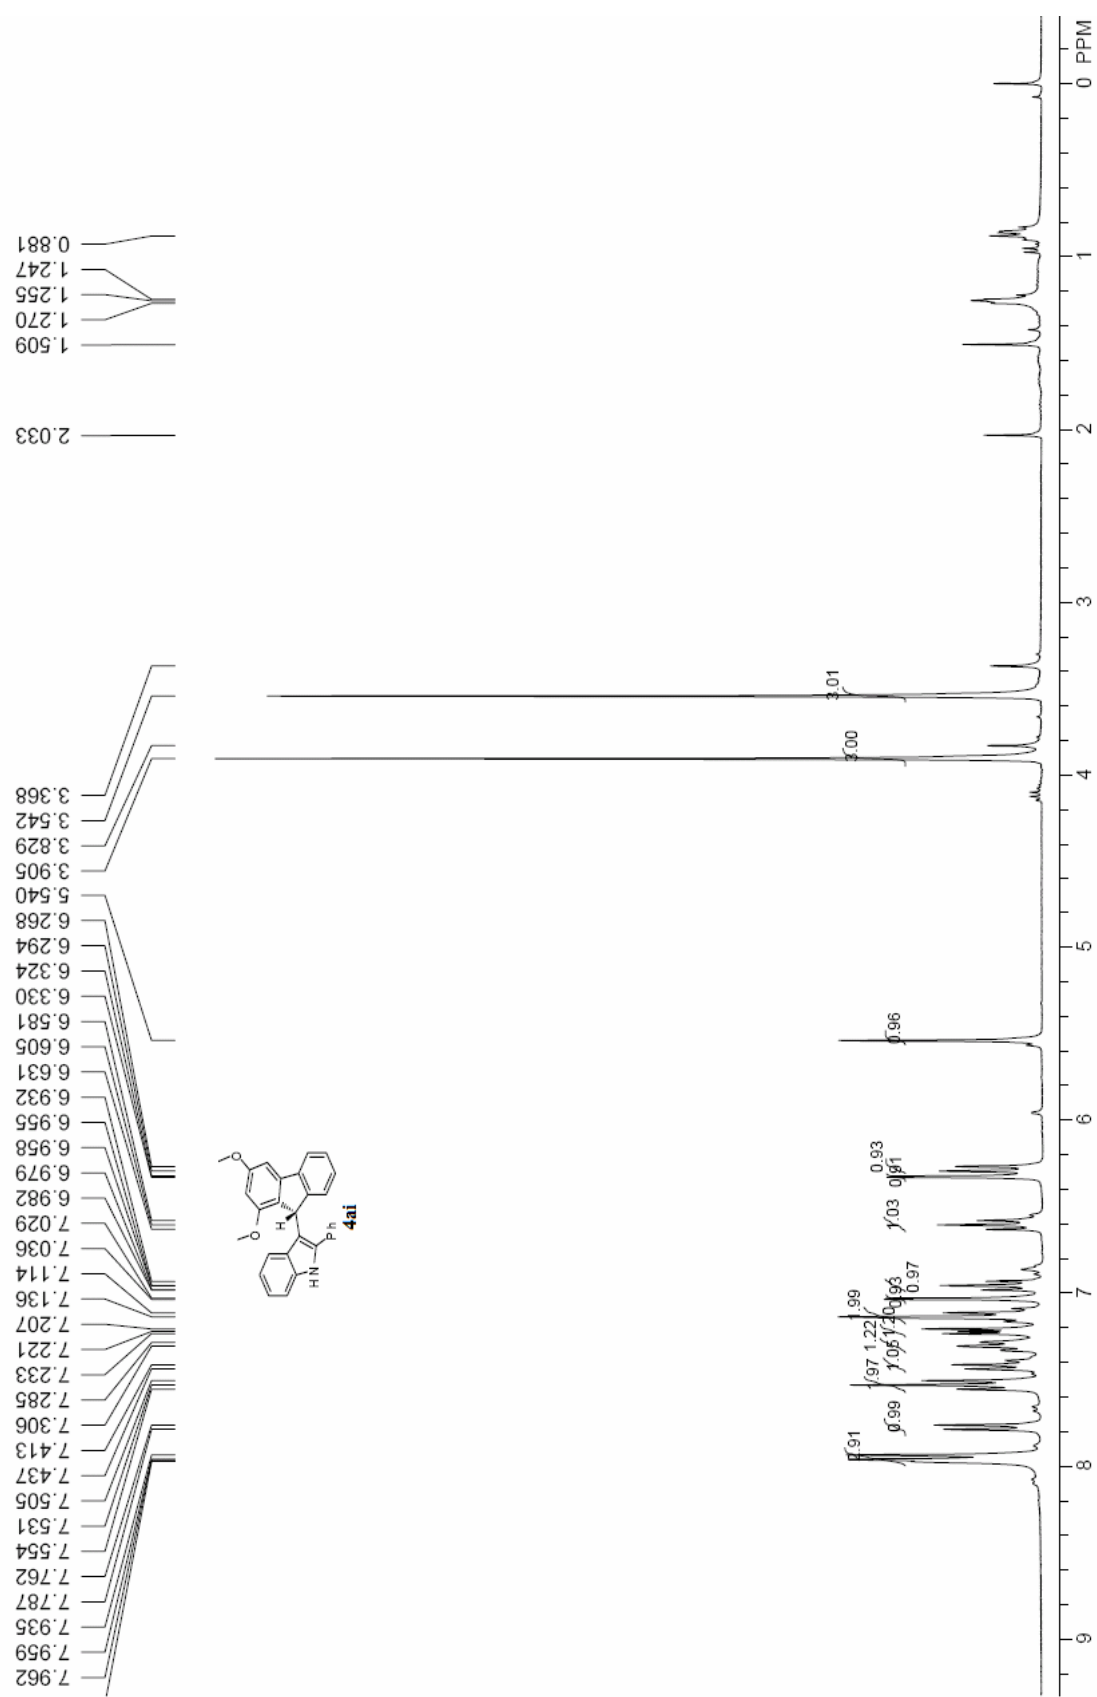

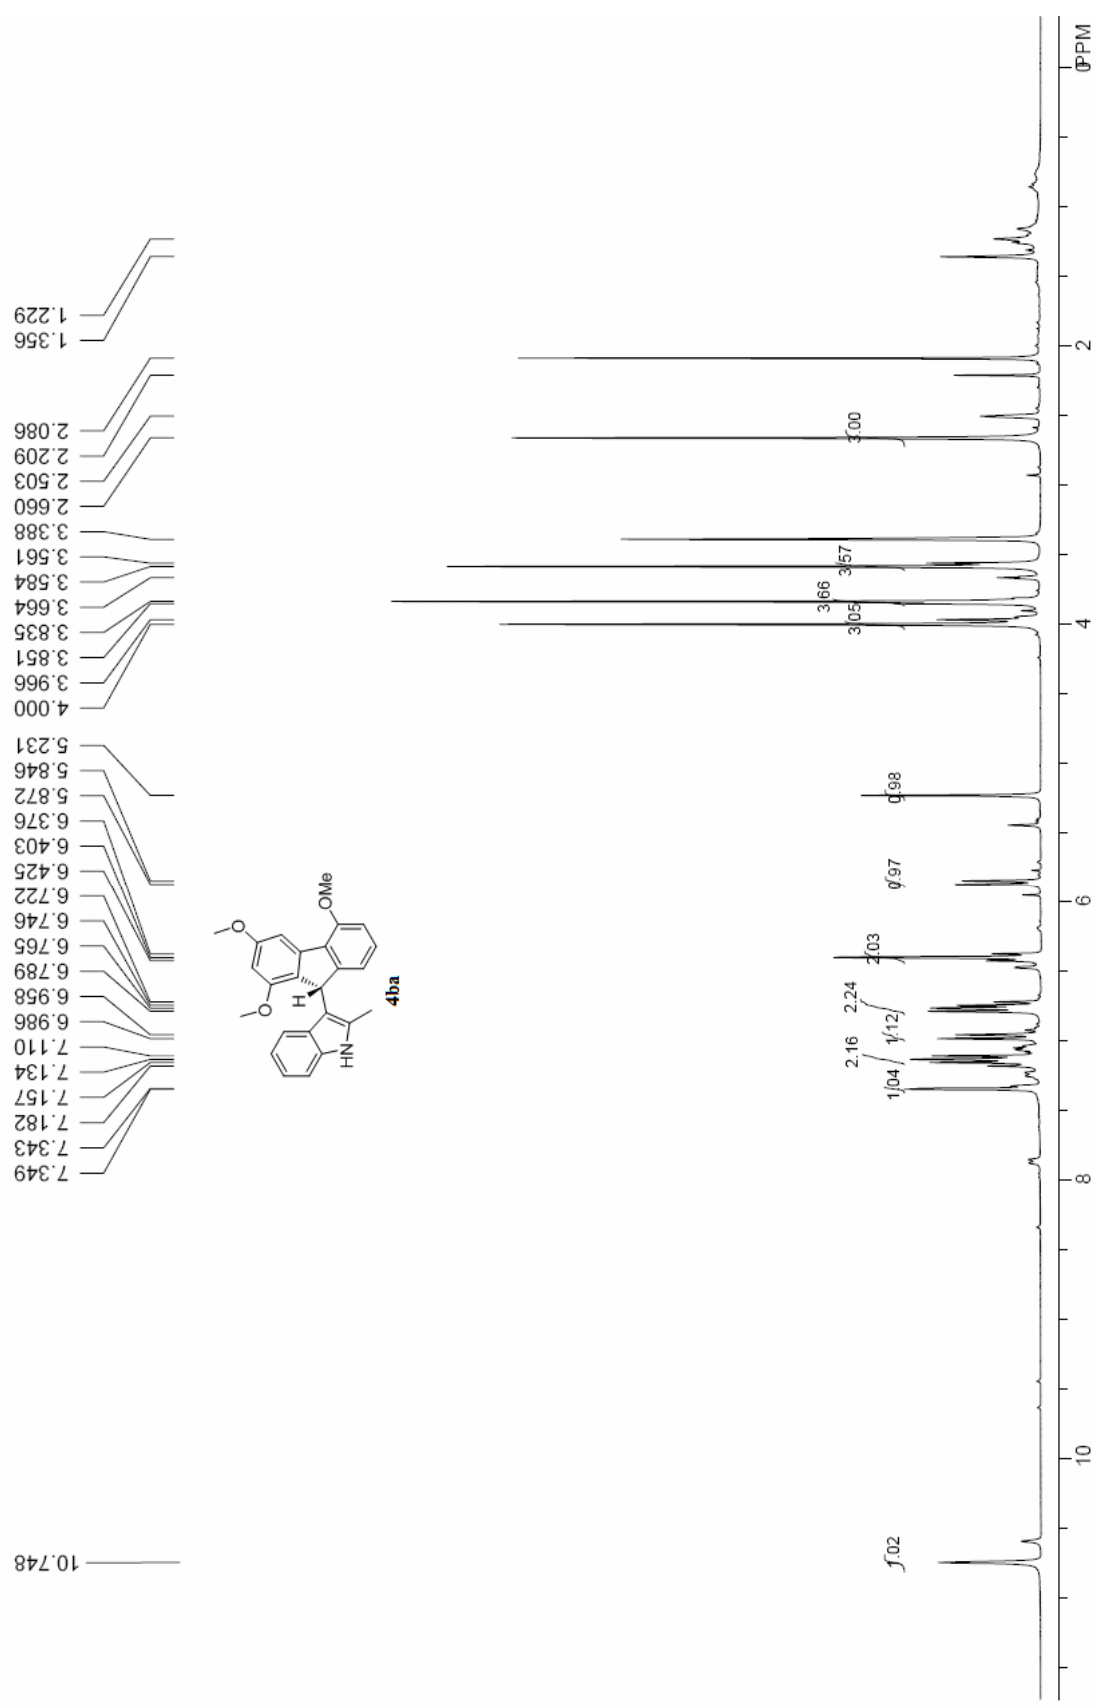

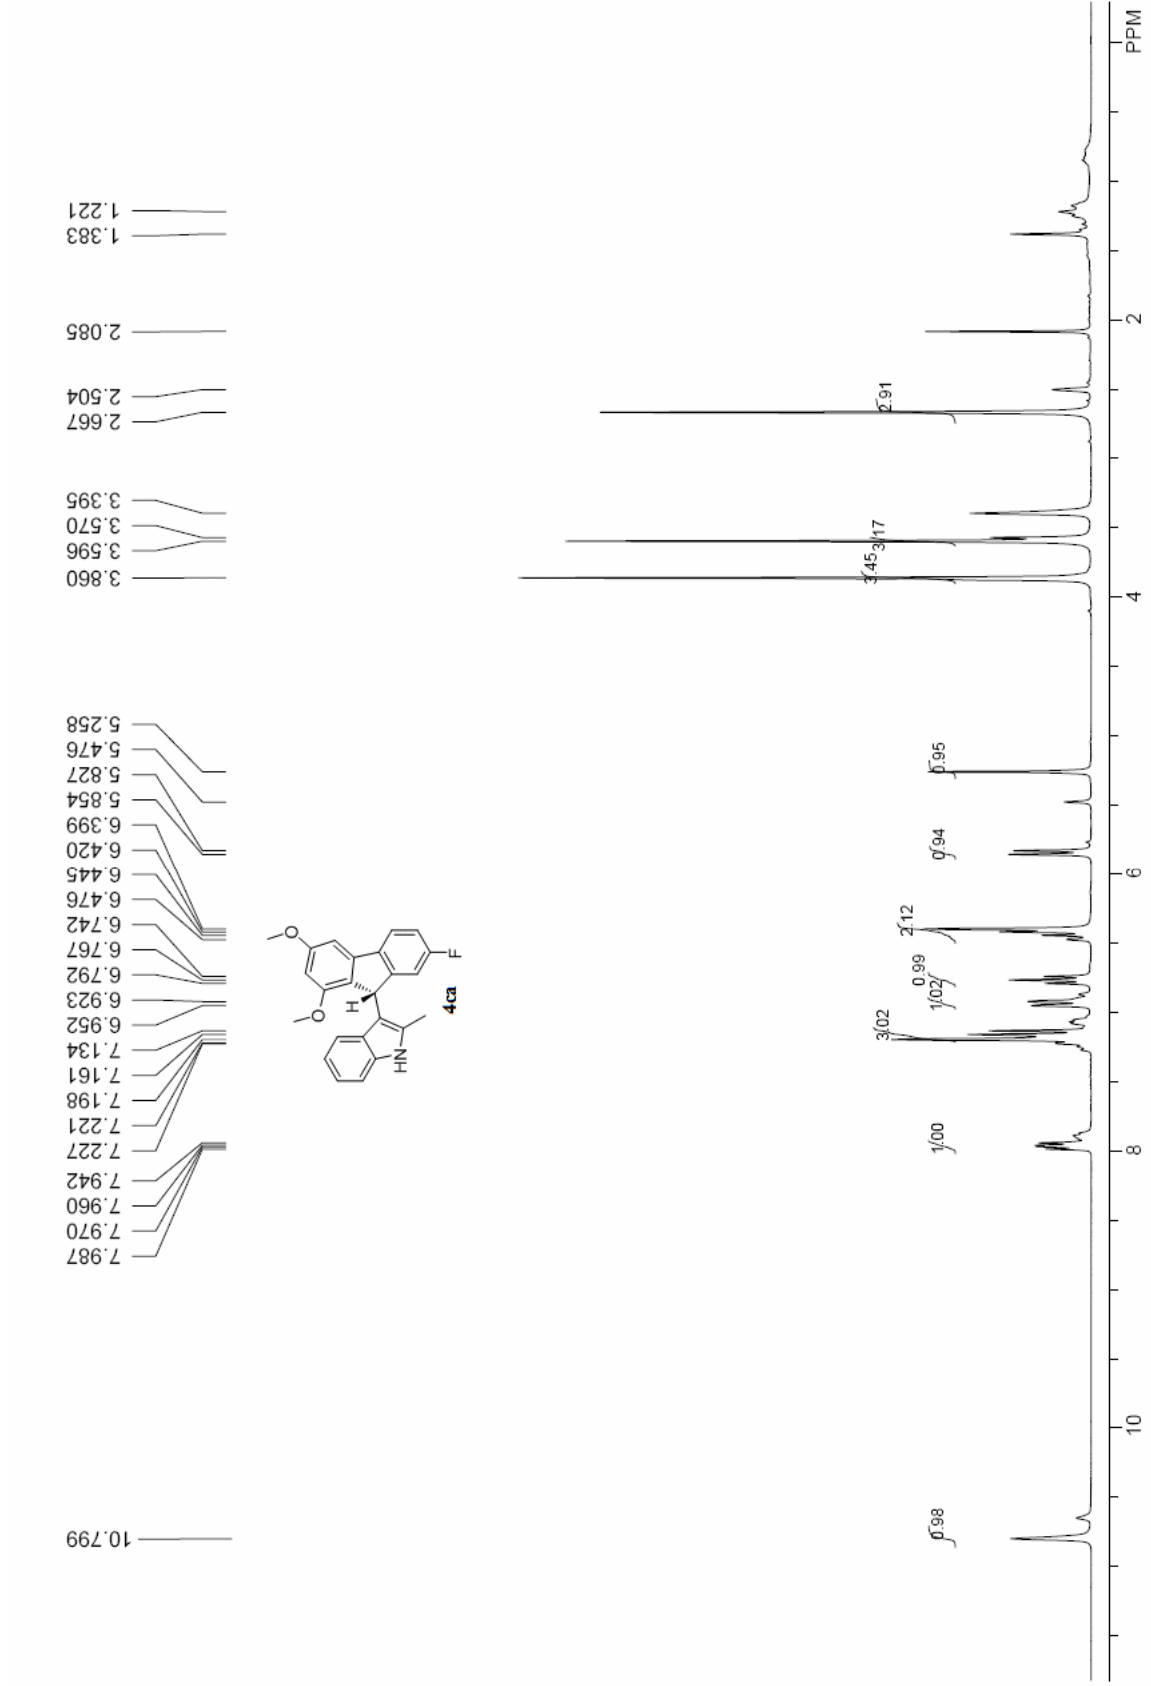

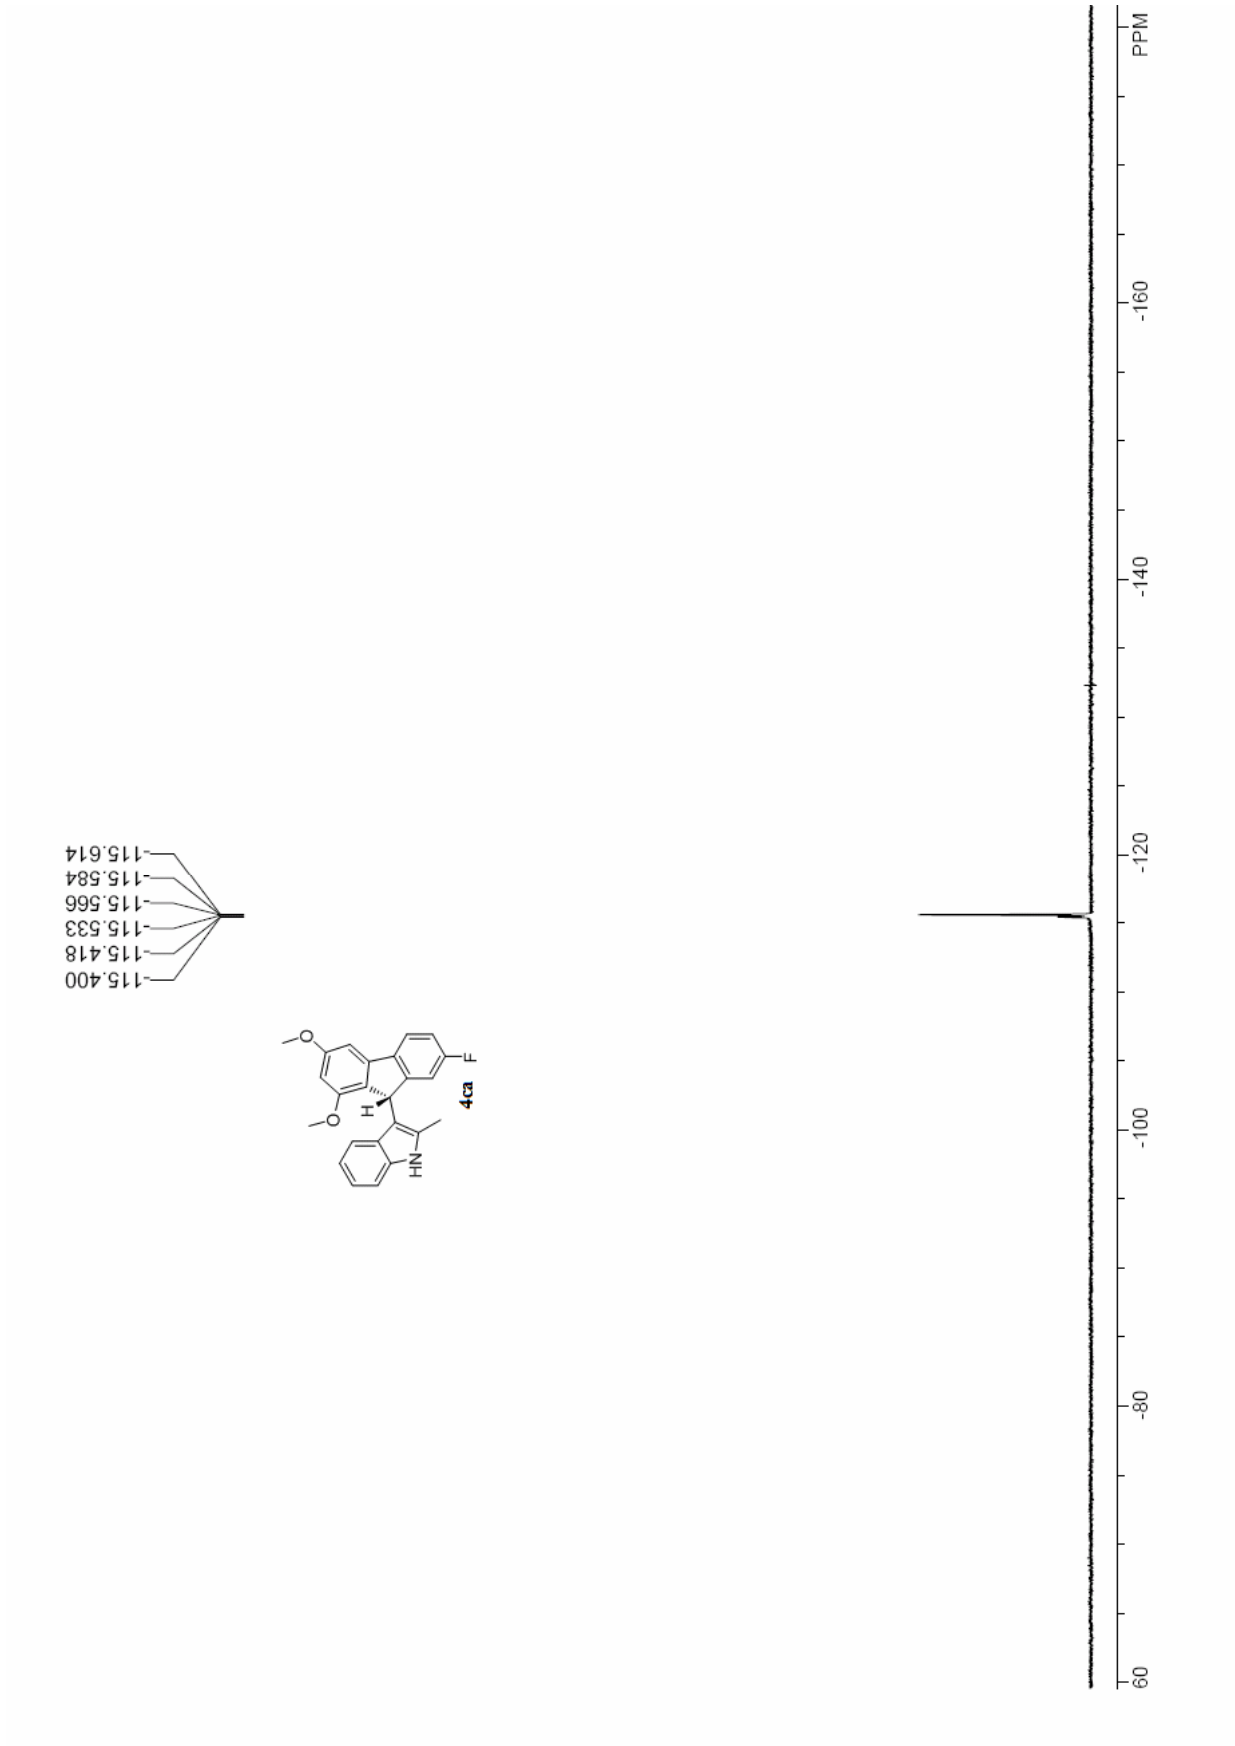

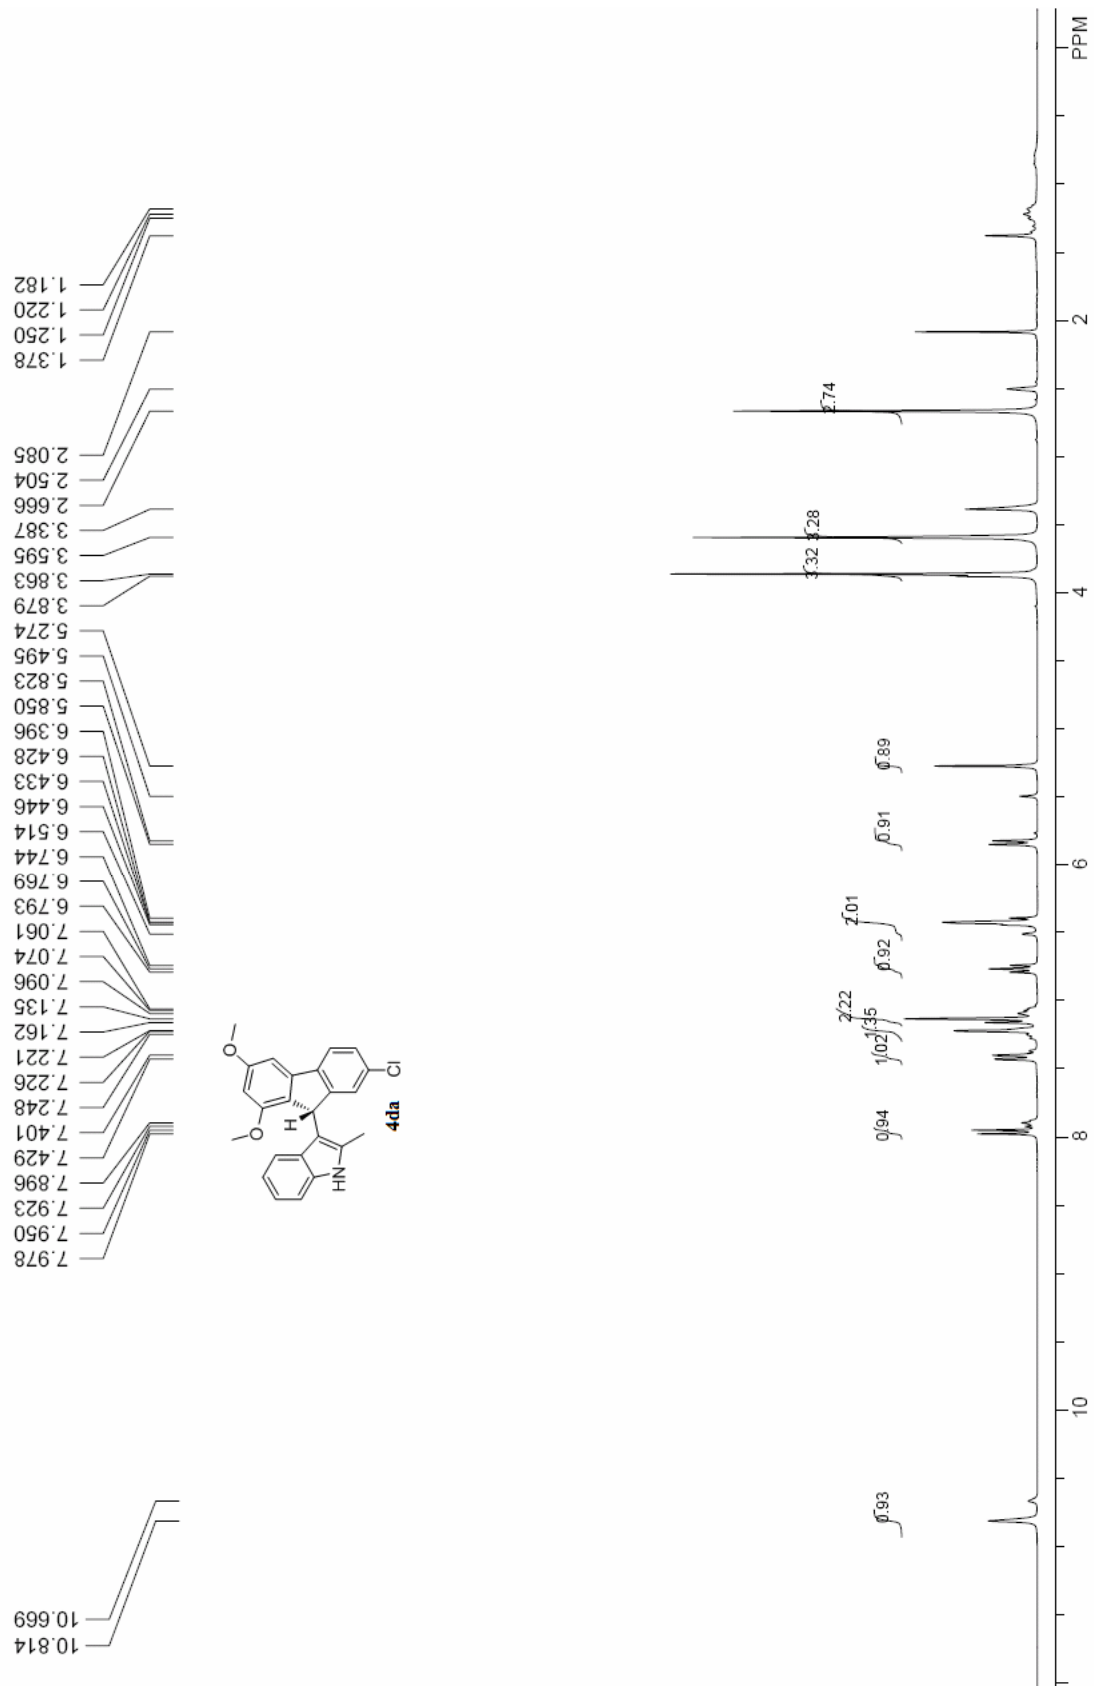

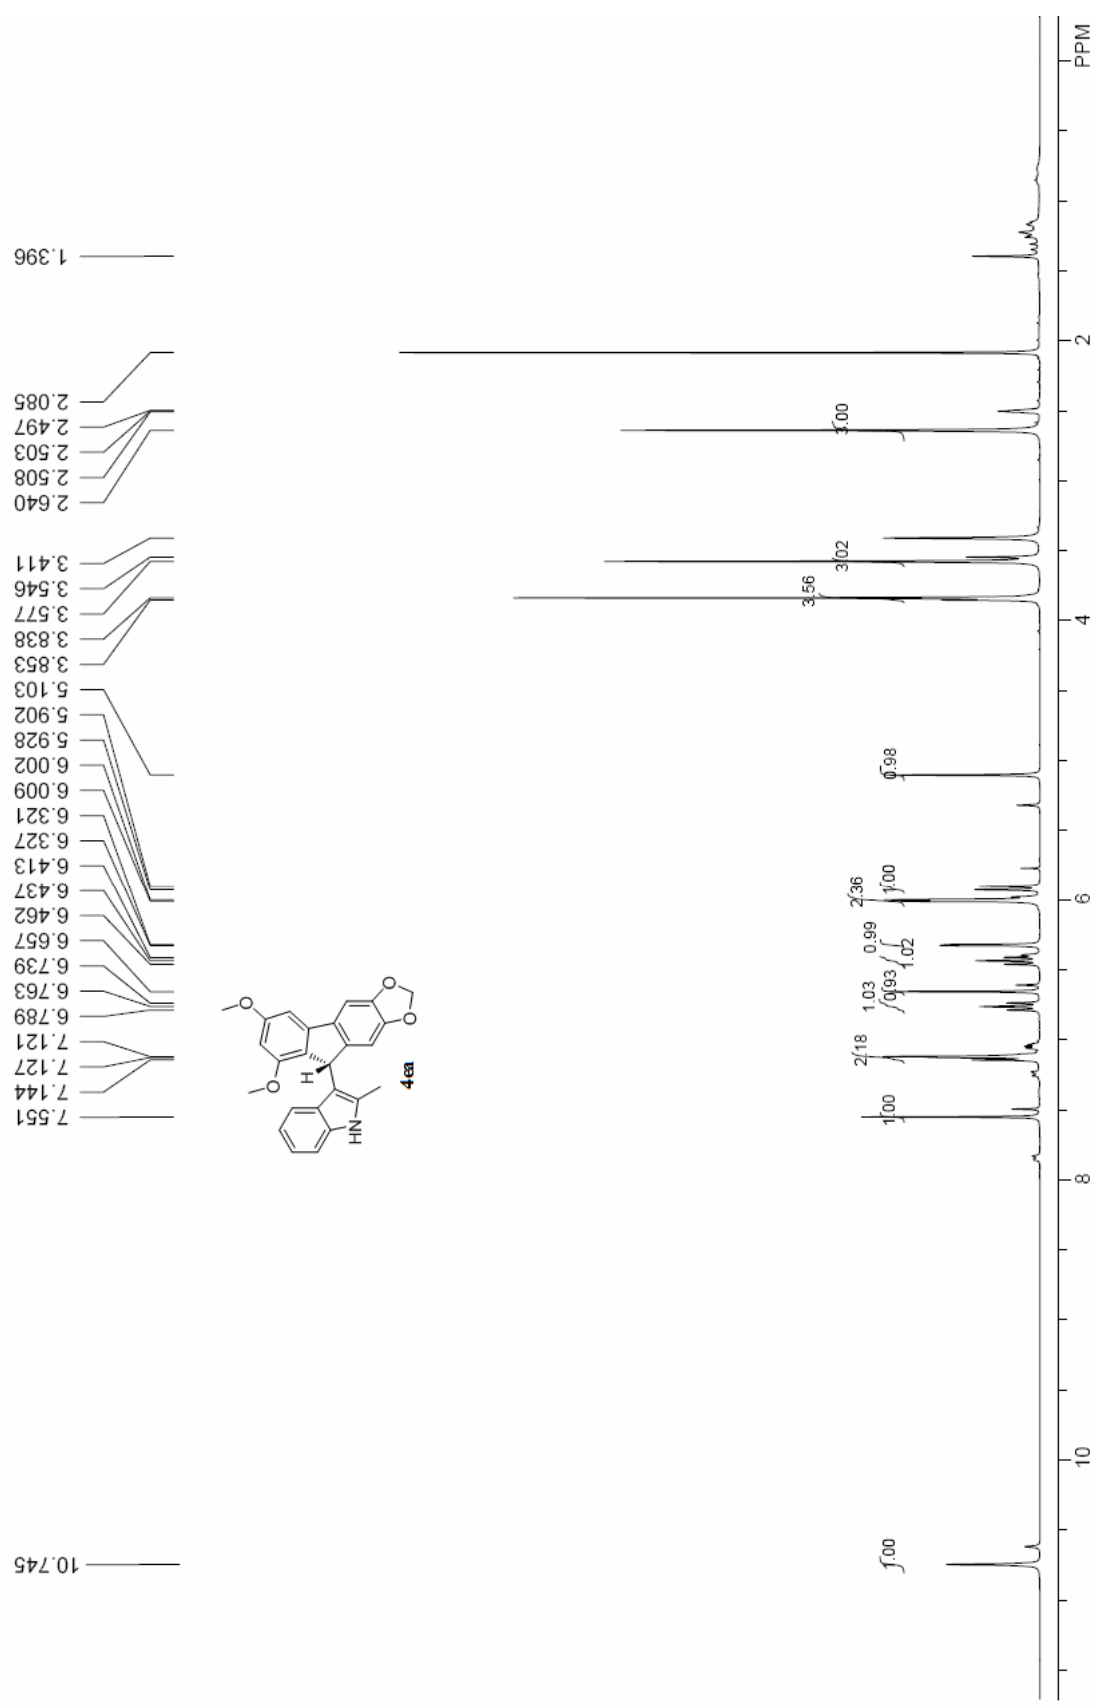



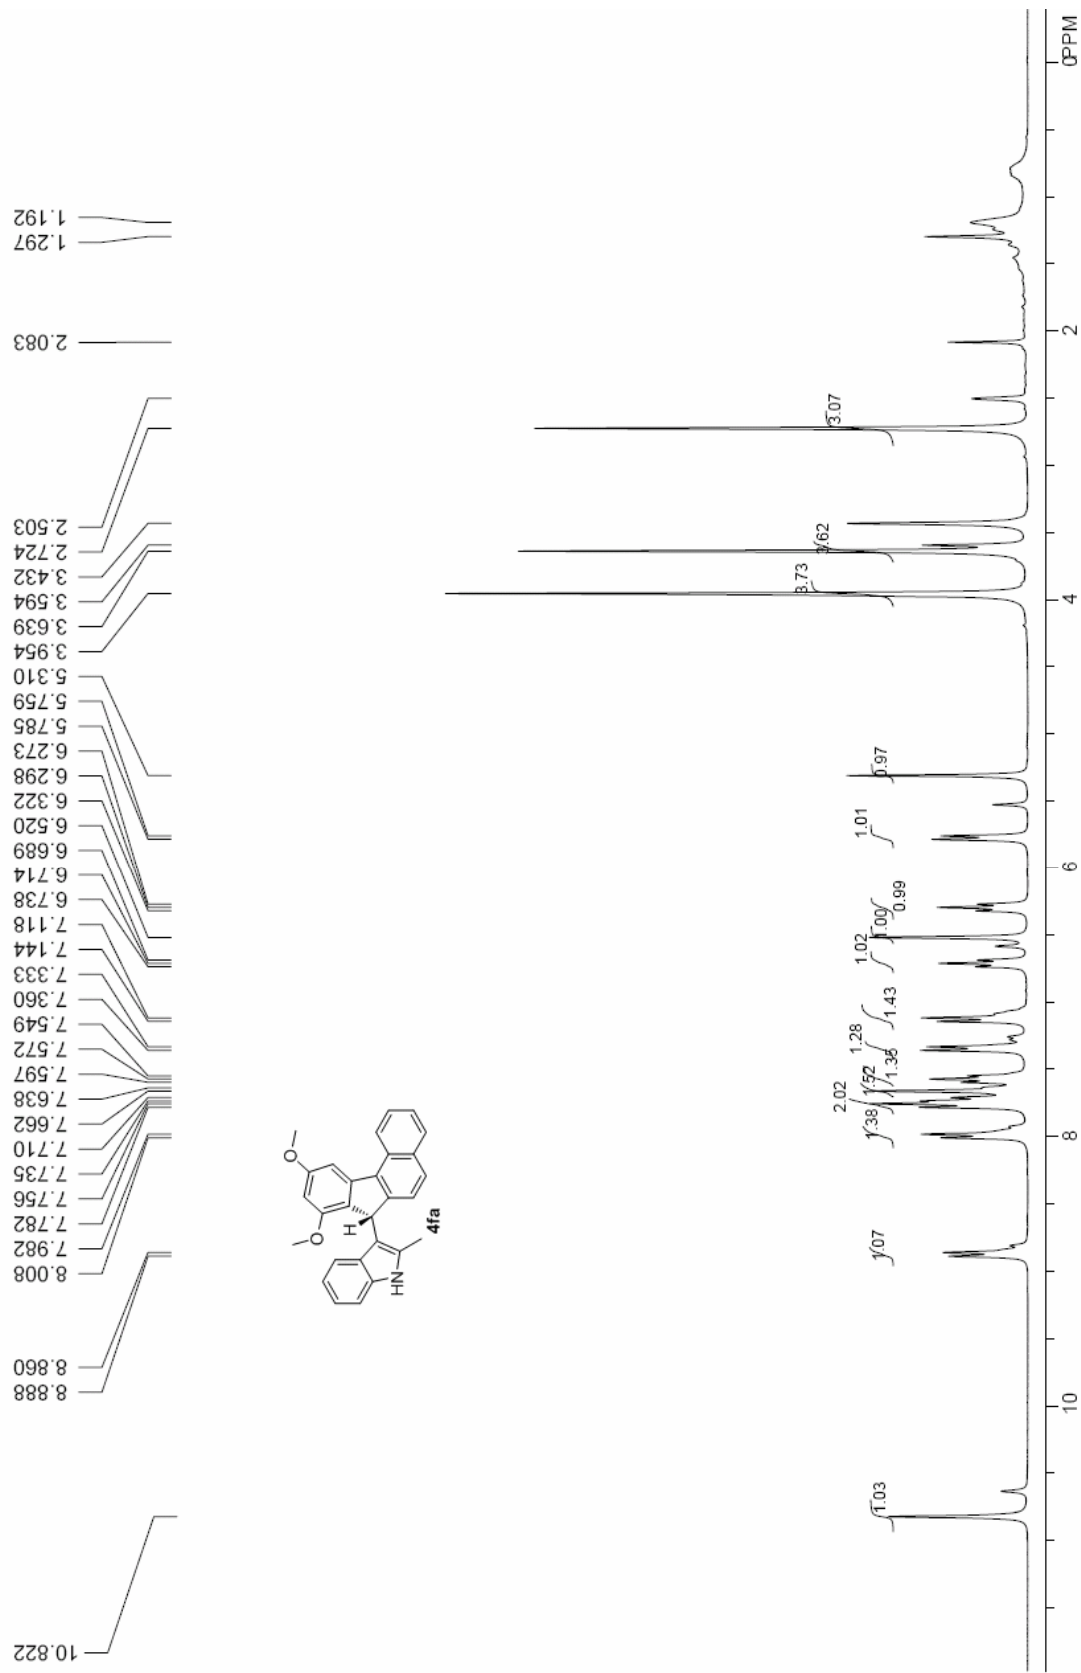

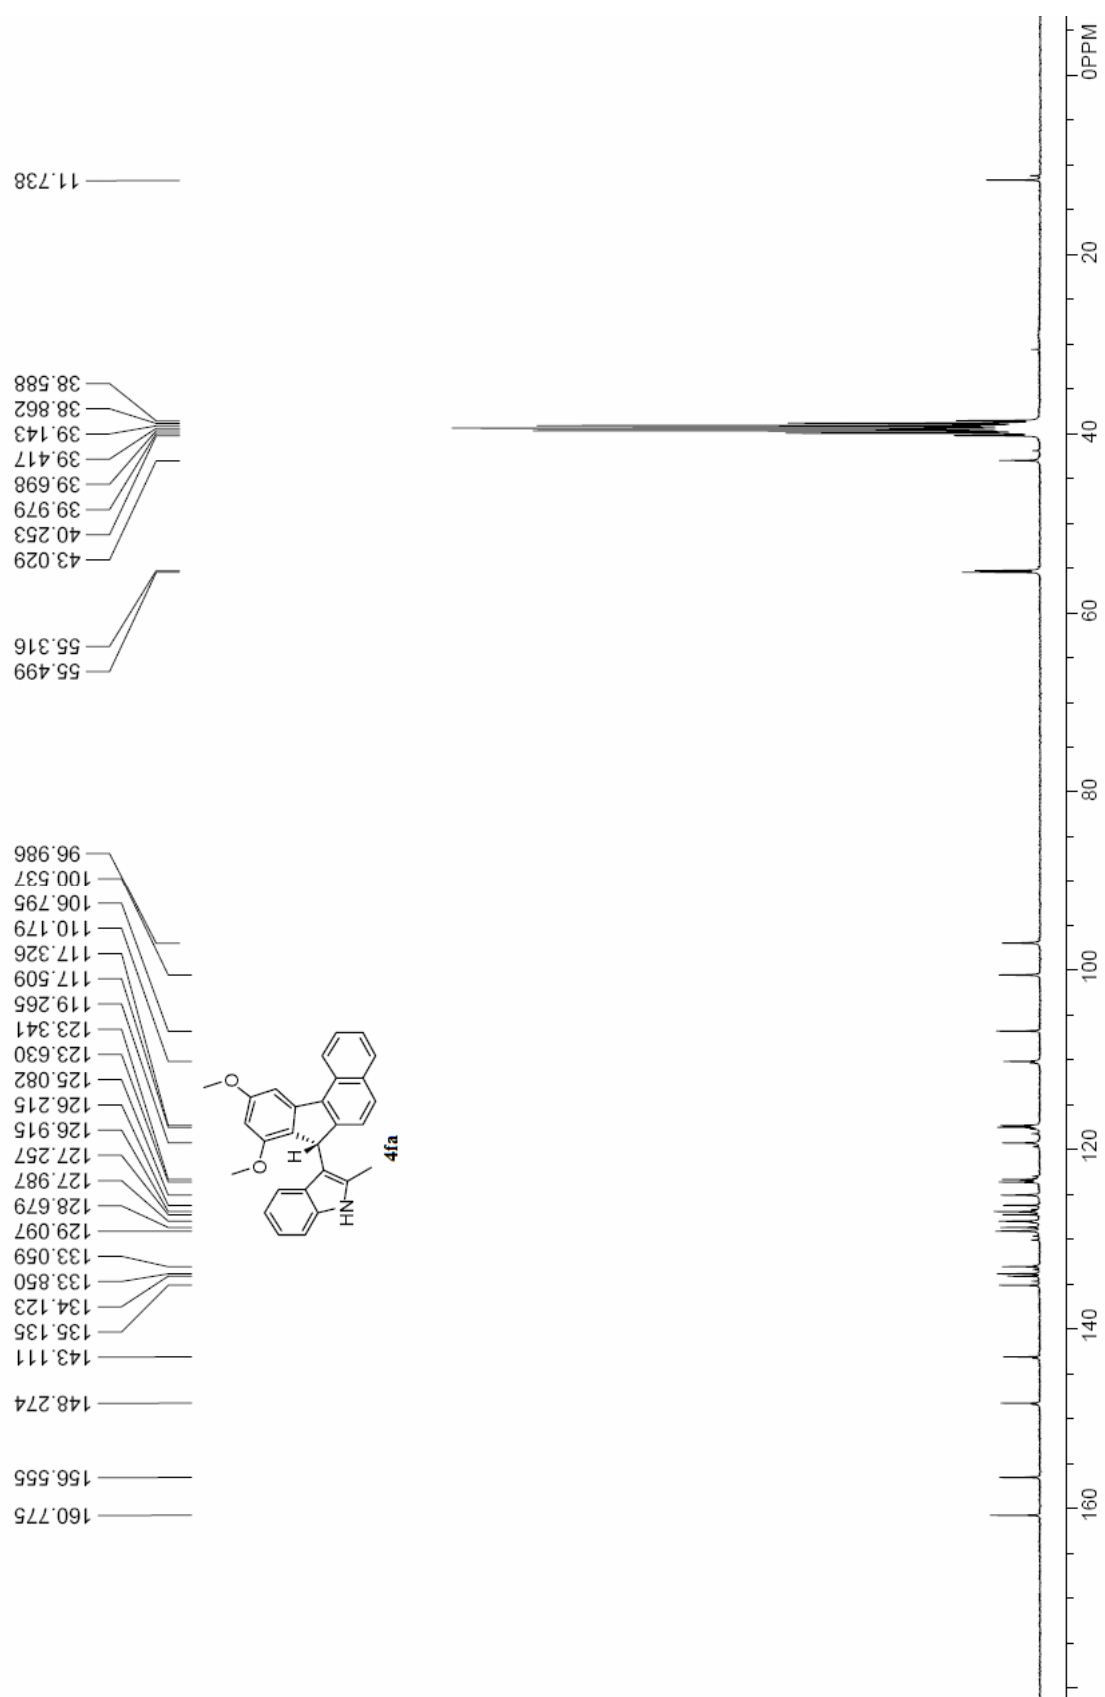

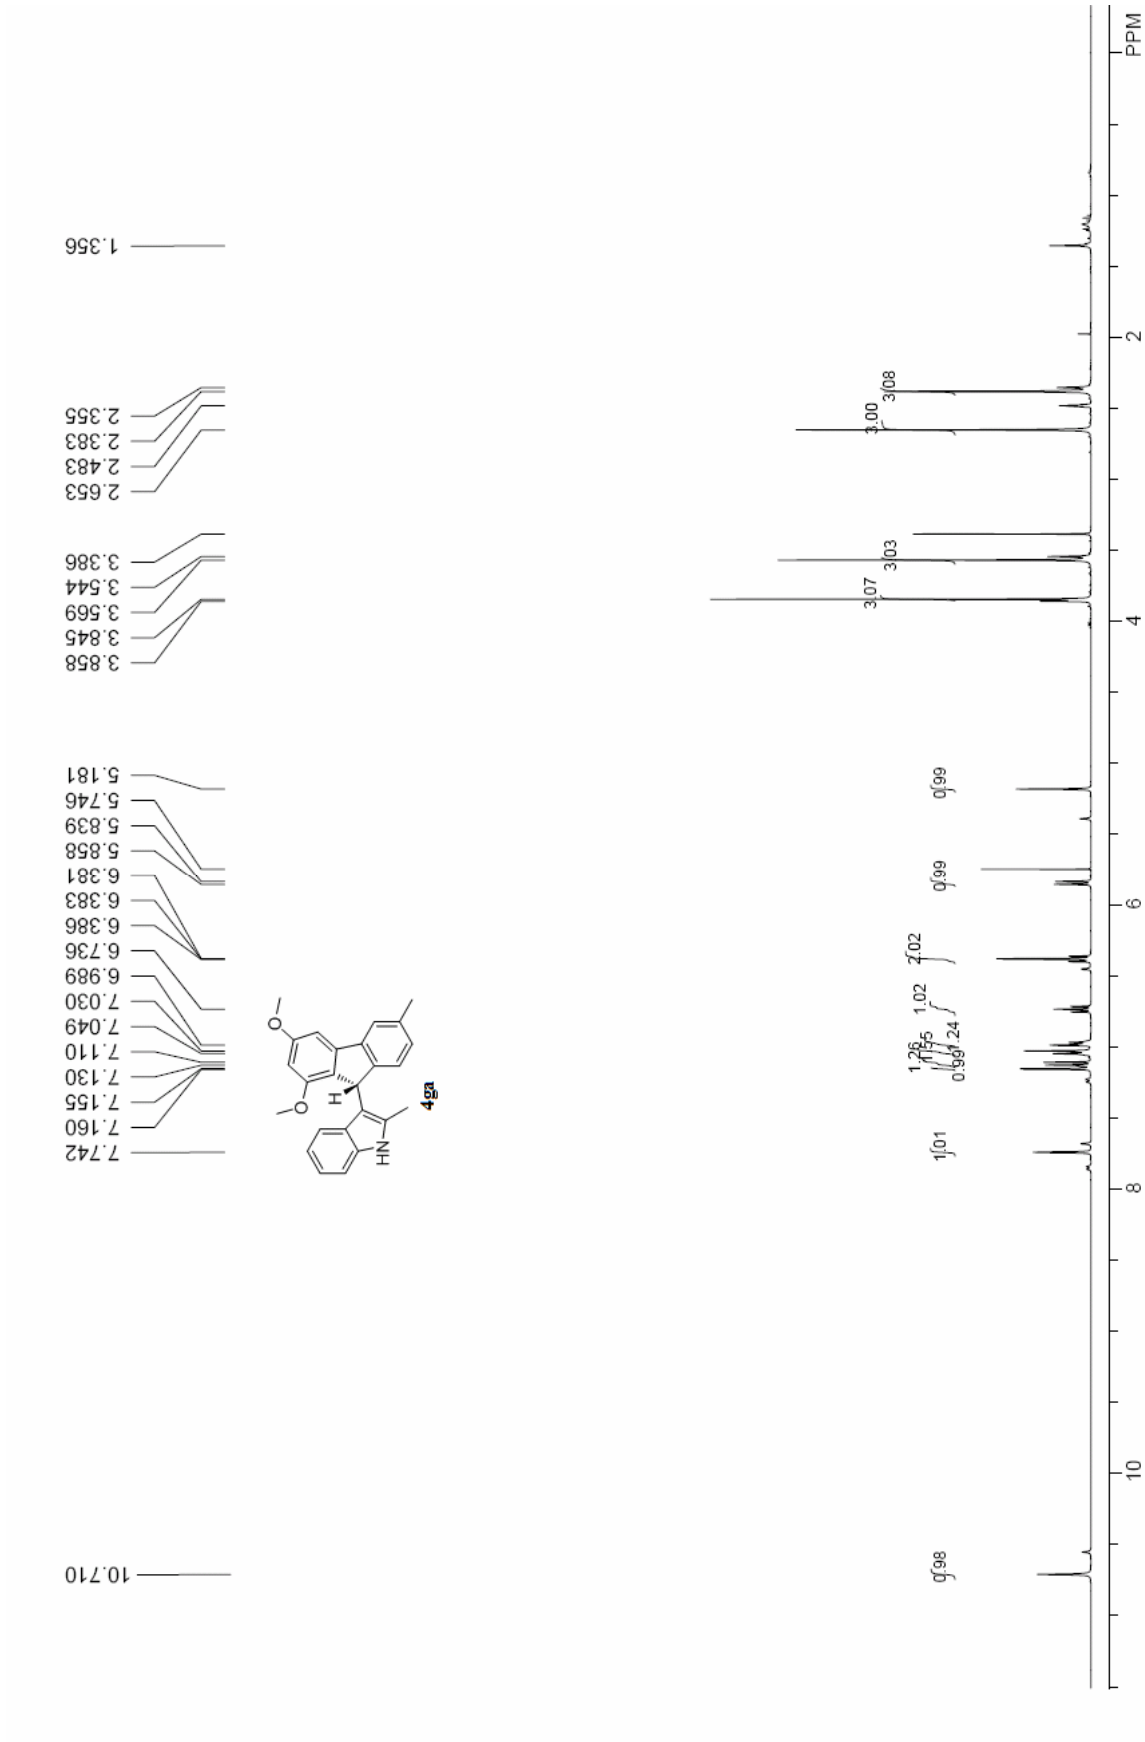

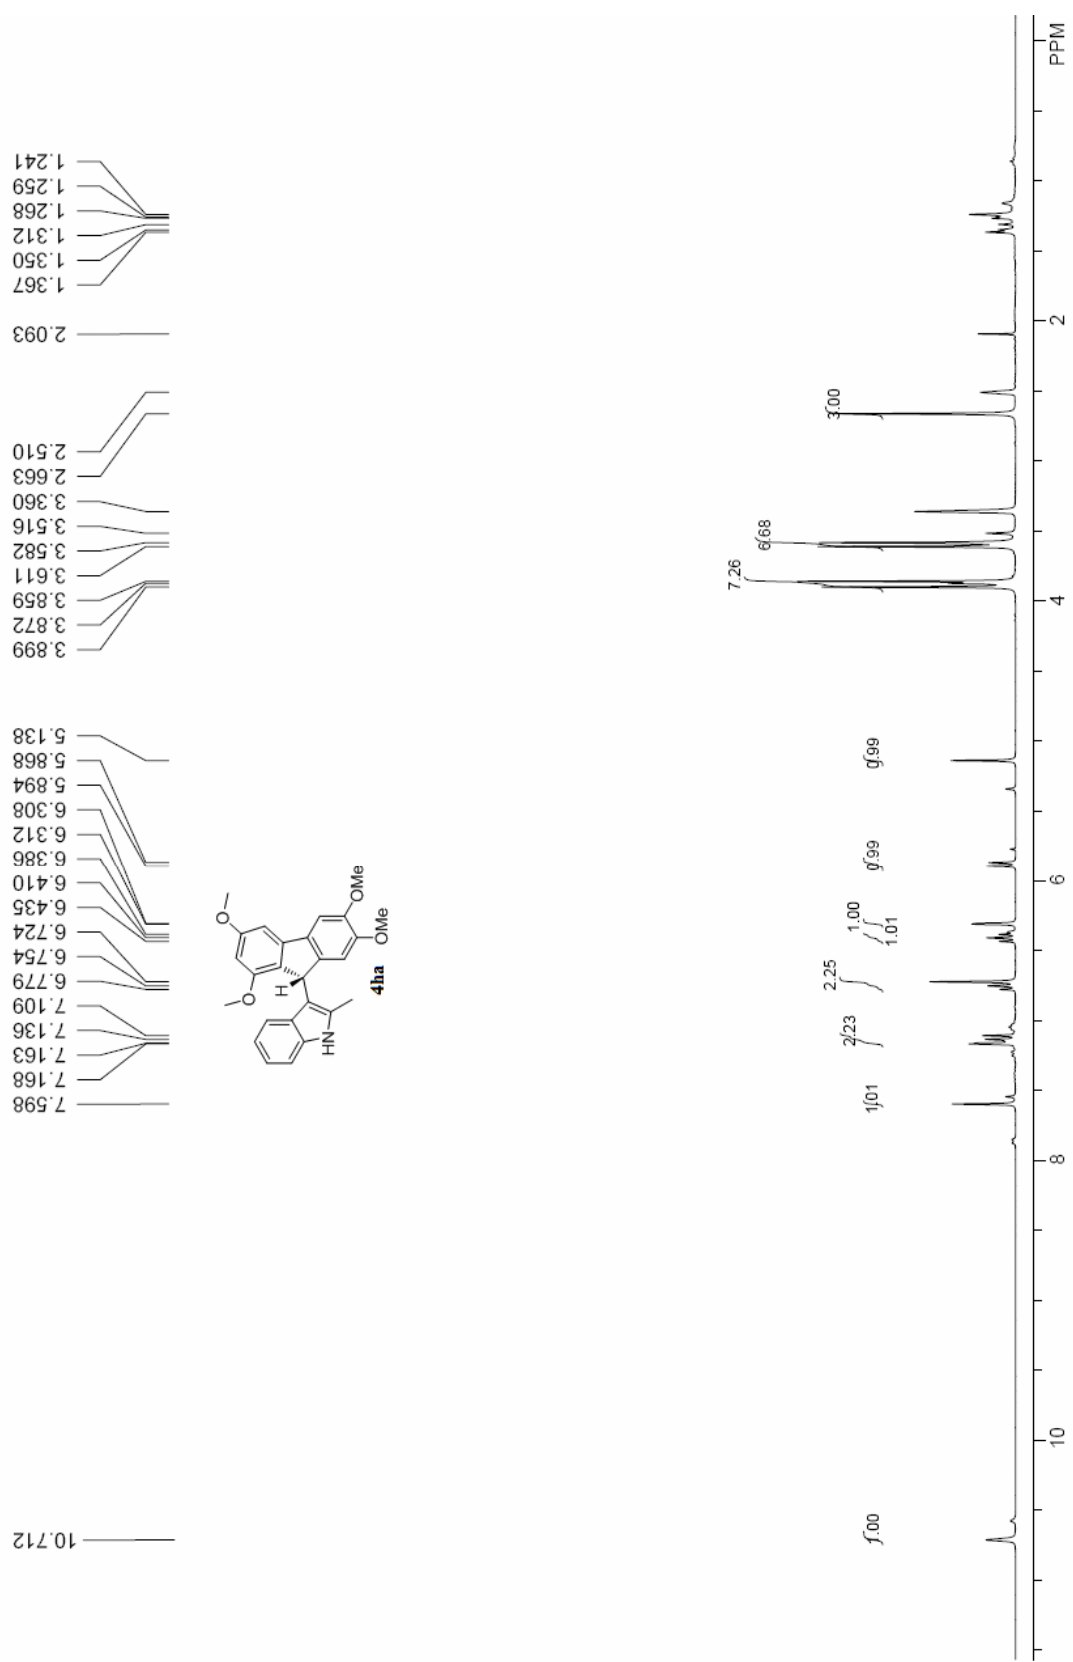

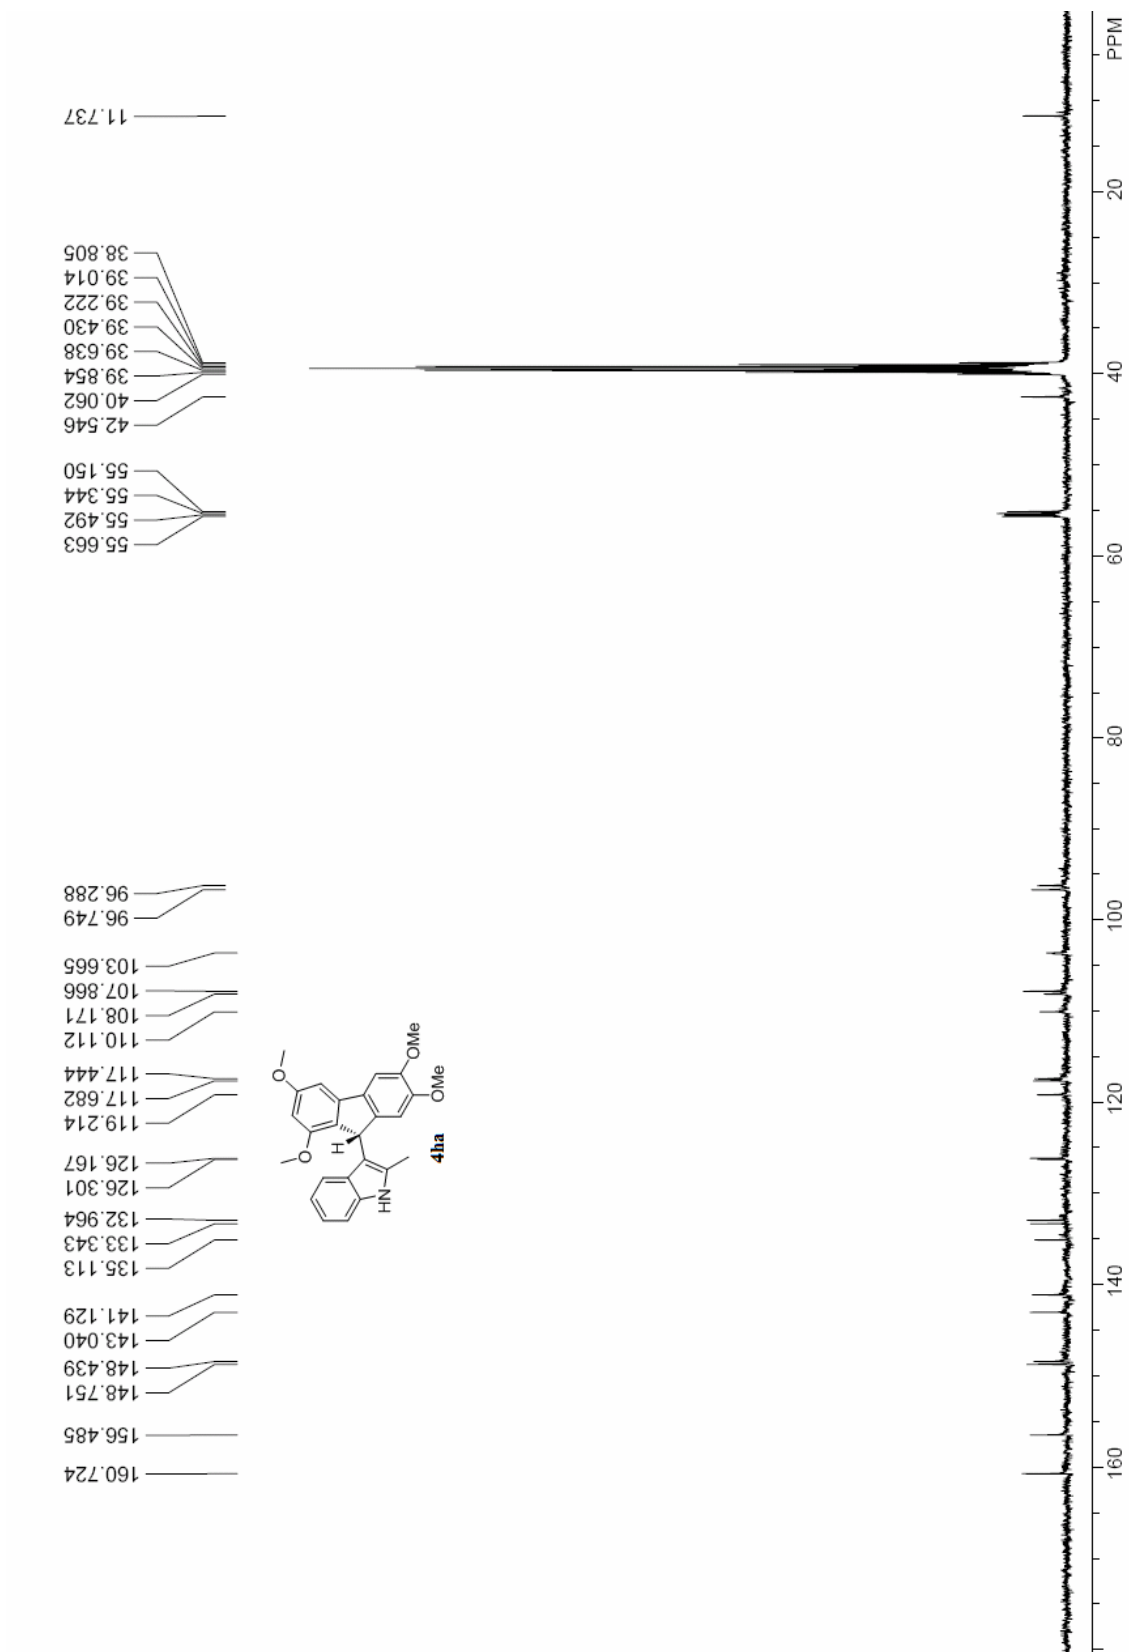

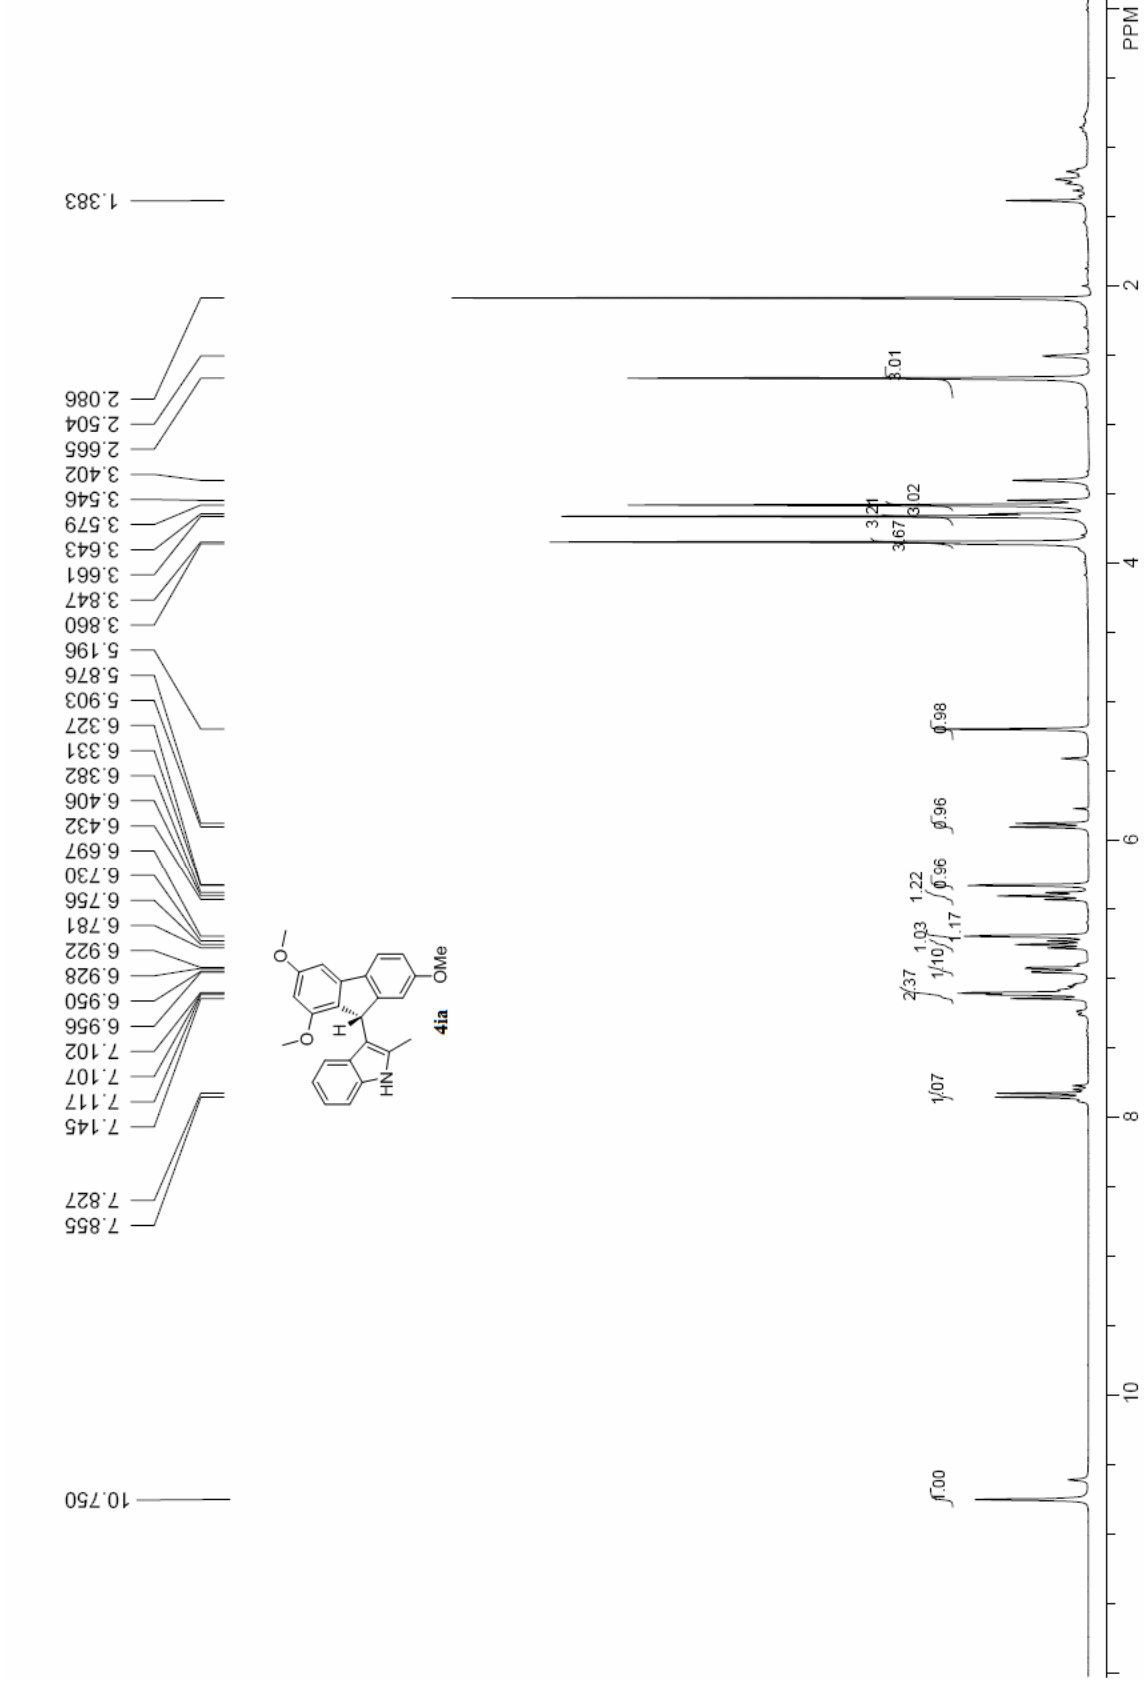

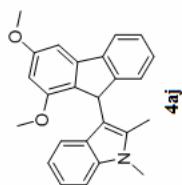

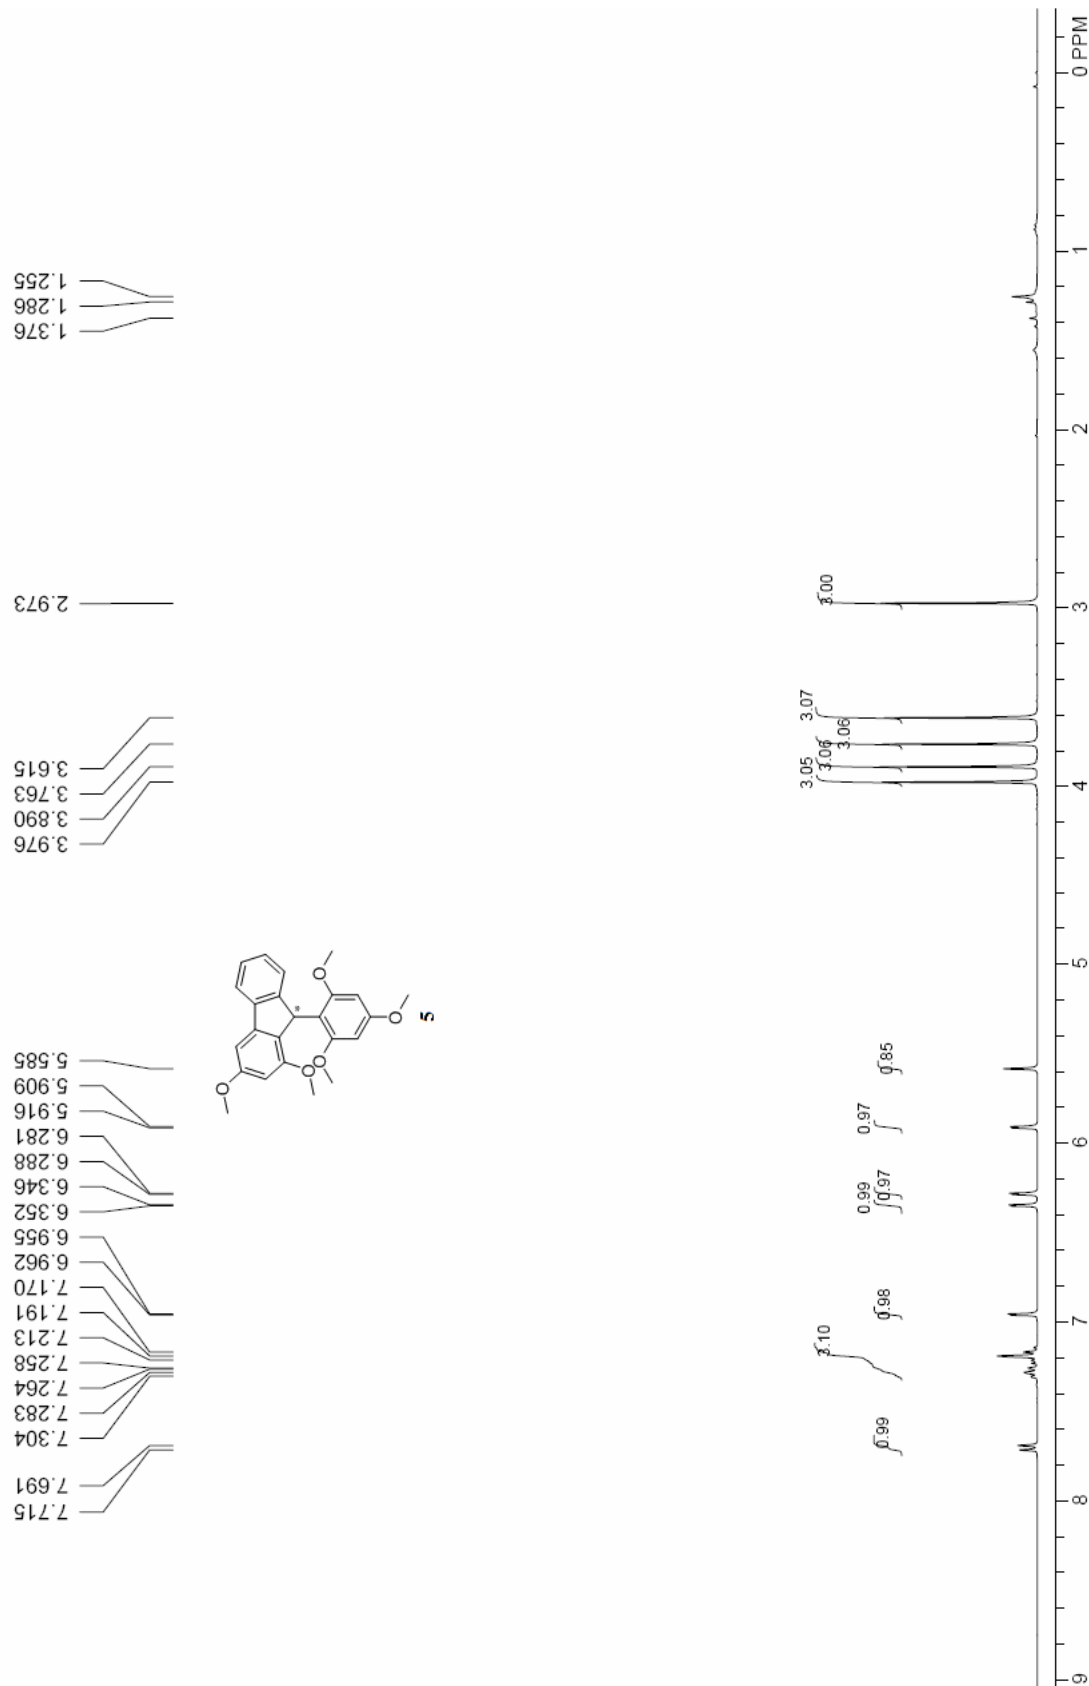



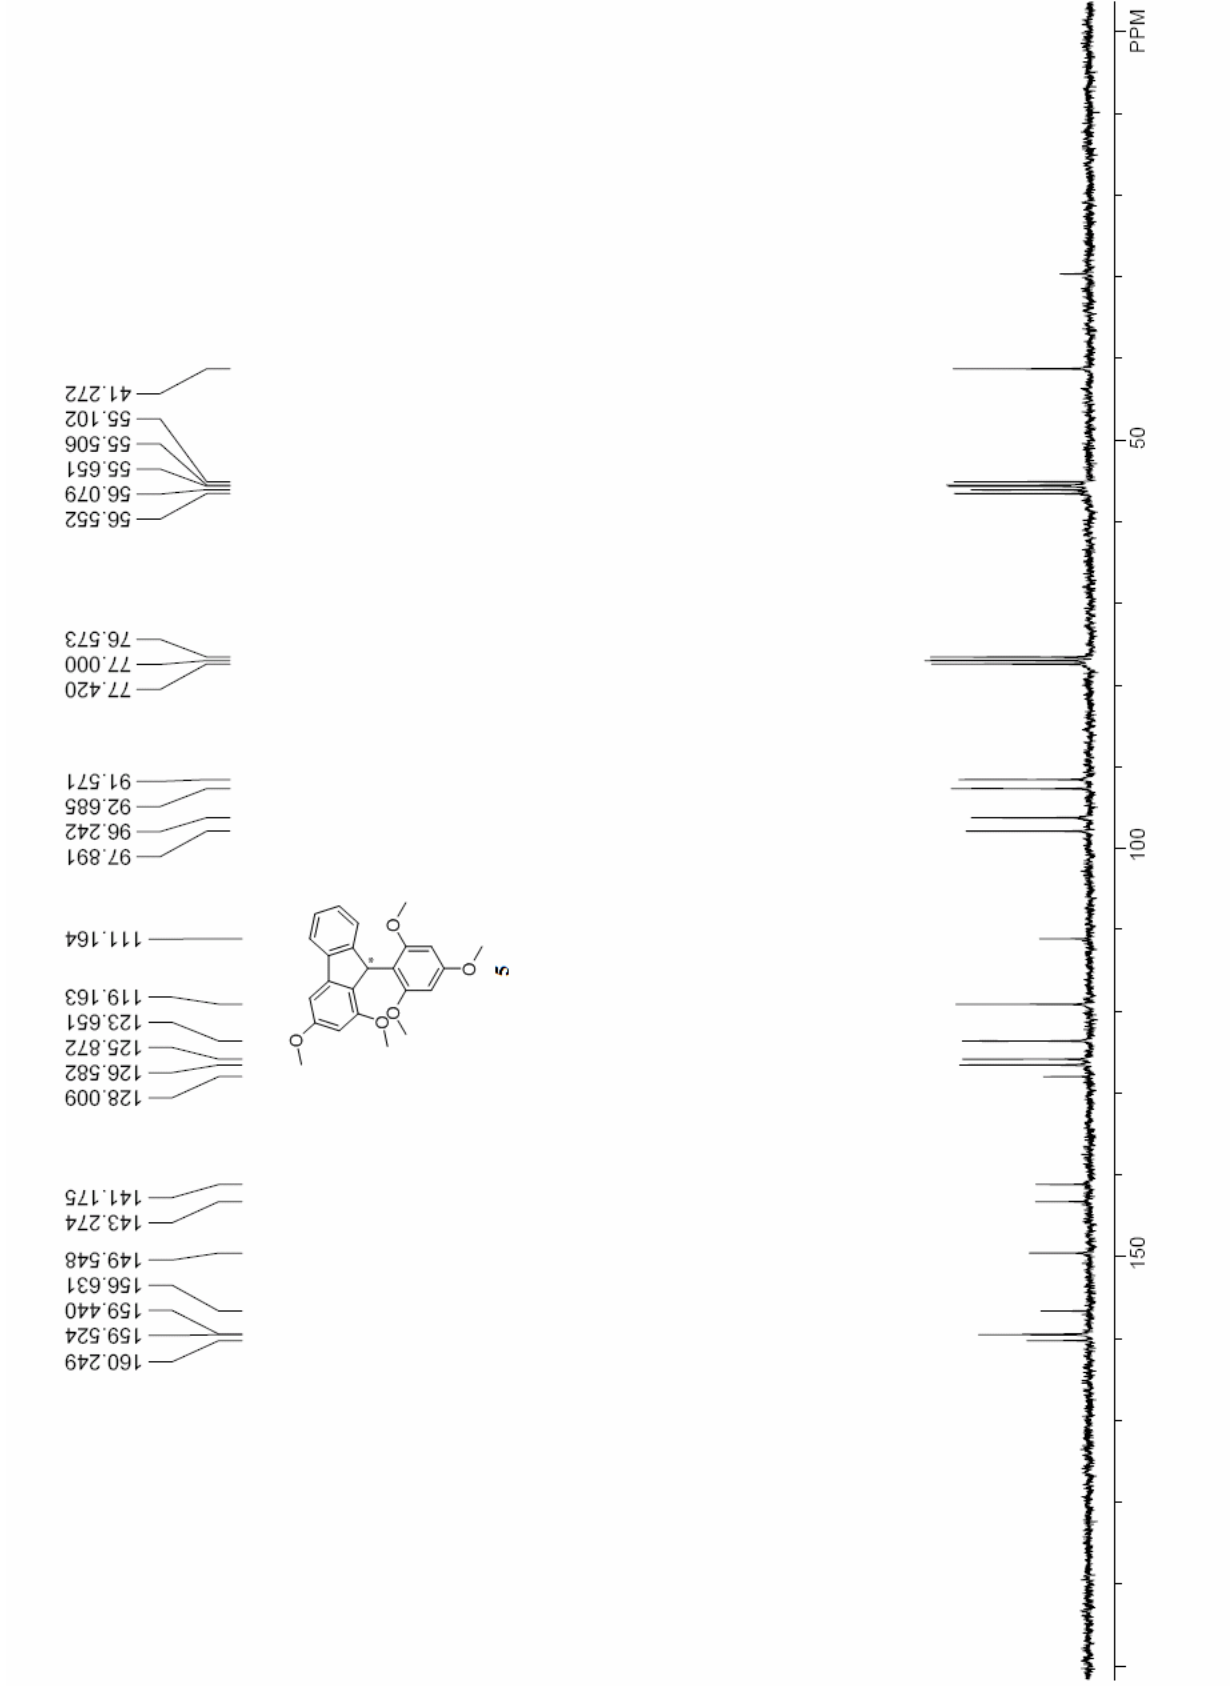

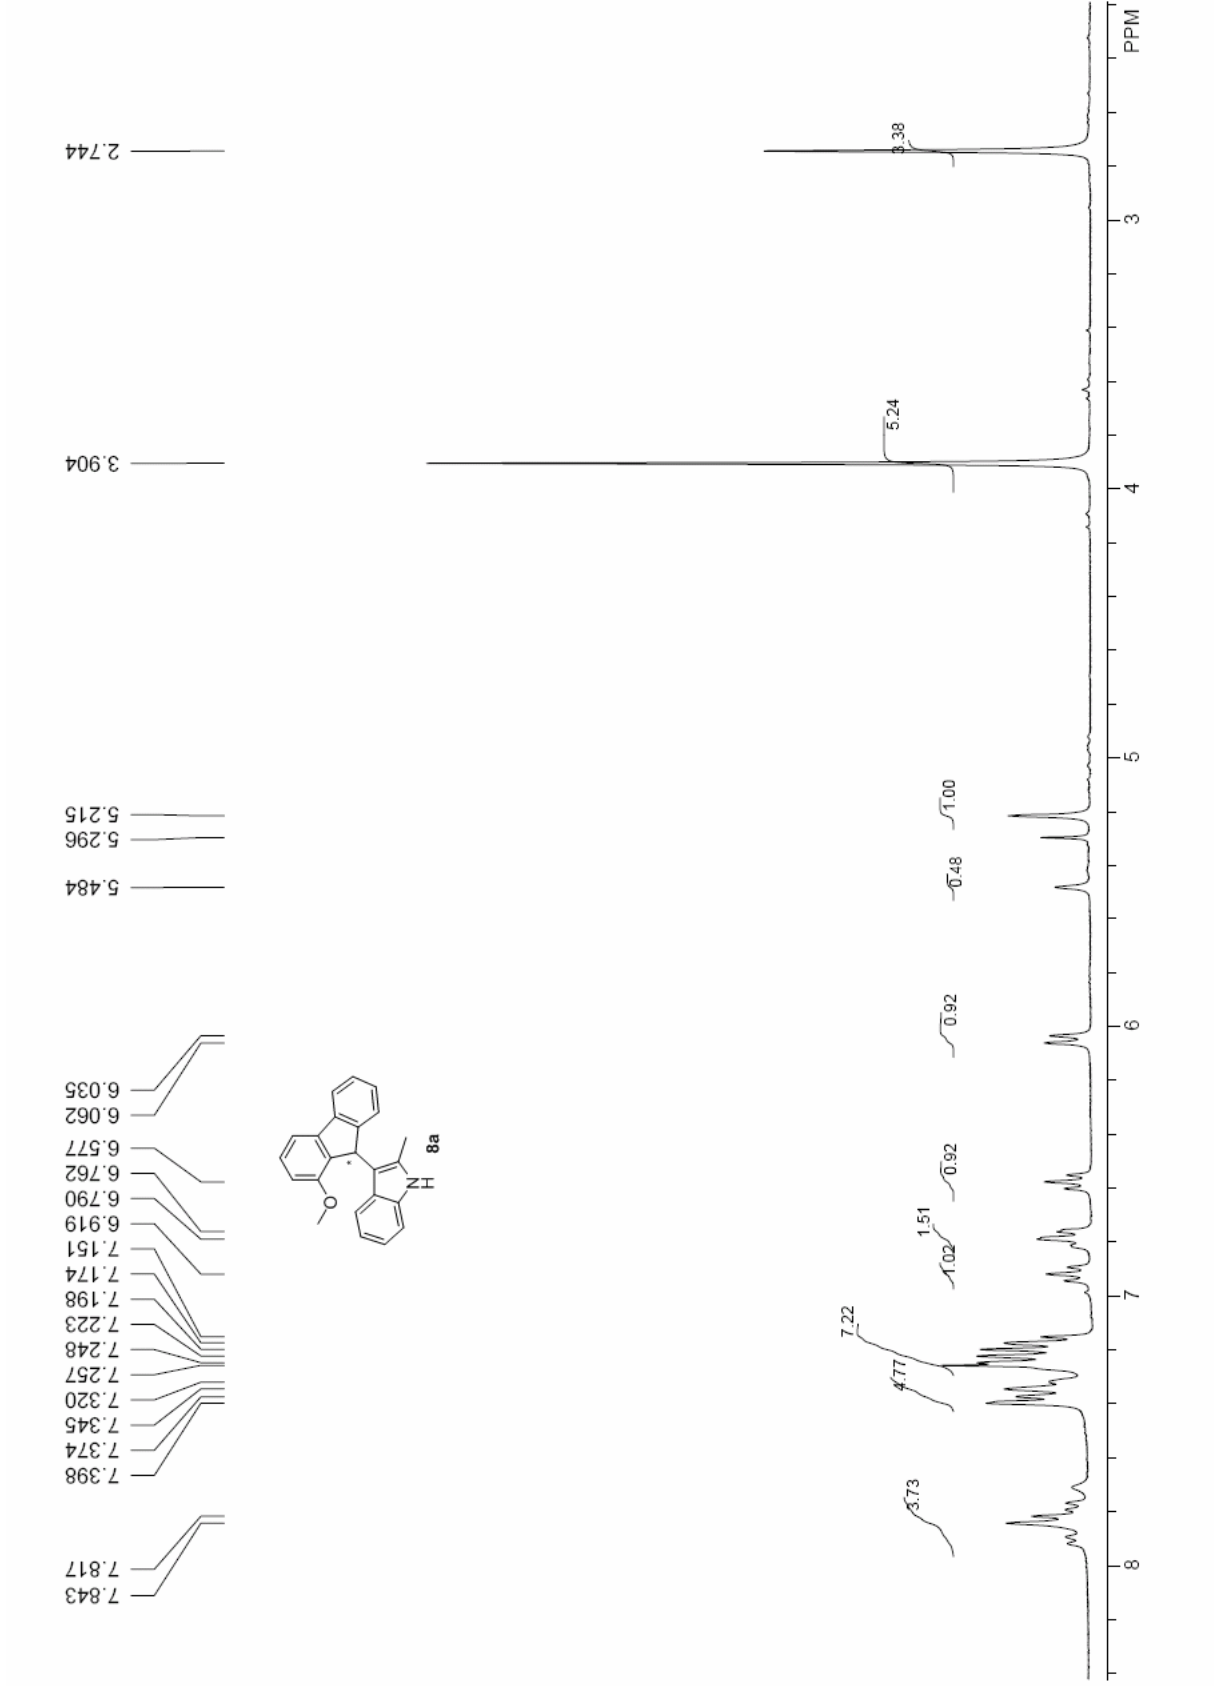

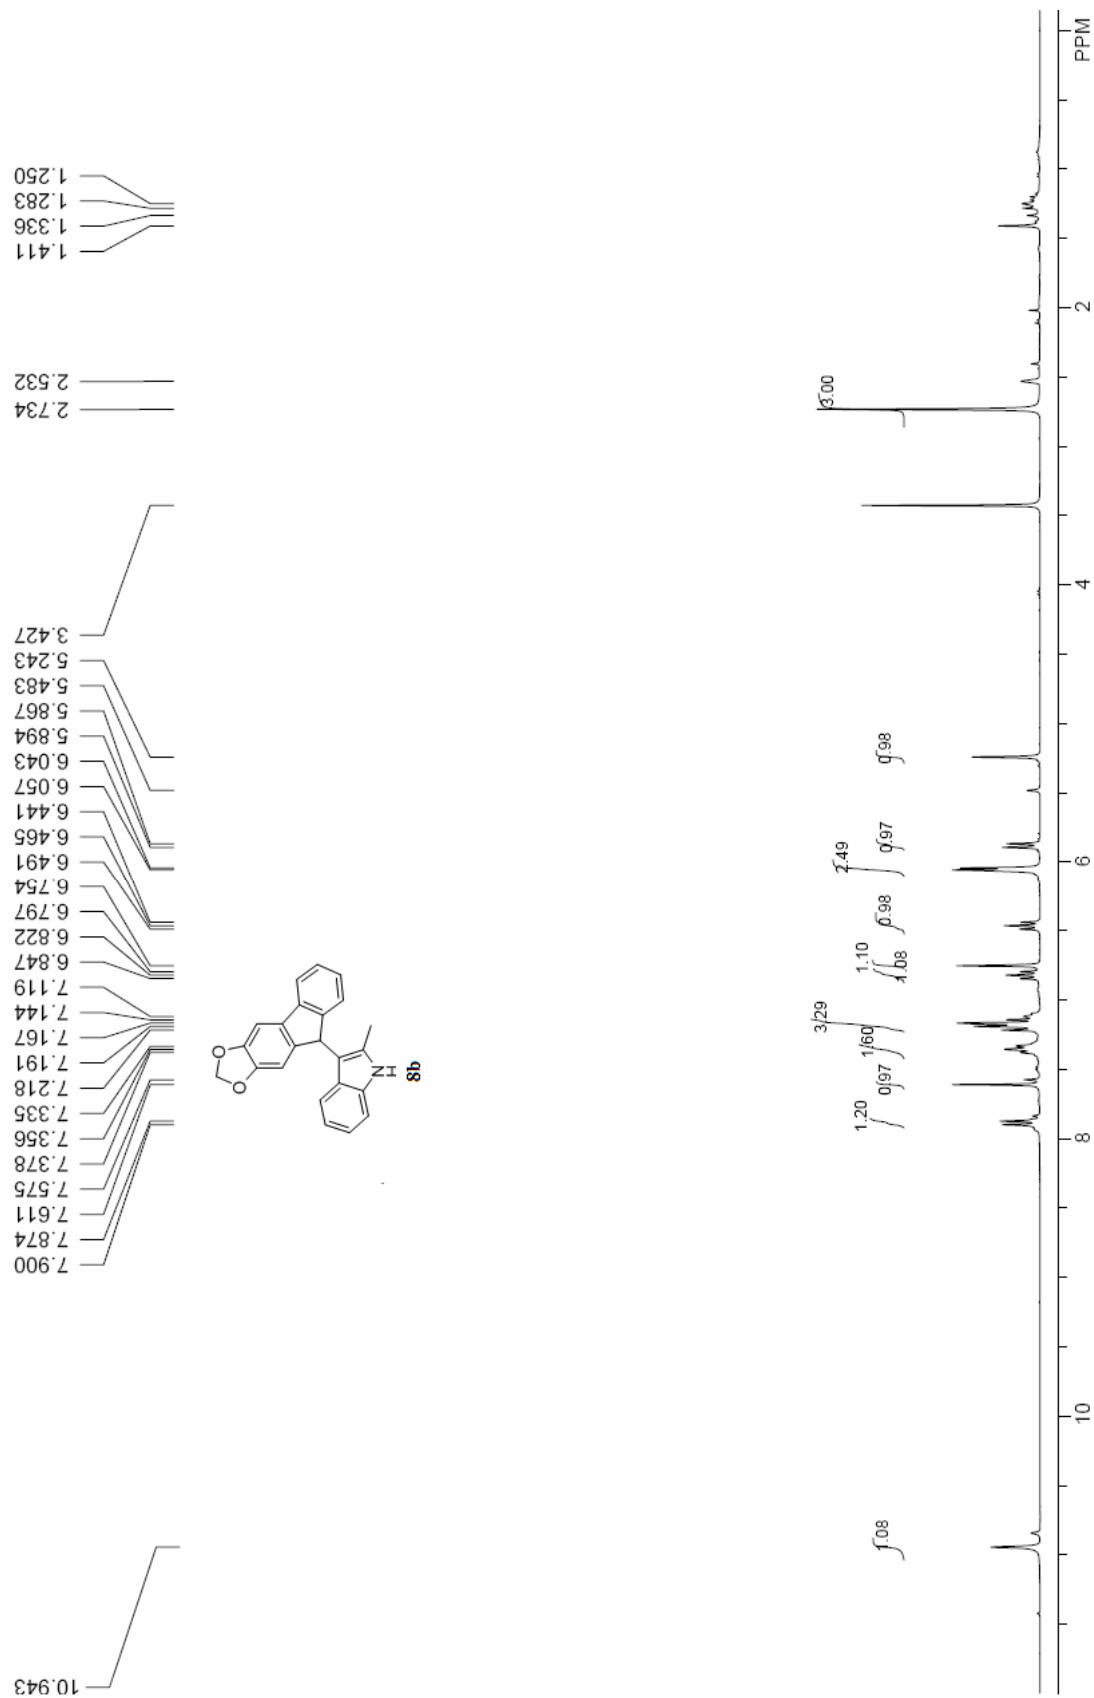

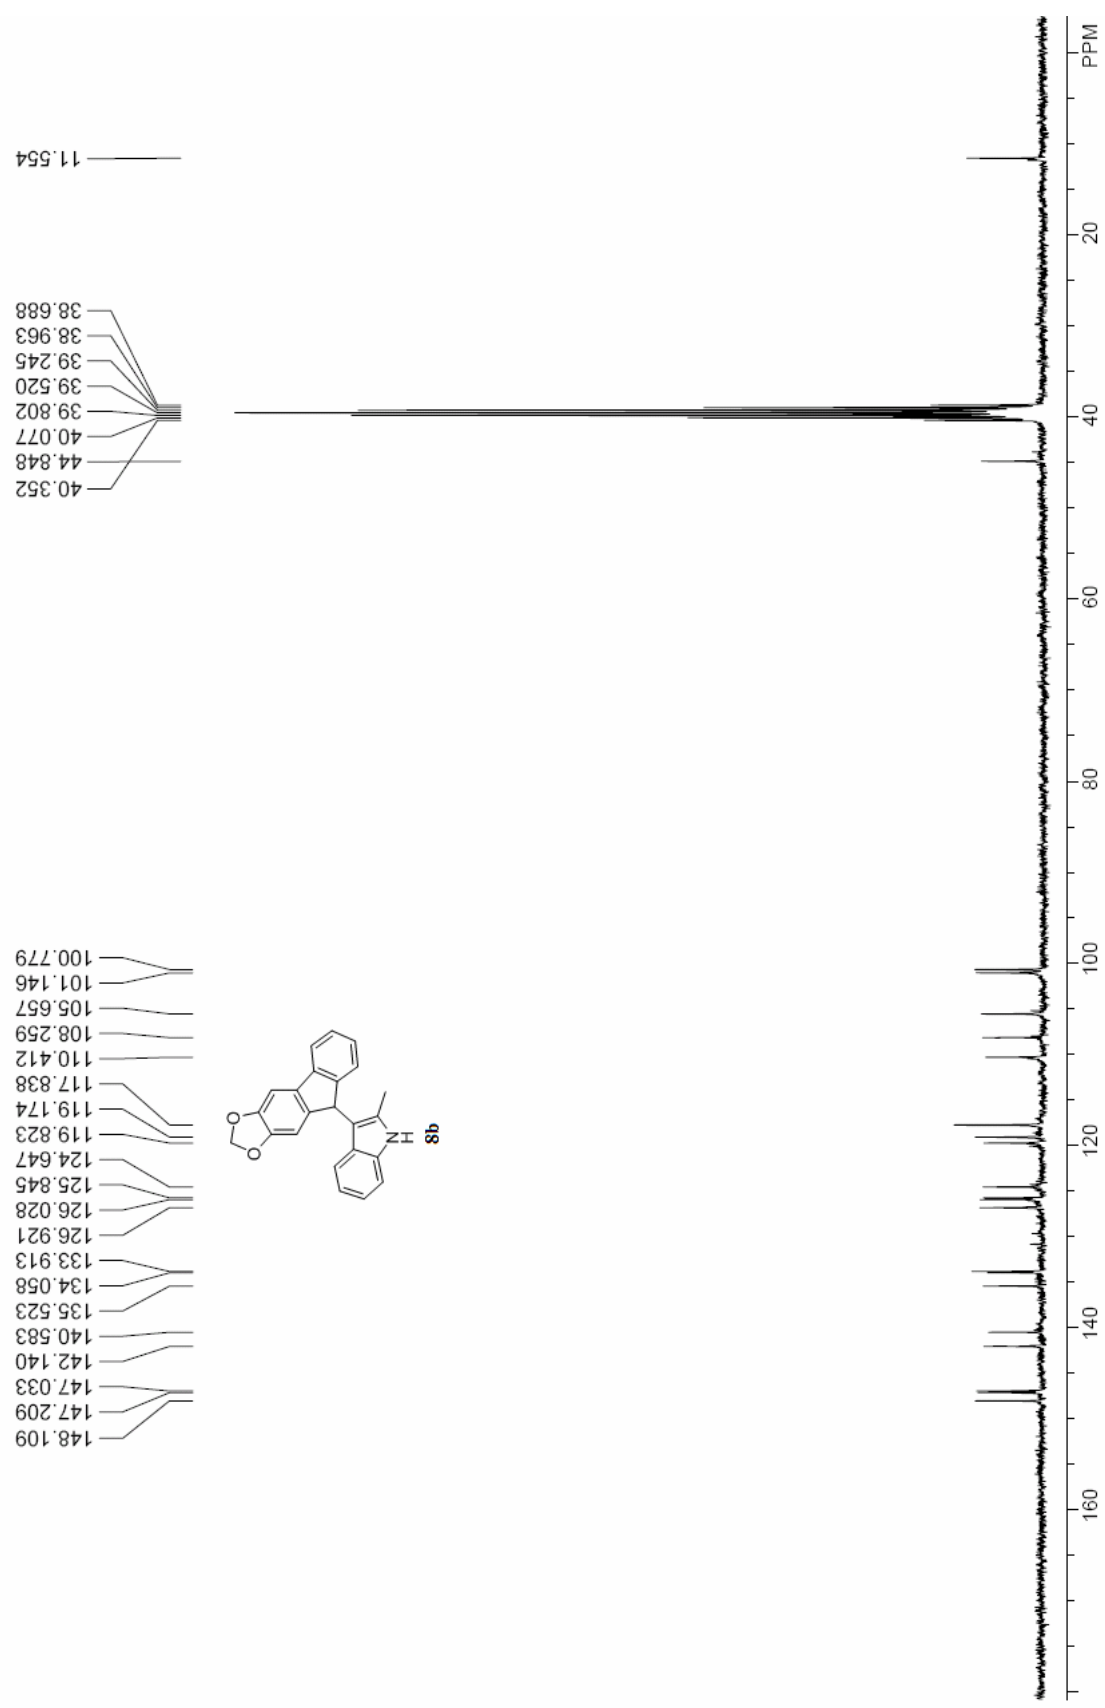

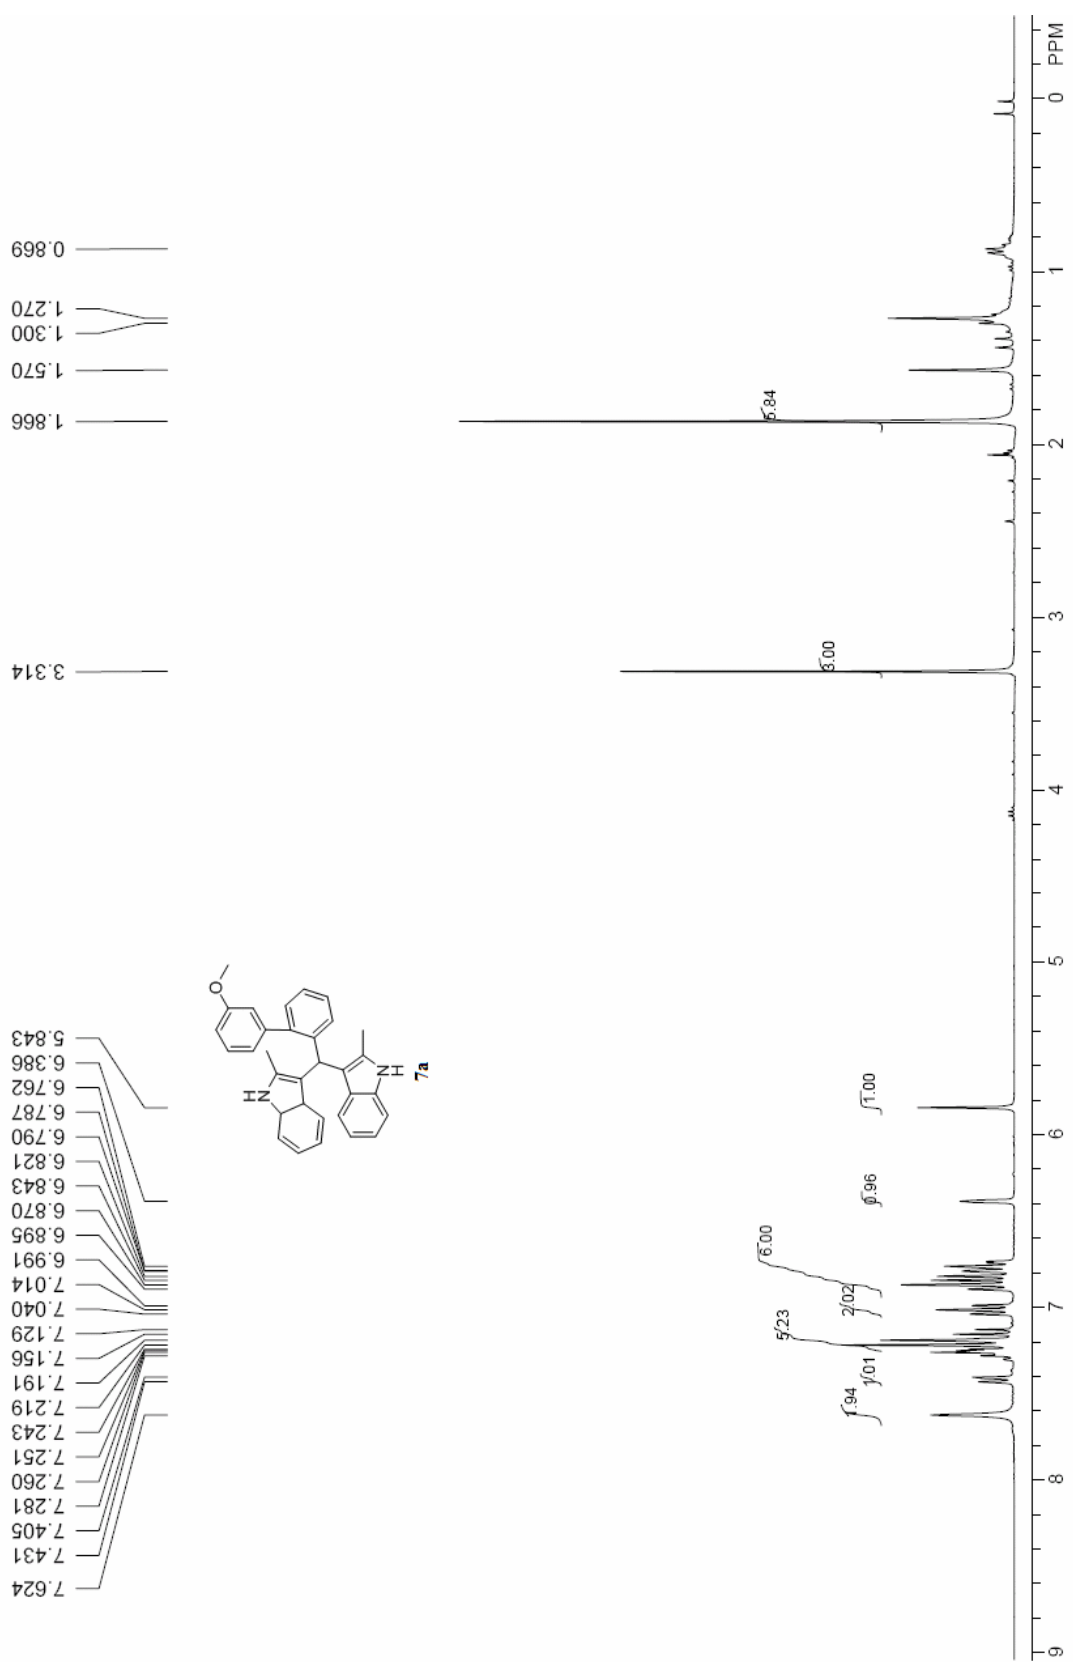

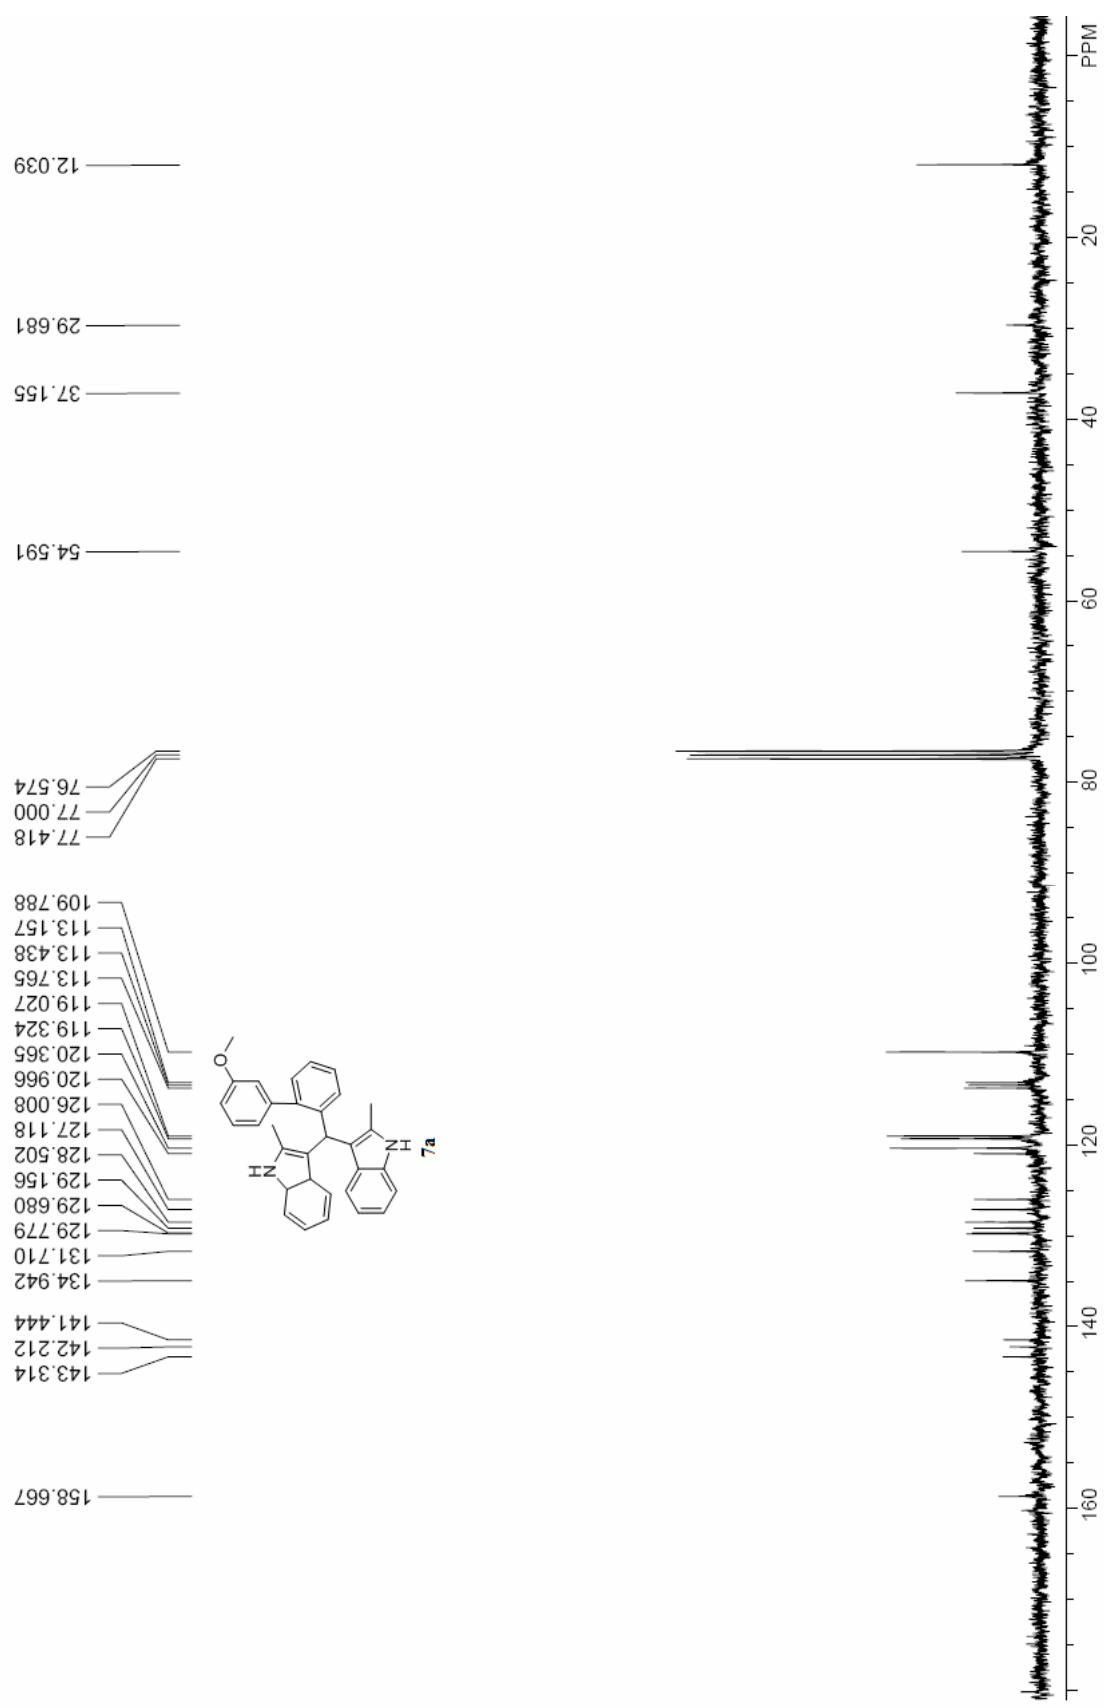

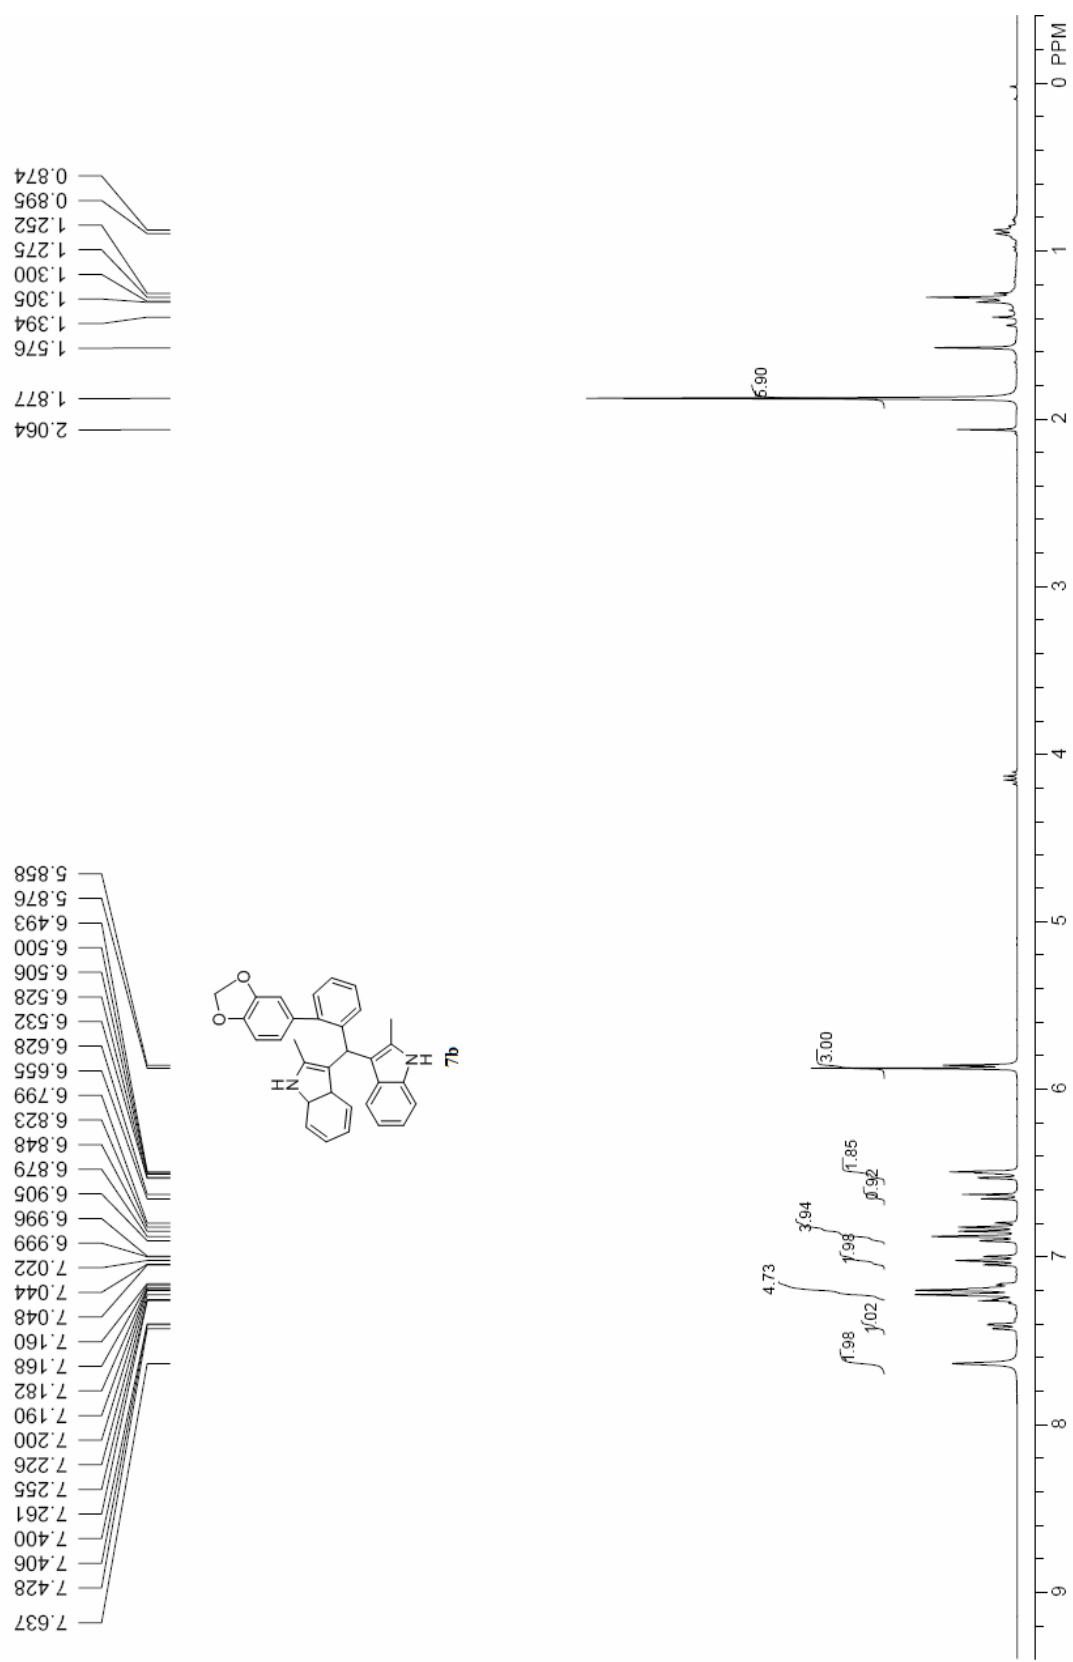

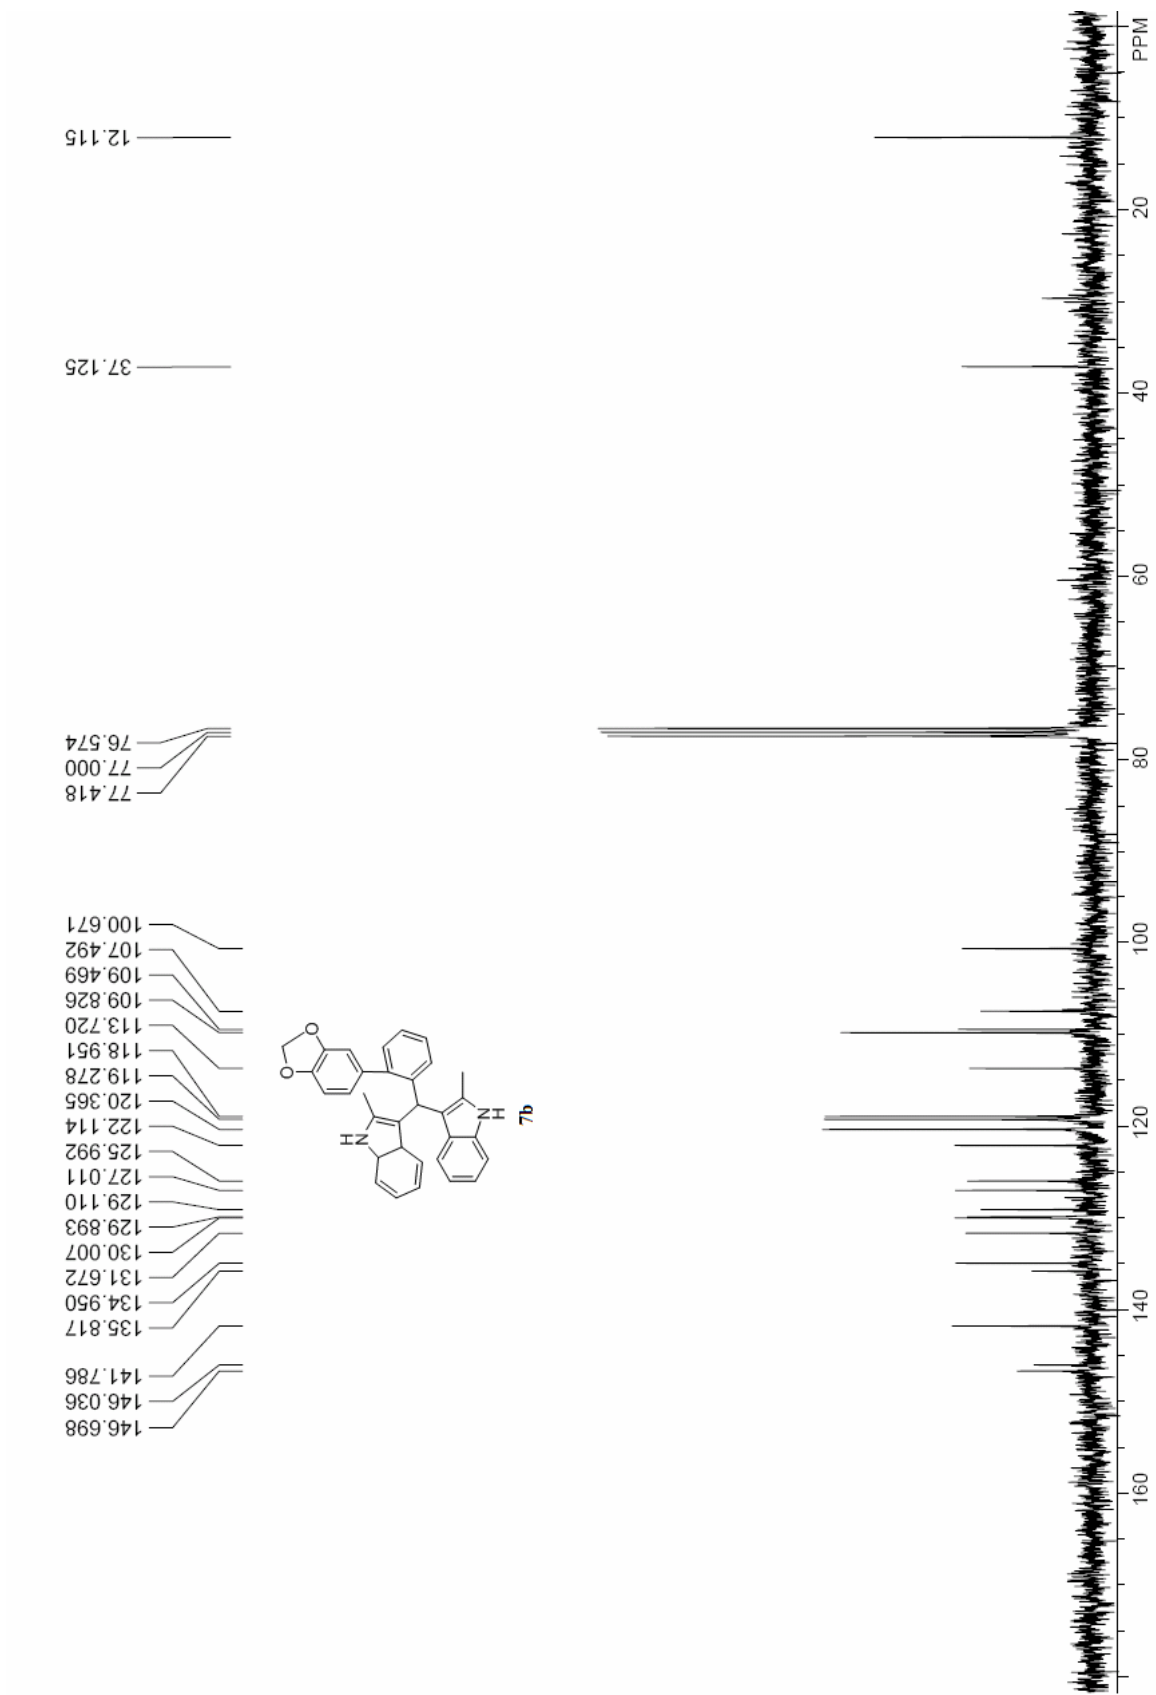



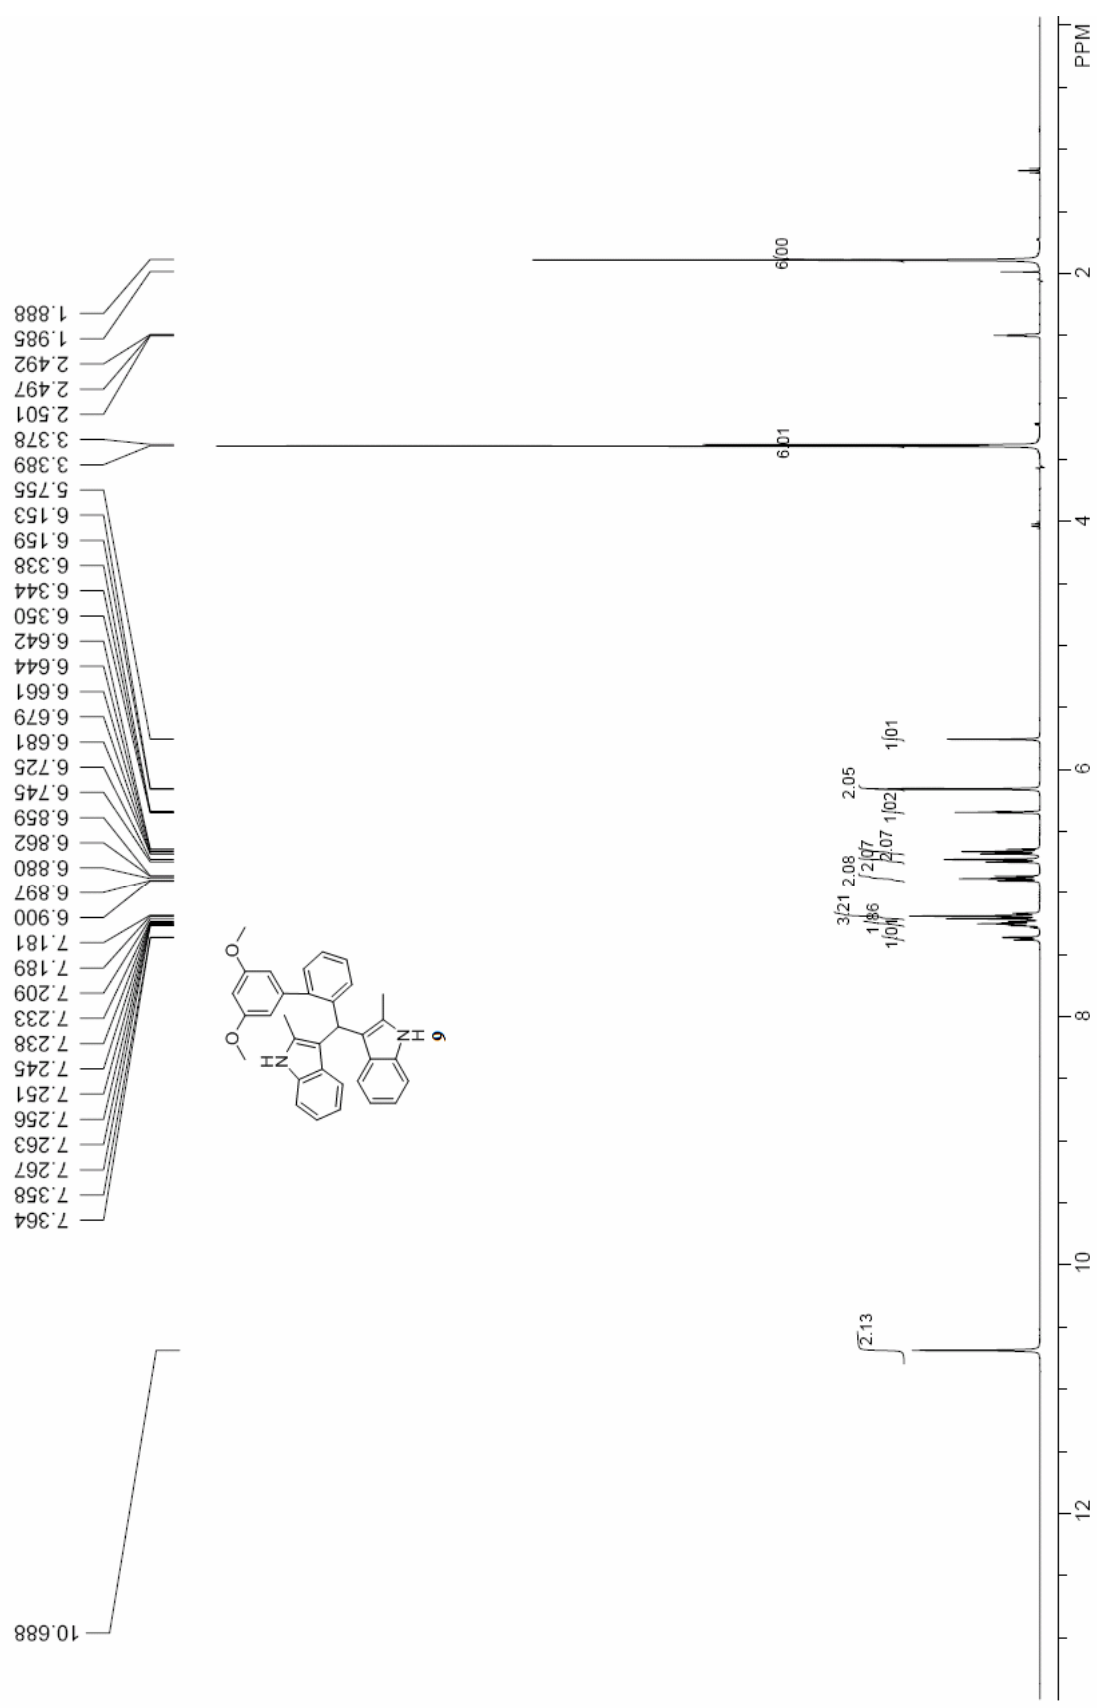

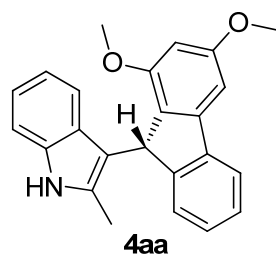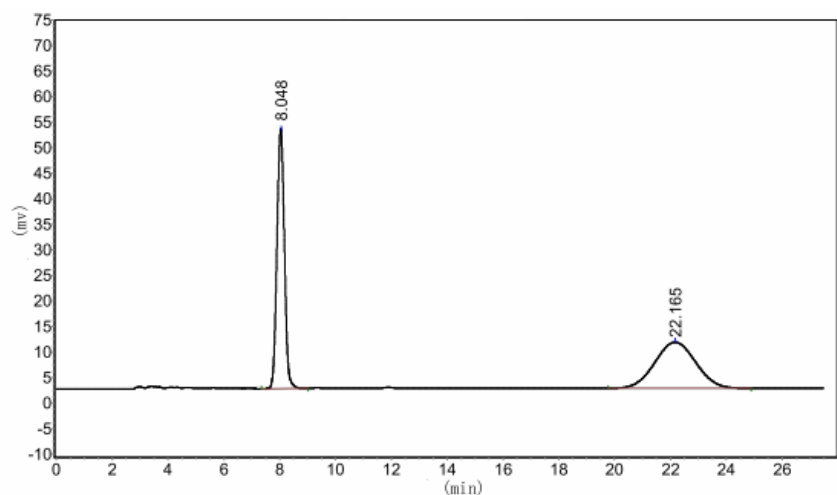

| No.   | ID.Name | R. Time | PeakHeight | PeakArea    | PerCent  |
|-------|---------|---------|------------|-------------|----------|
| 1     |         | 8.048   | 50806.668  | 940088.500  | 50.1239  |
| 2     |         | 22.165  | 9060.104   | 935441.625  | 49.8761  |
| Total |         |         | 59866.772  | 1875530.125 | 100.0000 |

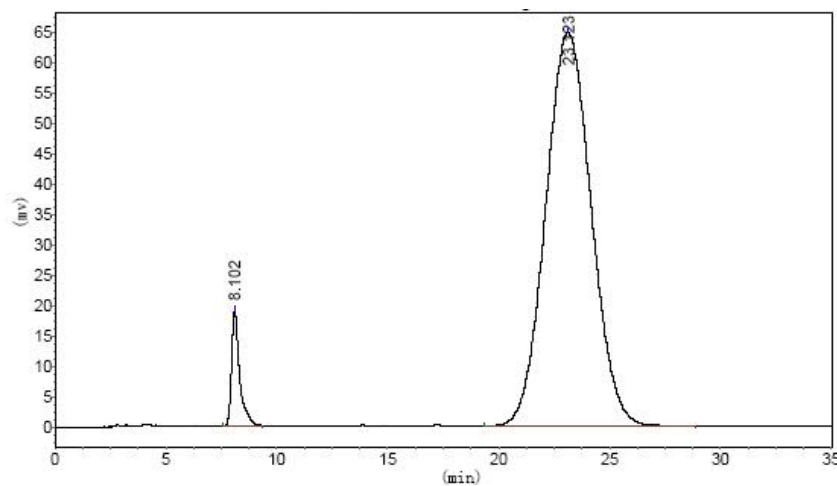

| No.   | ID.Name | R. Time | PeakHeight | PeakArea    | PerCent  |
|-------|---------|---------|------------|-------------|----------|
| 1     |         | 8.102   | 18899.072  | 472258.344  | 4.8818   |
| 2     |         | 23.123  | 64579.418  | 9201620.000 | 95.1182  |
| Total |         |         | 83478.490  | 9673878.344 | 100.0000 |

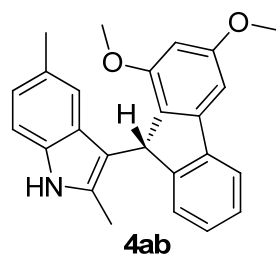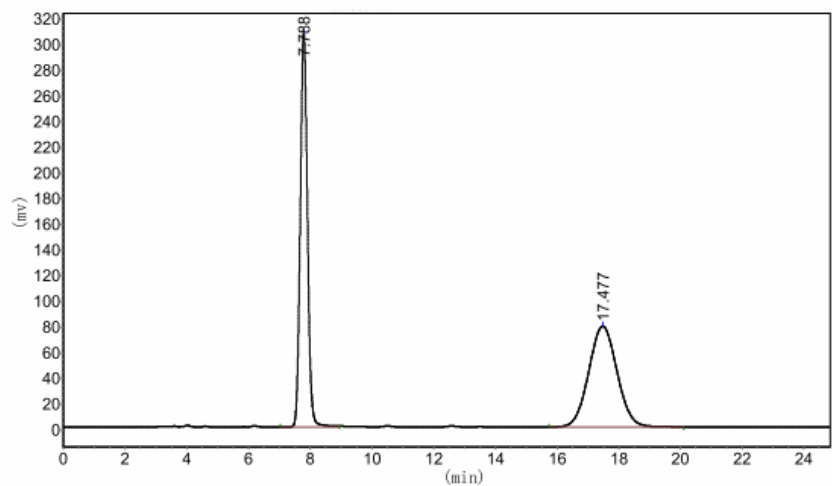

| NO.   | ID.Name | R. Time | PeakHeight | PeakArea    | PerCent  |
|-------|---------|---------|------------|-------------|----------|
| 1     |         | 7.788   | 306870.344 | 4970768.000 | 49.9328  |
| 2     |         | 17.477  | 78370.195  | 4984152.500 | 50.0672  |
| Total |         |         | 385240.539 | 9954920.500 | 100.0000 |

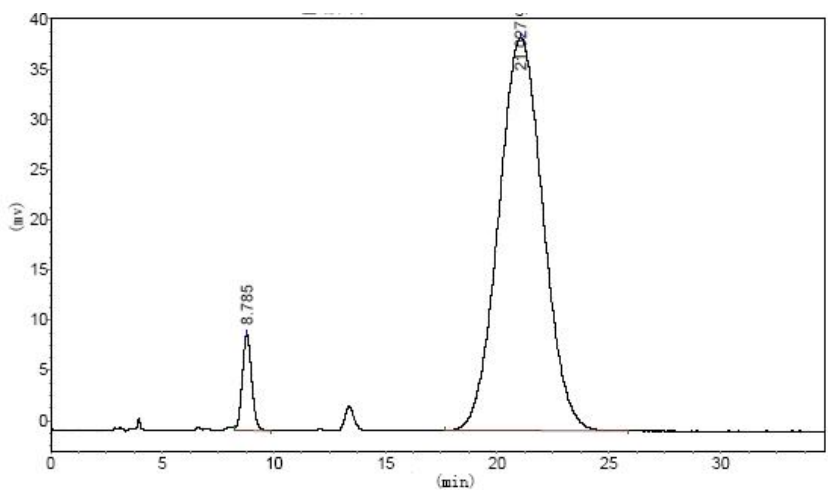

| No.   | ID.Name | R. Time | PeakHeight | PeakArea    | PerCent  |
|-------|---------|---------|------------|-------------|----------|
| 1     |         | 8.785   | 9579.979   | 281239.406  | 4.9388   |
| 2     |         | 21.027  | 39118.141  | 5413224.000 | 95.0612  |
| Total |         |         | 48698.120  | 5694463.406 | 100.0000 |

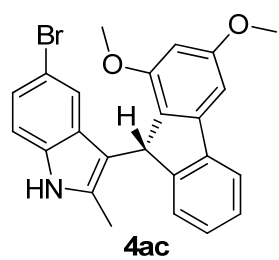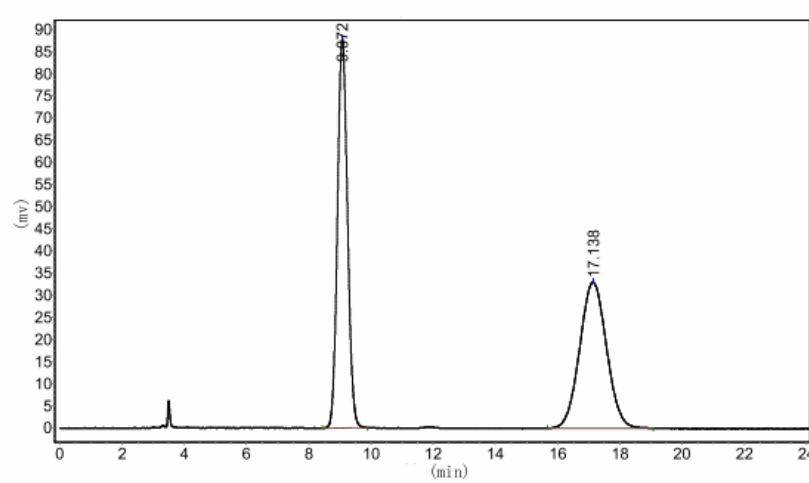

| NO.   | ID.Name | R. Time | PeakHeight  | PeakArea     | PerCent   |
|-------|---------|---------|-------------|--------------|-----------|
| 1     |         | 9. 072  | 87854. 445  | 1965966. 875 | 49. 8035  |
| 2     |         | 17. 138 | 32996. 551  | 1981480. 750 | 50. 1965  |
| Total |         |         | 120850. 996 | 3947447. 625 | 100. 0000 |

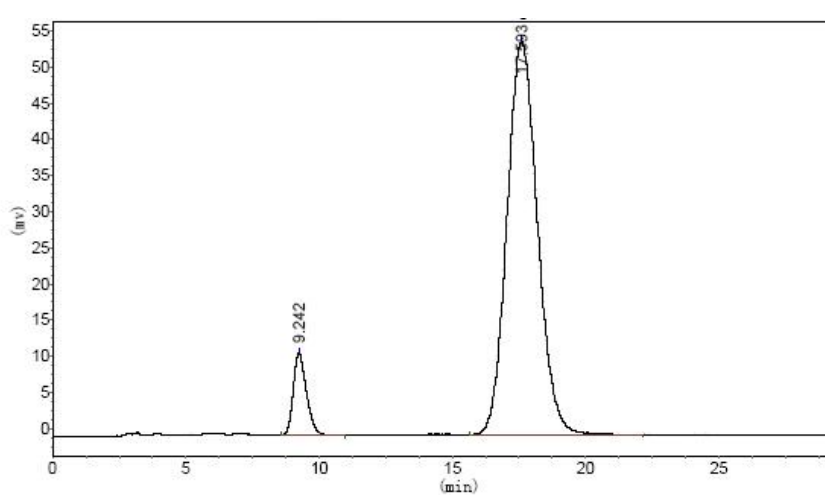

| No.   | ID.Name | R. Time | PeakHeight | PeakArea     | PerCent   |
|-------|---------|---------|------------|--------------|-----------|
| 1     |         | 9. 242  | 11341. 472 | 388973. 750  | 8. 2531   |
| 2     |         | 17. 593 | 54421. 656 | 4324103. 000 | 91. 7469  |
| Total |         |         | 65763. 128 | 4713076. 750 | 100. 0000 |

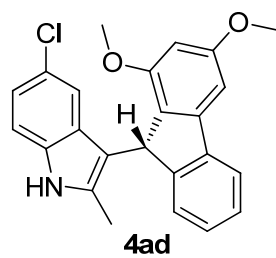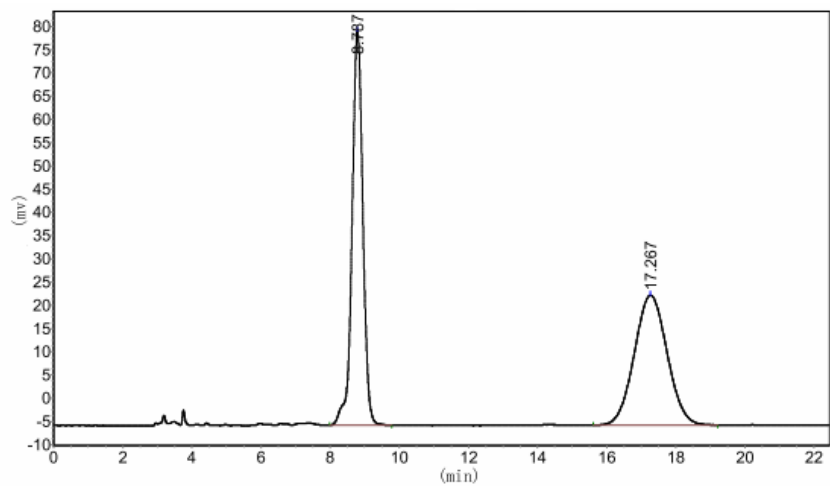

| NO.   | ID.Name | R. Time | PeakHeight | PeakArea    | PerCent  |
|-------|---------|---------|------------|-------------|----------|
| 1     |         | 8.787   | 84799.680  | 1847126.500 | 50.0398  |
| 2     |         | 17.267  | 27914.912  | 1844185.375 | 49.9602  |
| Total |         |         | 112714.592 | 3691311.875 | 100.0000 |

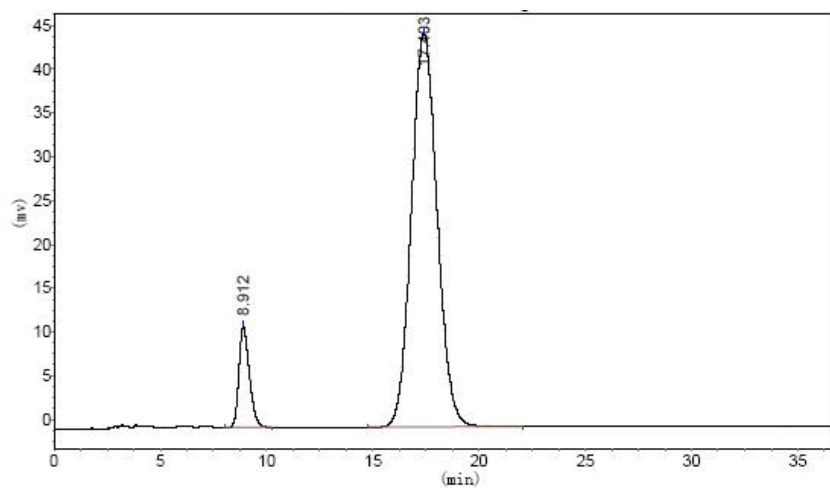

| No.   | ID.Name | R. Time | PeakHeight | PeakArea    | PerCent  |
|-------|---------|---------|------------|-------------|----------|
| 1     |         | 8.912   | 11602.447  | 395081.063  | 9.4244   |
| 2     |         | 17.403  | 44948.227  | 3797026.000 | 90.5756  |
| Total |         |         | 56550.674  | 4192107.063 | 100.0000 |

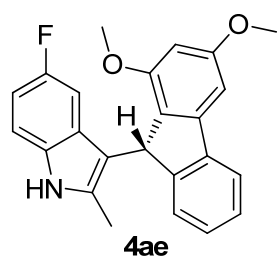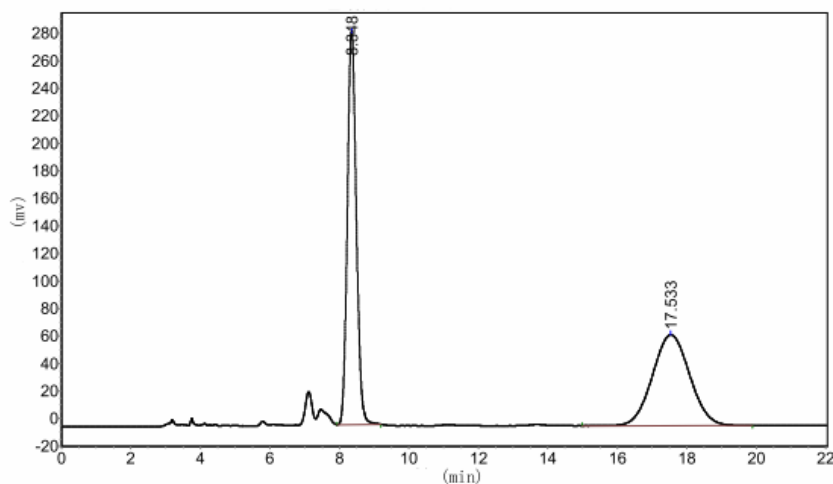

| NO.   | ID.Name | R. Time | PeakHeight | PeakArea     | PerCent  |
|-------|---------|---------|------------|--------------|----------|
| 1     |         | 8.348   | 284929.031 | 5112401.000  | 50.9081  |
| 2     |         | 17.533  | 65987.531  | 4930011.000  | 49.0919  |
| Total |         |         | 350916.563 | 10042412.000 | 100.0000 |

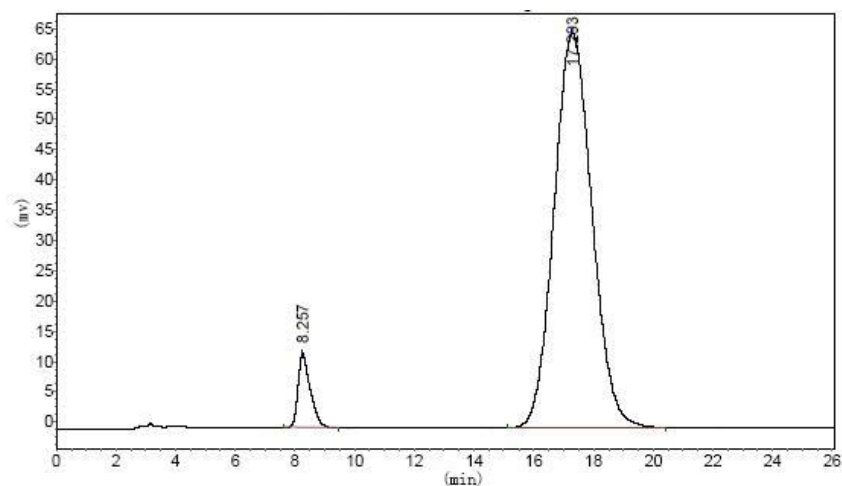

| No.   | ID.Name | R. Time | PeakHeight | PeakArea    | PerCent  |
|-------|---------|---------|------------|-------------|----------|
| 1     |         | 8.257   | 12206.007  | 346881.000  | 5.6804   |
| 2     |         | 17.293  | 65112.914  | 5759719.000 | 94.3196  |
| Total |         |         | 77318.921  | 6106600.000 | 100.0000 |

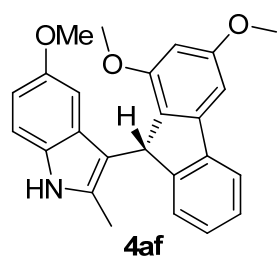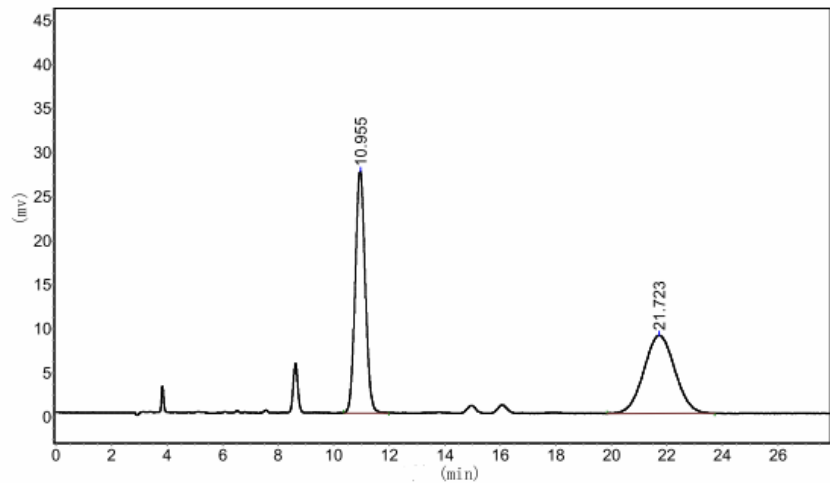

| NO.   | ID.Name | R. Time | PeakHeight | PeakArea    | PerCent  |
|-------|---------|---------|------------|-------------|----------|
| 1     |         | 10.955  | 27401.115  | 686425.125  | 49.9065  |
| 2     |         | 21.723  | 8864.035   | 688998.063  | 50.0935  |
| Total |         |         | 36265.150  | 1375423.188 | 100.0000 |

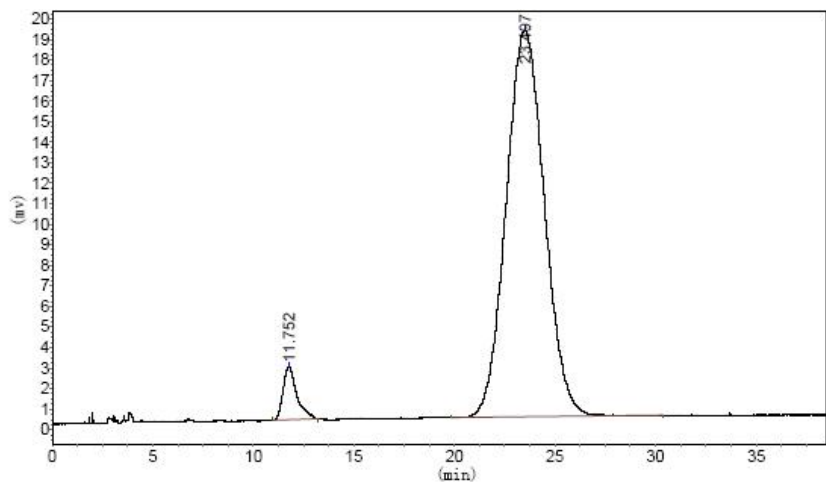

| No.   | ID.Name | R. Time | PeakHeight | PeakArea    | PerCent  |
|-------|---------|---------|------------|-------------|----------|
| 1     |         | 11.752  | 2601.250   | 123739.500  | 4.7128   |
| 2     |         | 23.497  | 18797.133  | 2501844.750 | 95.2872  |
| Total |         |         | 21398.383  | 2625584.250 | 100.0000 |

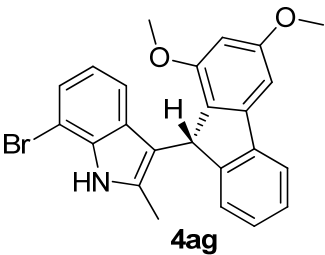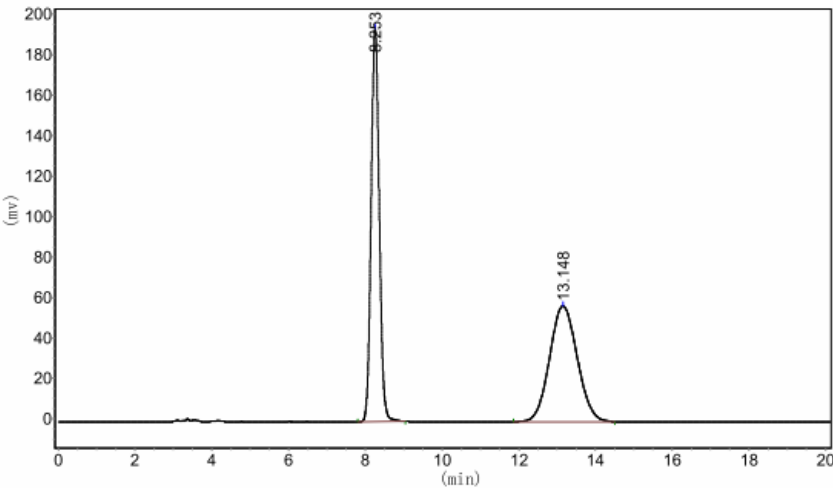

| NO.   | ID.Name | R. Time | PeakHeight | PeakArea    | PerCent  |
|-------|---------|---------|------------|-------------|----------|
| 1     |         | 8.253   | 194272.625 | 2869642.500 | 50.0162  |
| 2     |         | 13.148  | 57226.473  | 2867778.000 | 49.9838  |
| Total |         |         | 251499.098 | 5737420.500 | 100.0000 |

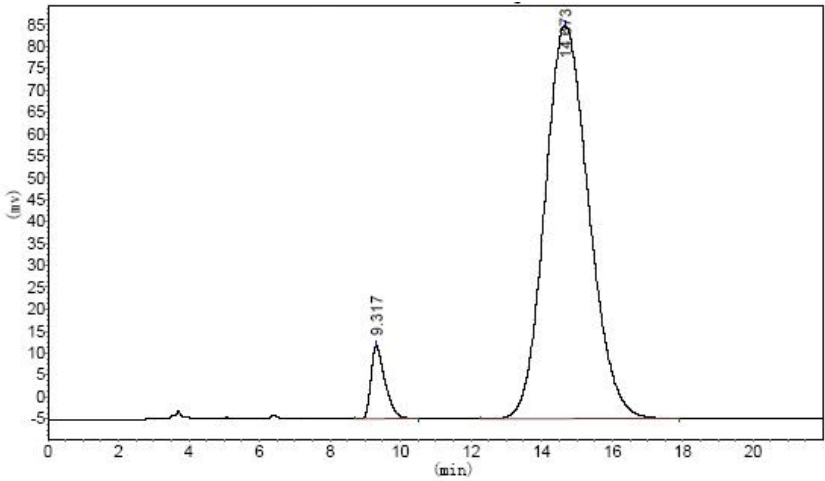

| No.   | ID.Name | R. Time | PeakHeight | PeakArea    | PerCent  |
|-------|---------|---------|------------|-------------|----------|
| 1     |         | 9.317   | 16707.434  | 460256.313  | 5.6052   |
| 2     |         | 14.673  | 89727.656  | 7750979.000 | 94.3948  |
| Total |         |         | 106435.090 | 8211235.313 | 100.0000 |



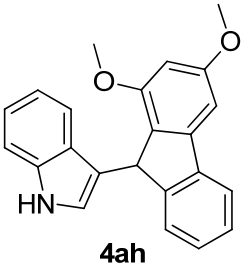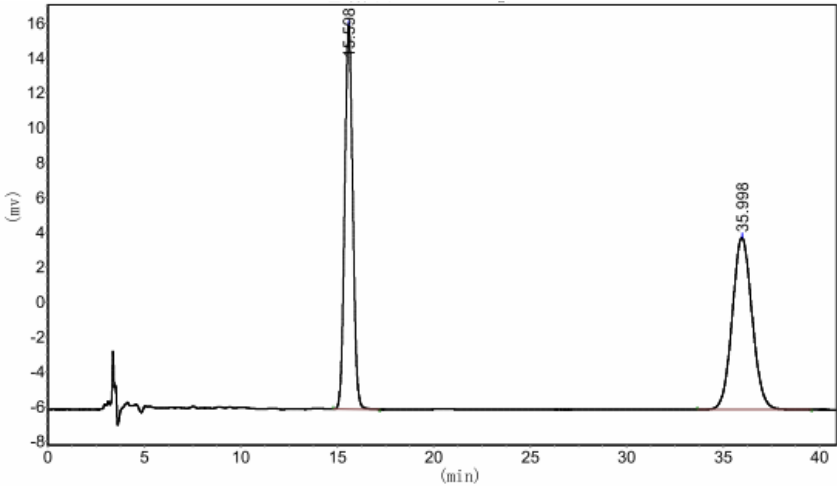

| No.   | ID.Name | R. Time | PeakHeight | PeakArea    | PerCent  |
|-------|---------|---------|------------|-------------|----------|
| 1     |         | 15.598  | 21987.166  | 639956.563  | 47.4133  |
| 2     |         | 35.998  | 9875.573   | 709784.875  | 52.5867  |
| Total |         |         | 31862.739  | 1349741.438 | 100.0000 |

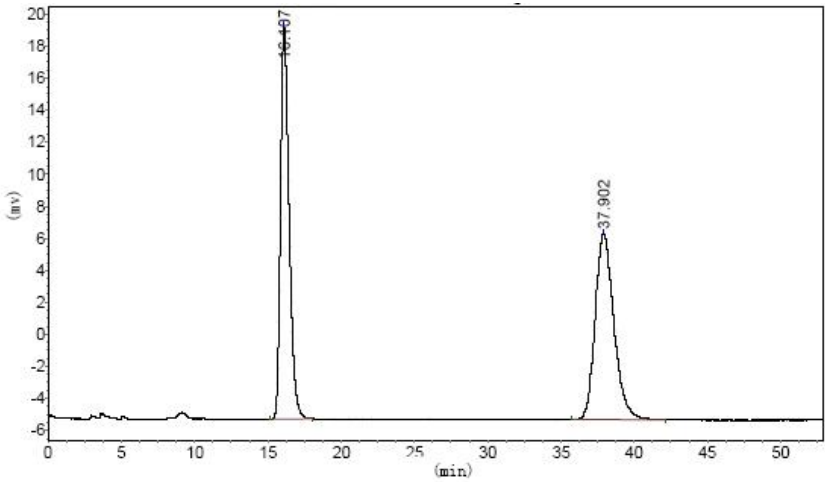

| No.   | ID.Name | R. Time | PeakHeight | PeakArea    | PerCent  |
|-------|---------|---------|------------|-------------|----------|
| 1     |         | 16.107  | 24522.865  | 1000110.750 | 49.1391  |
| 2     |         | 37.902  | 11626.085  | 1035152.125 | 50.8609  |
| Total |         |         | 36148.950  | 2035262.875 | 100.0000 |

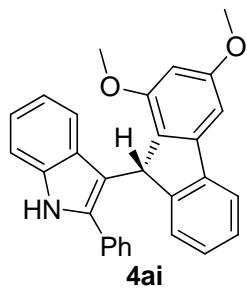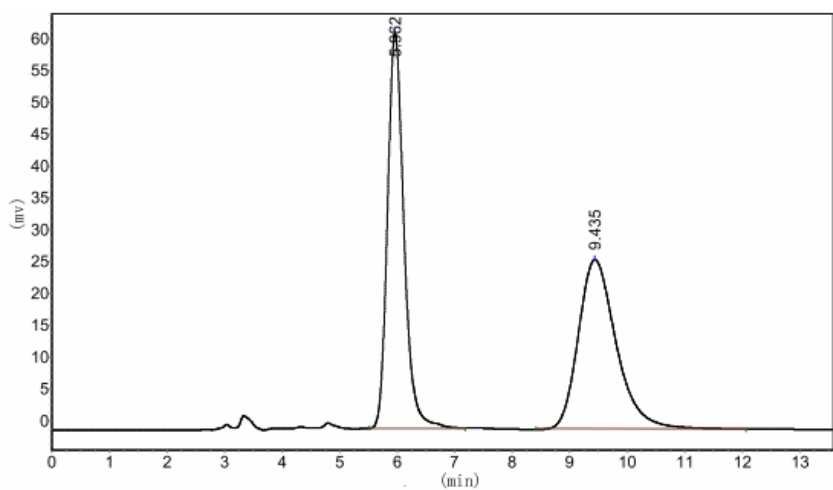

| No.   | ID.Name | R. Time | PeakHeight | PeakArea    | PerCent  |
|-------|---------|---------|------------|-------------|----------|
| 1     |         | 5.962   | 62018.359  | 1234337.625 | 50.4973  |
| 2     |         | 9.435   | 26544.973  | 1210027.250 | 49.5027  |
| Total |         |         | 88563.332  | 2444364.875 | 100.0000 |

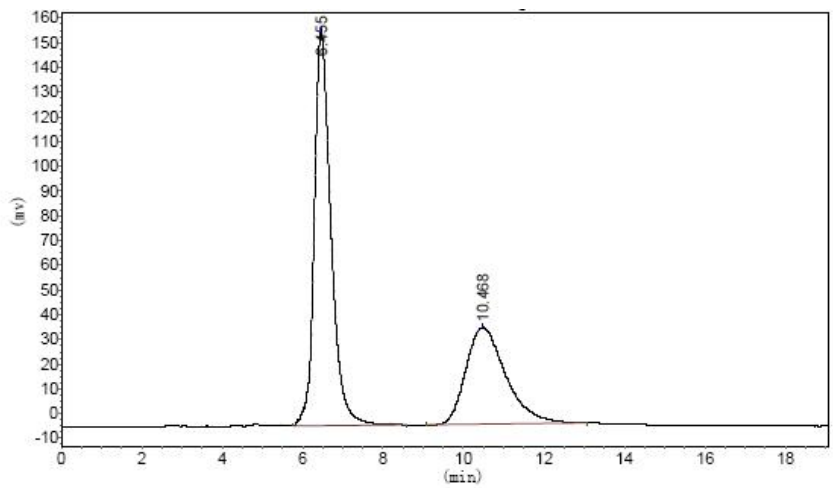

| No. | ID.Name | R. Time | PeakHeight | PeakArea    | PerCent  |
|-----|---------|---------|------------|-------------|----------|
| 1   |         | 6.455   | 159001.625 | 4680786.500 | 63.4030  |
| 2   |         | 10.468  | 39170.934  | 2701811.750 | 36.5970  |
|     |         |         | 198172.559 | 7382598.250 | 100.0000 |

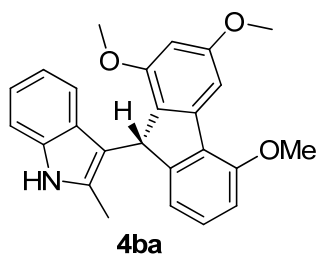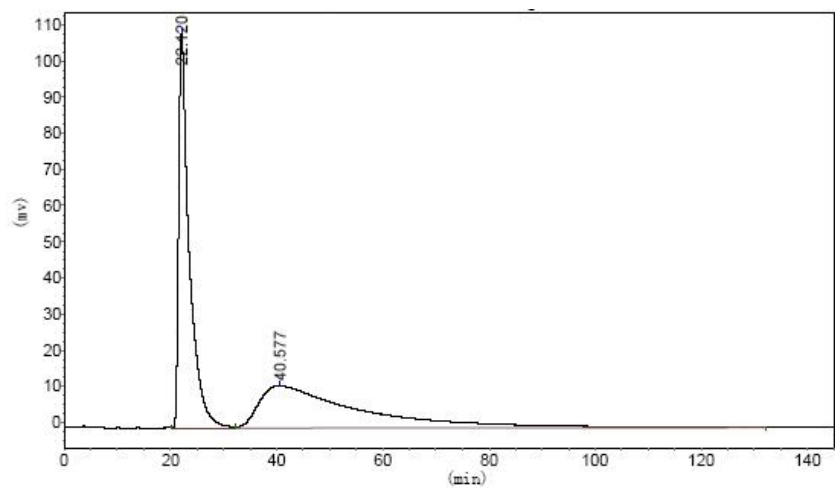

| No.   | ID.Name | R. Time | PeakHeight | PeakArea     | PerCent  |
|-------|---------|---------|------------|--------------|----------|
| 1     |         | 22.120  | 109333.656 | 15205662.000 | 50.2181  |
| 2     |         | 40.577  | 11654.870  | 15073587.000 | 49.7819  |
| Total |         |         | 120988.526 | 30279249.000 | 100.0000 |

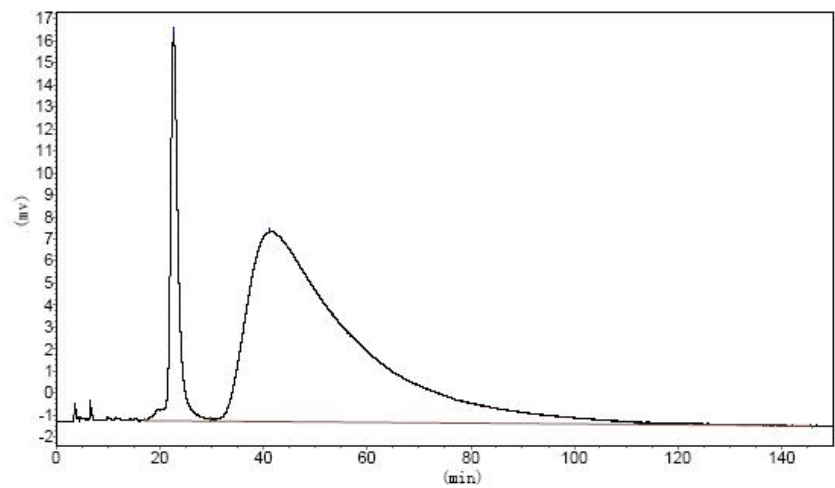

| No.   | ID.Name | R. Time | PeakHeight | PeakArea     | PerCent  |
|-------|---------|---------|------------|--------------|----------|
| 1     |         | 22.693  | 17698.703  | 1880456.125  | 13.3261  |
| 2     |         | 41.243  | 8631.114   | 12230623.000 | 86.6739  |
| Total |         |         | 26329.817  | 14111079.125 | 100.0000 |

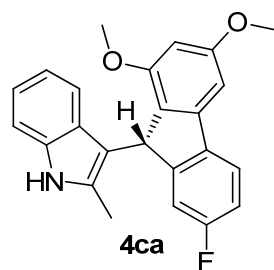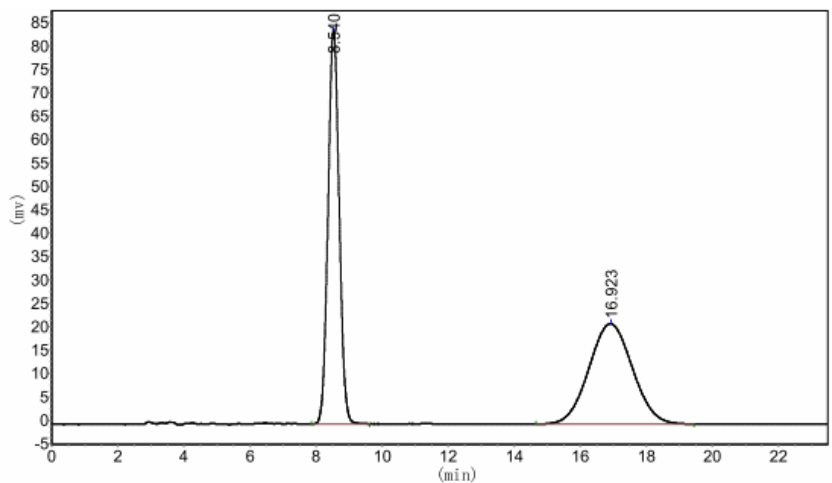

| No.   | ID.Name | R. Time | PeakHeight | PeakArea    | PerCent  |
|-------|---------|---------|------------|-------------|----------|
| 1     |         | 8.540   | 84051.367  | 1969217.250 | 50.0428  |
| 2     |         | 16.923  | 21450.584  | 1965850.000 | 49.9572  |
| Total |         |         | 105501.951 | 3935067.250 | 100.0000 |

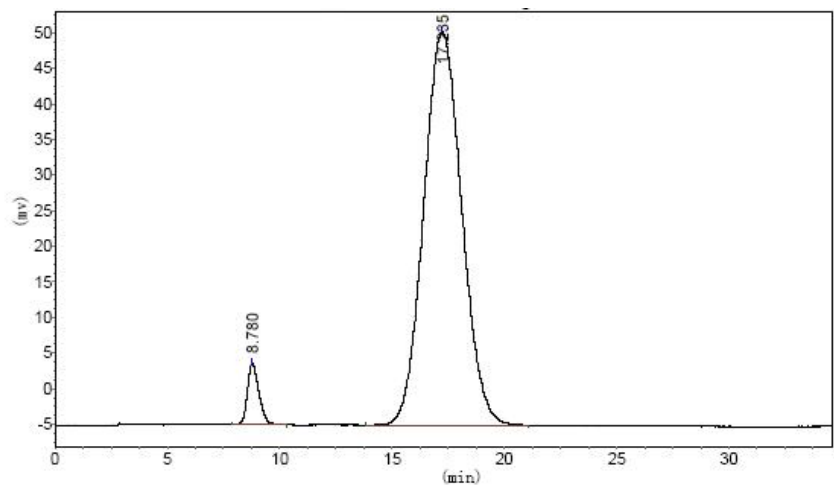

| No.   | ID.Name | R. Time | PeakHeight | PeakArea    | PerCent  |
|-------|---------|---------|------------|-------------|----------|
| 1     |         | 8.780   | 8635.133   | 306640.156  | 4.5001   |
| 2     |         | 17.235  | 55260.117  | 6507406.500 | 95.4999  |
| Total |         |         | 63895.250  | 6814046.656 | 100.0000 |

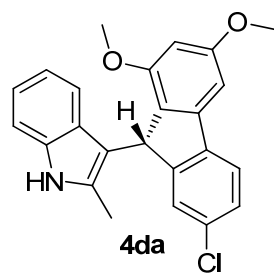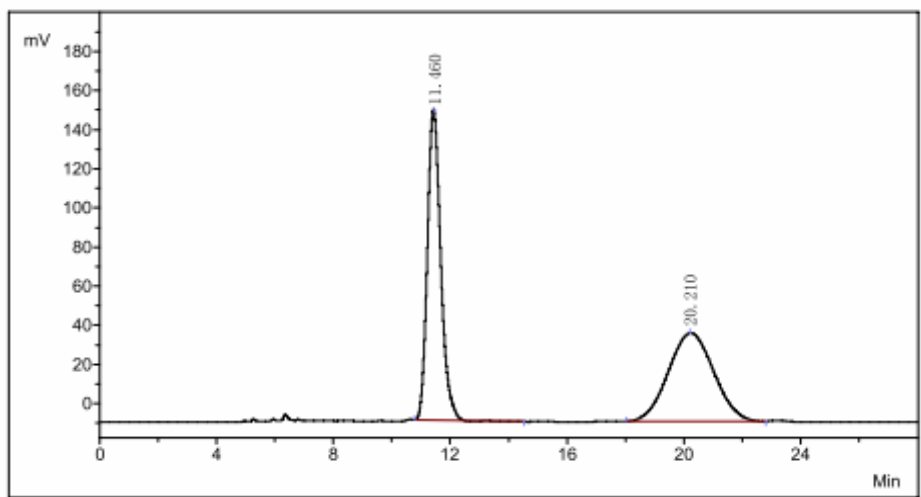

| No.   | PeakNo | ID. Name | R. Time | PeakHeight | PeakArea  | PerCent  |
|-------|--------|----------|---------|------------|-----------|----------|
| 1     | 1      | Unknown  | 11.460  | 157281.2   | 5027746.1 | 50.8608  |
| 2     | 2      | Unknown  | 20.210  | 44999.6    | 4857559.7 | 49.1392  |
| Total |        |          |         | 202280.7   | 9885305.8 | 100.0000 |

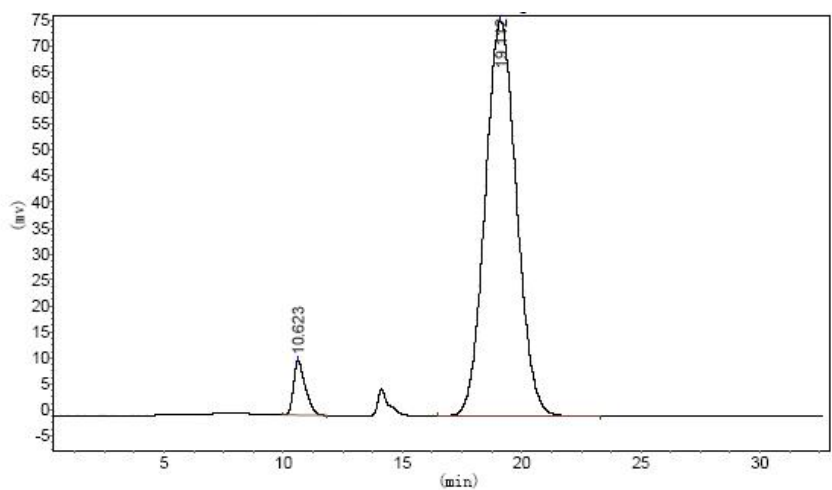

| No.   | ID.Name | R. Time | PeakHeight | PeakArea    | PerCent  |
|-------|---------|---------|------------|-------------|----------|
| 1     |         | 10.623  | 10579.317  | 360133.813  | 4.9261   |
| 2     |         | 19.112  | 75995.938  | 6950547.500 | 95.0739  |
| Total |         |         | 86575.255  | 7310681.313 | 100.0000 |

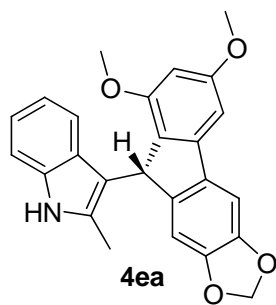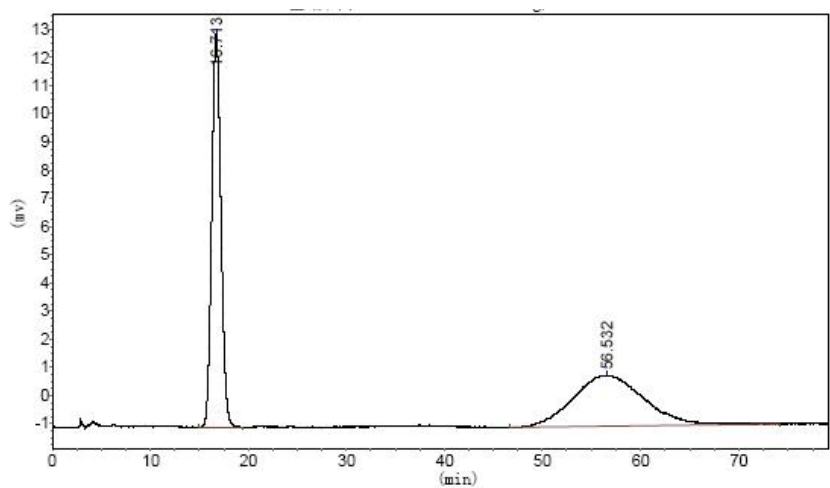

| No.   | ID.Name | R. Time | PeakHeight | PeakArea    | PerCent  |
|-------|---------|---------|------------|-------------|----------|
| 1     |         | 16.713  | 13959.788  | 911828.250  | 50.0030  |
| 2     |         | 56.532  | 1826.159   | 911717.500  | 49.9970  |
| Total |         |         | 15785.947  | 1823545.750 | 100.0000 |

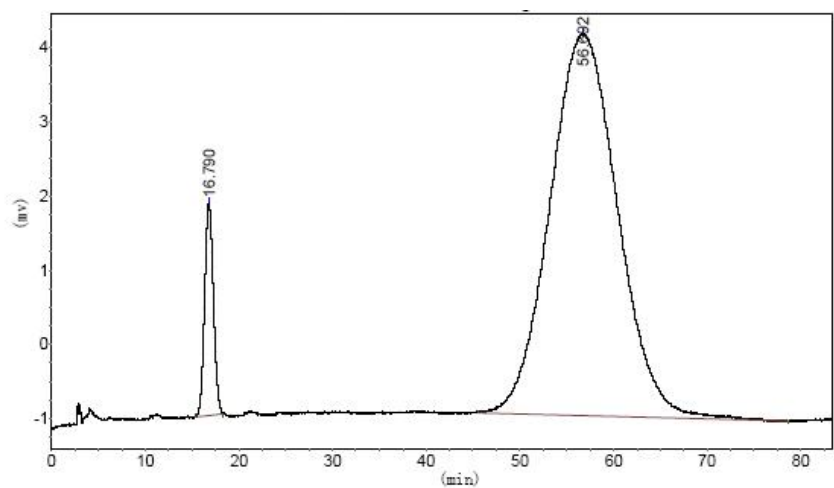

| No.   | ID.Name | R. Time | PeakHeight | PeakArea    | PerCent  |
|-------|---------|---------|------------|-------------|----------|
| 1     |         | 16.790  | 2866.181   | 186654.906  | 6.7291   |
| 2     |         | 56.692  | 5146.988   | 2587195.500 | 93.2709  |
| Total |         |         | 8013.169   | 2773850.406 | 100.0000 |

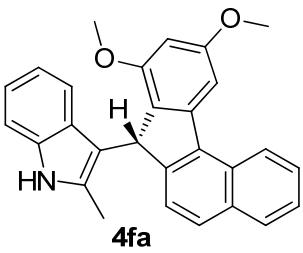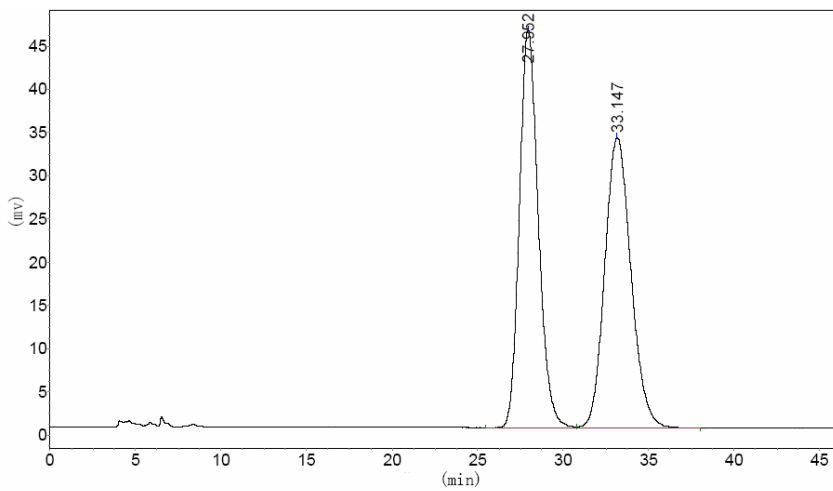

| NO.   | ID.Name | R. Time | PeakHeight | PeakArea    | PerCent  |
|-------|---------|---------|------------|-------------|----------|
| 1     |         | 27.952  | 46015.656  | 3555679.250 | 49.8546  |
| 2     |         | 33.147  | 33585.824  | 3576415.000 | 50.1454  |
| Total |         |         | 79601.480  | 7132094.250 | 100.0000 |

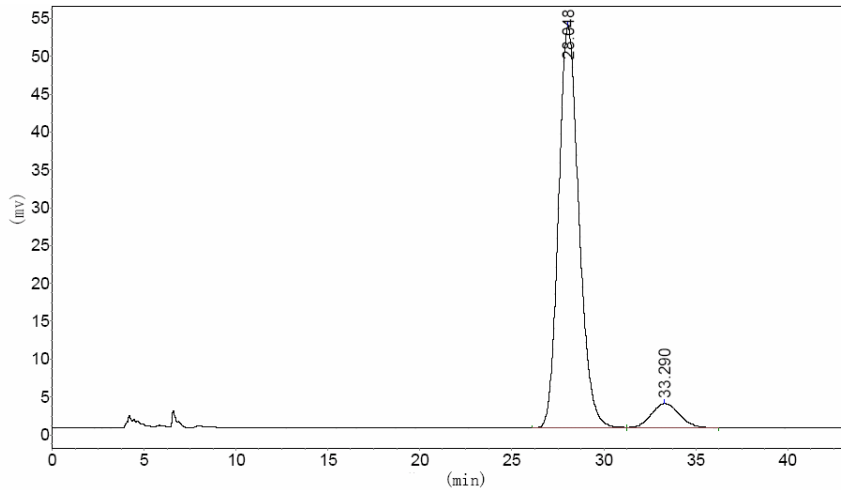

| NO.   | ID.Name | R. Time | PeakHeight | PeakArea    | PerCent  |
|-------|---------|---------|------------|-------------|----------|
| 1     |         | 28.048  | 53113.387  | 4115548.250 | 92.2171  |
| 2     |         | 33.290  | 3260.416   | 347341.688  | 7.7829   |
| Total |         |         | 56373.803  | 4462889.938 | 100.0000 |

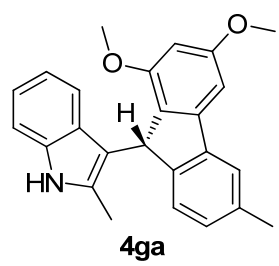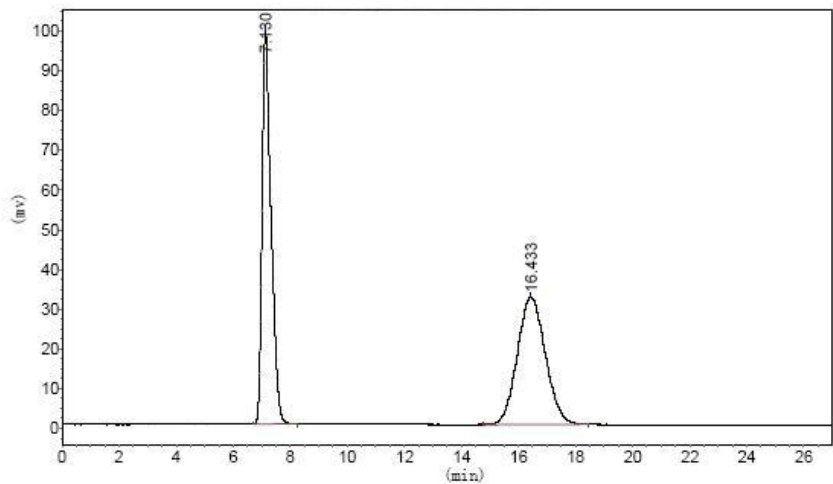

| No.   | ID.Name | R. Time | PeakHeight | PeakArea    | PerCent  |
|-------|---------|---------|------------|-------------|----------|
| 1     |         | 7.130   | 99387.359  | 2165770.750 | 49.6716  |
| 2     |         | 16.433  | 32001.842  | 2194407.250 | 50.3284  |
| Total |         |         | 131389.201 | 4360178.000 | 100.0000 |

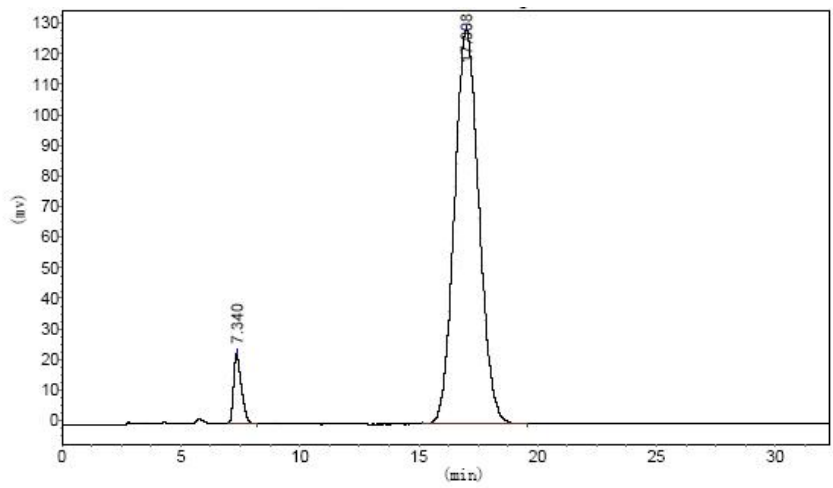

| No.   | ID.Name | R. Time | PeakHeight | PeakArea    | PerCent  |
|-------|---------|---------|------------|-------------|----------|
| 1     |         | 7.340   | 23214.480  | 525830.625  | 5.3882   |
| 2     |         | 17.008  | 128541.750 | 9233123.000 | 94.6118  |
| Total |         |         | 151756.230 | 9758953.625 | 100.0000 |



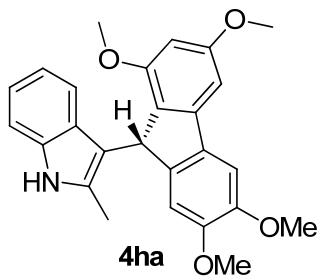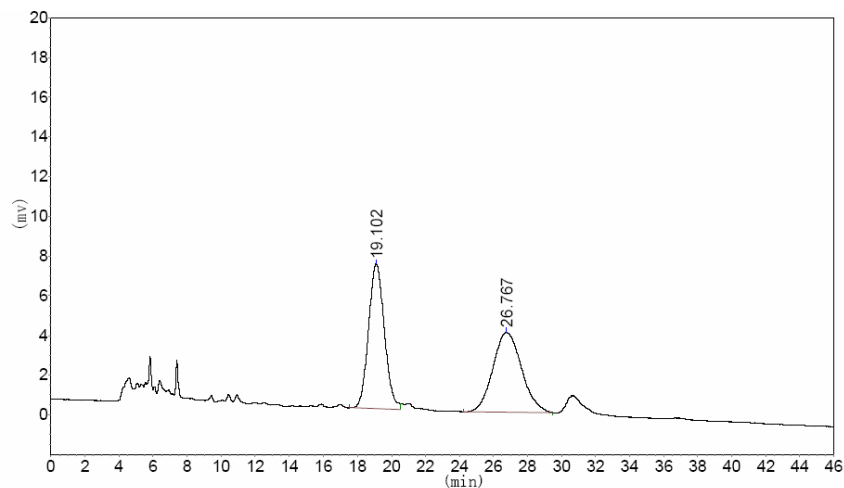

| NO.   | ID.Name | R. Time | PeakHeight | PeakArea   | PerCent  |
|-------|---------|---------|------------|------------|----------|
| 1     |         | 19.102  | 7261.639   | 471384.313 | 50.1553  |
| 2     |         | 26.767  | 4020.227   | 468465.813 | 49.8447  |
| Total |         |         | 11281.866  | 939850.125 | 100.0000 |

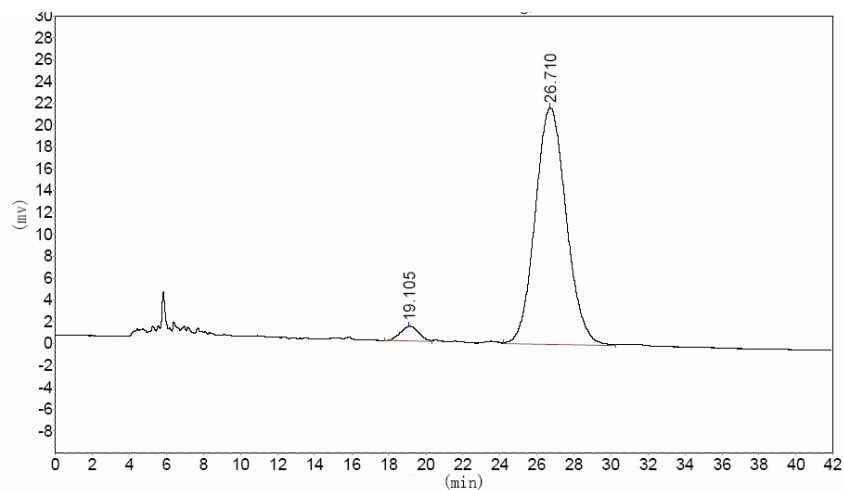

| NO.   | ID.Name | R. Time | PeakHeight | PeakArea    | PerCent  |
|-------|---------|---------|------------|-------------|----------|
| 1     |         | 19.105  | 1352.654   | 95041.359   | 3.6283   |
| 2     |         | 26.710  | 21647.547  | 2524383.750 | 96.3717  |
| Total |         |         | 23000.201  | 2619425.109 | 100.0000 |

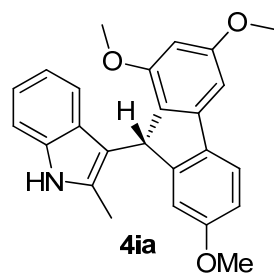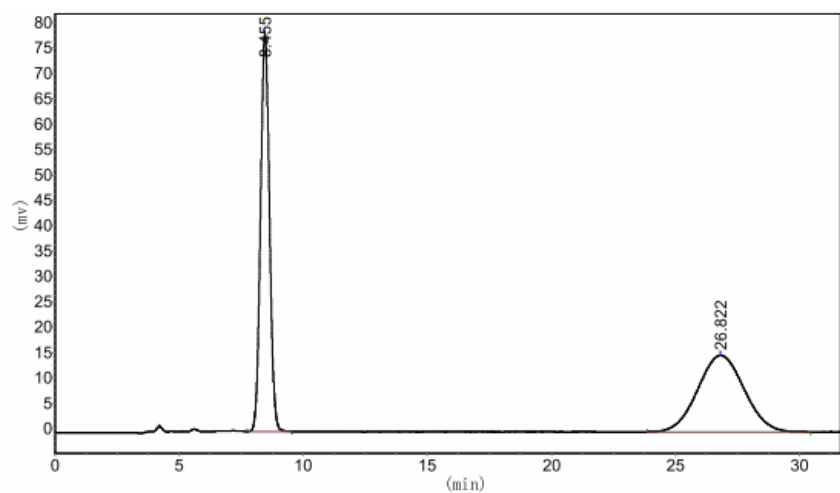

| NO.   | ID.Name | R. Time | PeakHeight | PeakArea    | PerCent  |
|-------|---------|---------|------------|-------------|----------|
| 1     |         | 8.455   | 78307.414  | 1963594.125 | 49.9467  |
| 2     |         | 26.822  | 15102.583  | 1967783.250 | 50.0533  |
| Total |         |         | 93409.997  | 3931377.375 | 100.0000 |

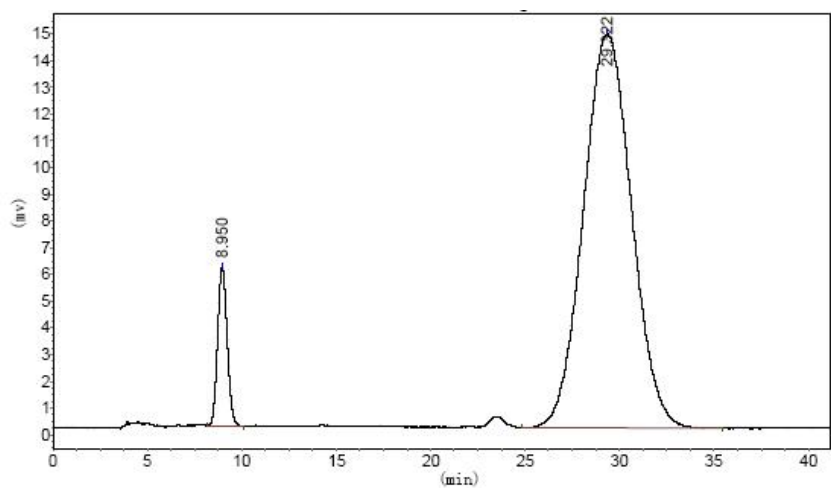

| No.   | ID.Name | R. Time | PeakHeight | PeakArea    | PerCent  |
|-------|---------|---------|------------|-------------|----------|
| 1     |         | 8.950   | 5946.061   | 209990.828  | 7.4287   |
| 2     |         | 29.322  | 14759.735  | 2616772.750 | 92.5713  |
| Total |         |         | 20705.796  | 2826763.578 | 100.0000 |

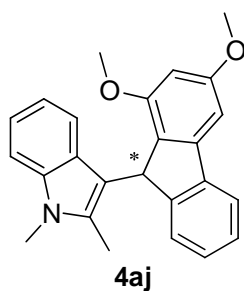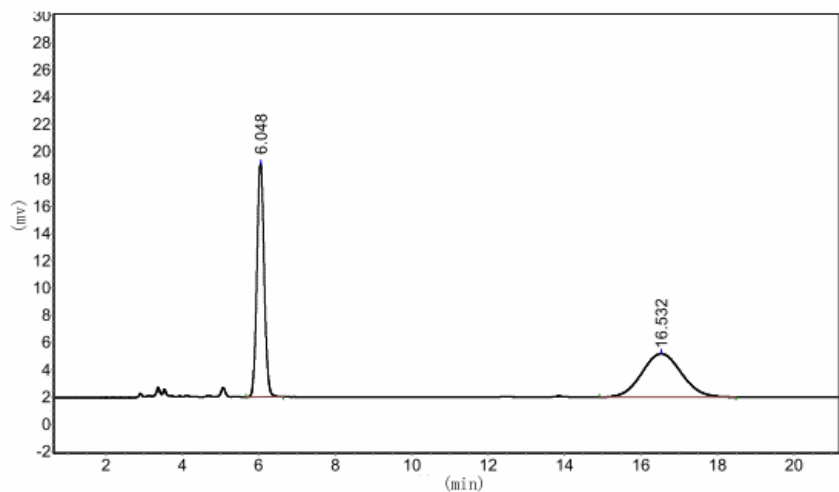

| No.   | ID.Name | R. Time | PeakHeight | PeakArea   | PerCent  |
|-------|---------|---------|------------|------------|----------|
| 1     |         | 6.048   | 17103.025  | 225344.250 | 49.7525  |
| 2     |         | 16.532  | 3179.240   | 227586.125 | 50.2475  |
| Total |         |         | 20282.265  | 452930.375 | 100.0000 |

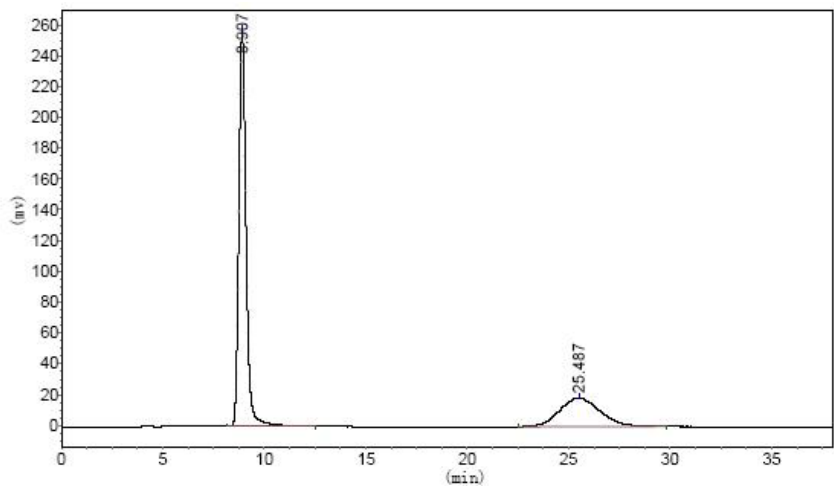

| No.   | ID.Name | R. Time | PeakHeight | PeakArea    | PerCent  |
|-------|---------|---------|------------|-------------|----------|
| 1     |         | 8.907   | 257341.422 | 6403337.000 | 71.2182  |
| 2     |         | 25.487  | 18455.123  | 2587817.750 | 28.7818  |
| Total |         |         | 275796.545 | 8991154.750 | 100.0000 |

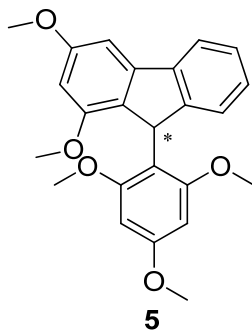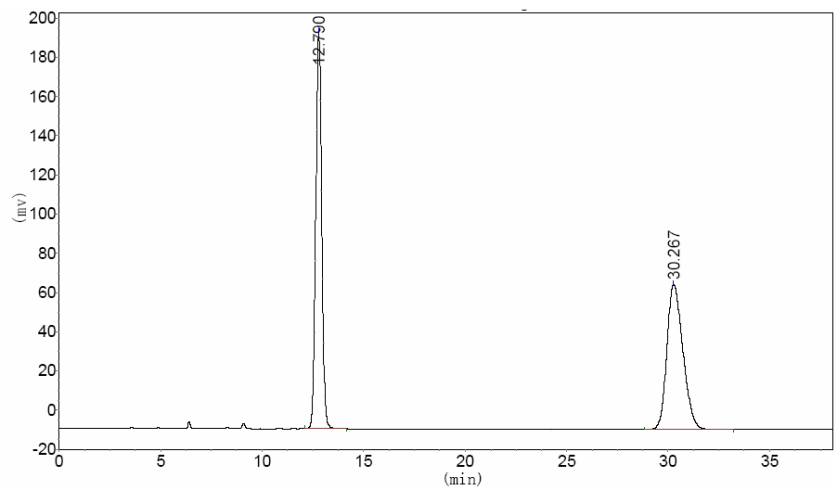

| NO.   | ID.Name | R. Time | PeakHeight | PeakArea    | PerCent  |
|-------|---------|---------|------------|-------------|----------|
| 1     |         | 12.790  | 202241.328 | 4038139.500 | 50.0142  |
| 2     |         | 30.267  | 73987.258  | 4035851.750 | 49.9858  |
| Total |         |         | 276228.586 | 8073991.250 | 100.0000 |

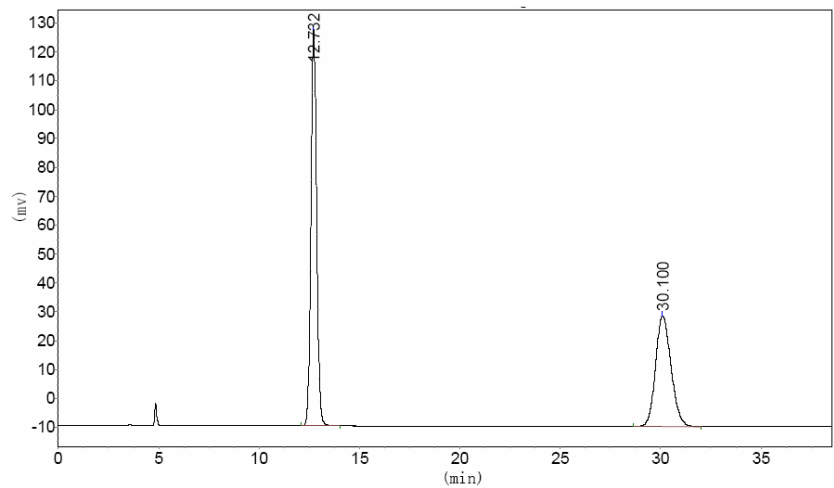

| NO.   | ID.Name | R. Time | PeakHeight | PeakArea    | PerCent  |
|-------|---------|---------|------------|-------------|----------|
| 1     |         | 12.732  | 137221.703 | 2716097.000 | 57.0686  |
| 2     |         | 30.100  | 38312.938  | 2043254.250 | 42.9314  |
| Total |         |         | 175534.641 | 4759351.250 | 100.0000 |

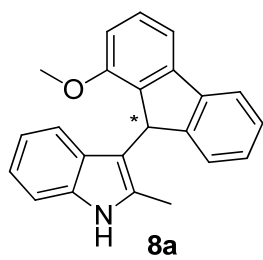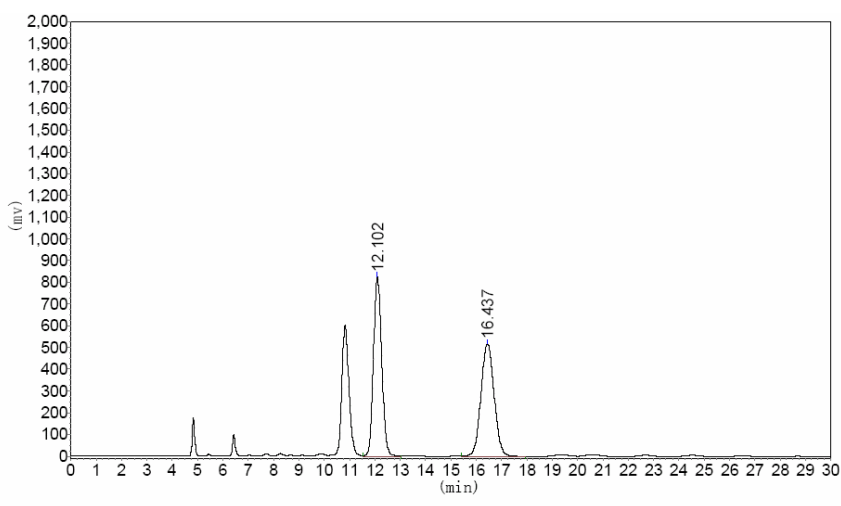

| NO.   | ID.Name | R. Time | PeakHeight  | PeakArea     | PerCent  |
|-------|---------|---------|-------------|--------------|----------|
| 1     |         | 12.102  | 824555.688  | 18564534.000 | 49.9778  |
| 2     |         | 16.437  | 517677.125  | 18581060.000 | 50.0222  |
| Total |         |         | 1342232.813 | 37145594.000 | 100.0000 |

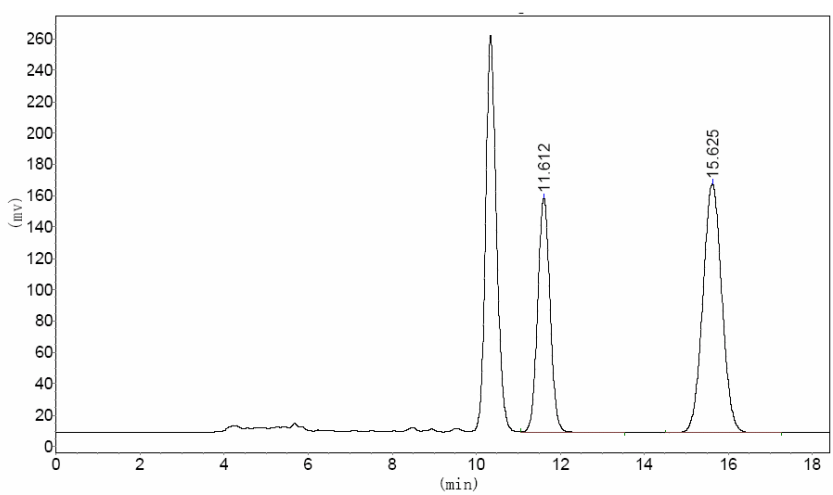

| NO.   | ID.Name | R. Time | PeakHeight | PeakArea    | PerCent  |
|-------|---------|---------|------------|-------------|----------|
| 1     |         | 11.612  | 149540.406 | 3035081.250 | 37.8251  |
| 2     |         | 15.625  | 158999.531 | 4988914.500 | 62.1749  |
| Total |         |         | 308539.938 | 8023995.750 | 100.0000 |

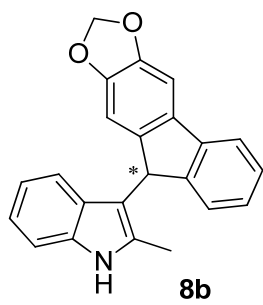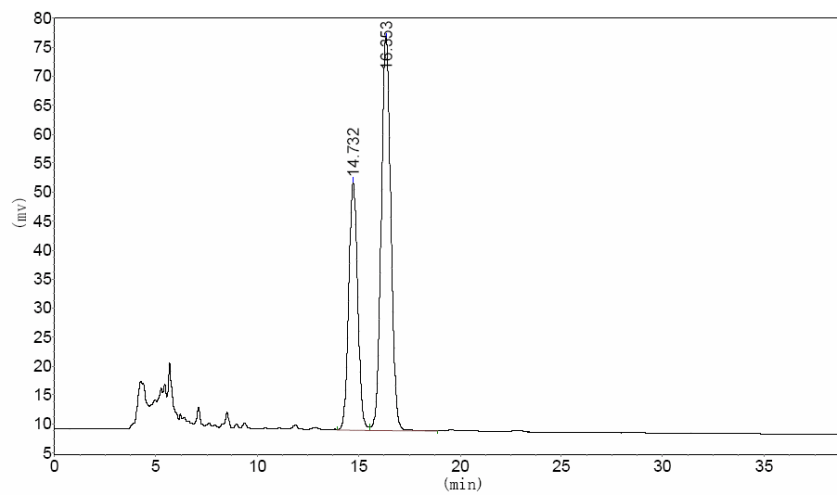

| NO.   | ID.Name | R. Time | PeakHeight  | PeakArea     | PerCent   |
|-------|---------|---------|-------------|--------------|-----------|
| 1     |         | 14. 732 | 42796. 059  | 1306744. 750 | 36. 9488  |
| 2     |         | 16. 353 | 67826. 836  | 2229889. 250 | 63. 0512  |
| Total |         |         | 110622. 895 | 3536634. 000 | 100. 0000 |
